# Supplementary material for: Part 2. Mechanistic aspects of the reduction of S-alkyl-thionocarbonates in the presence of triethylborane and air
Source: PubMed Central journal article supplement (PMC2213662; doi:10.1186/1860-5397-3-46), 2007-12-12

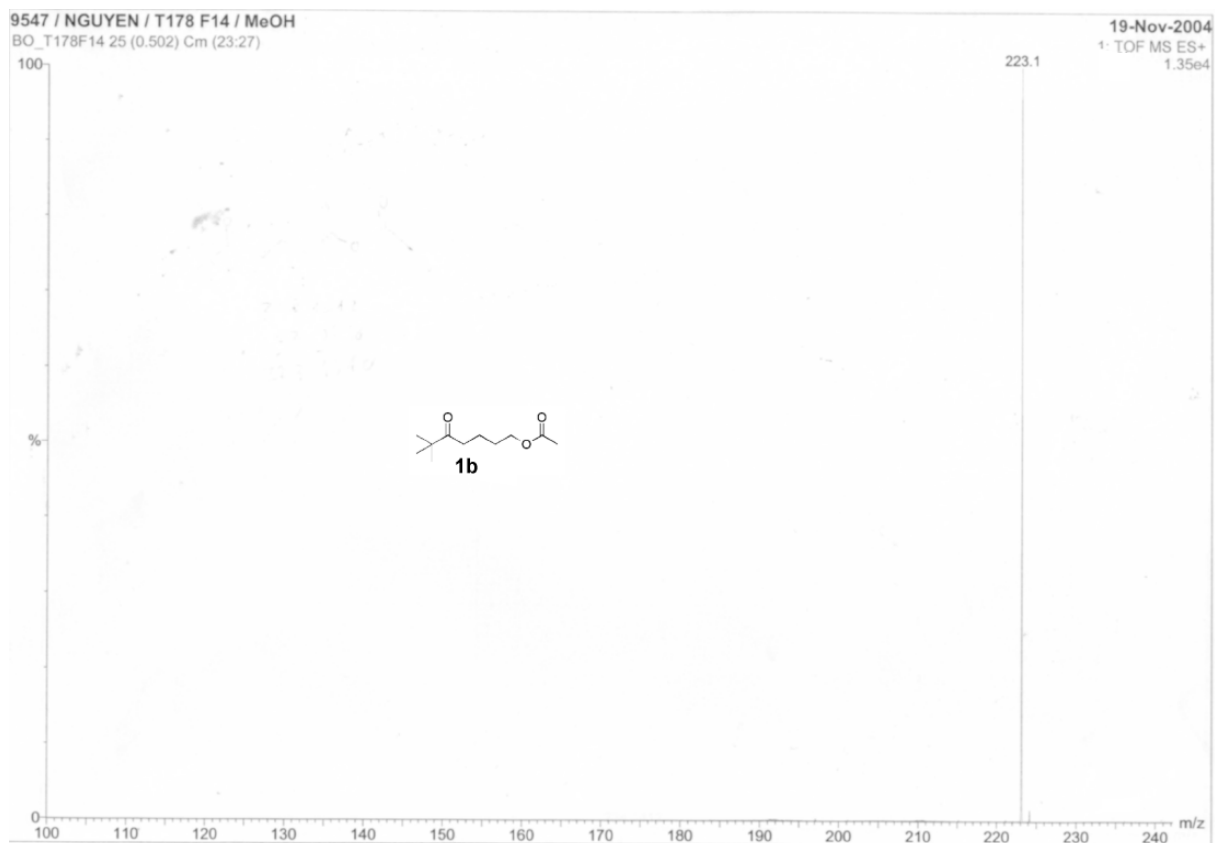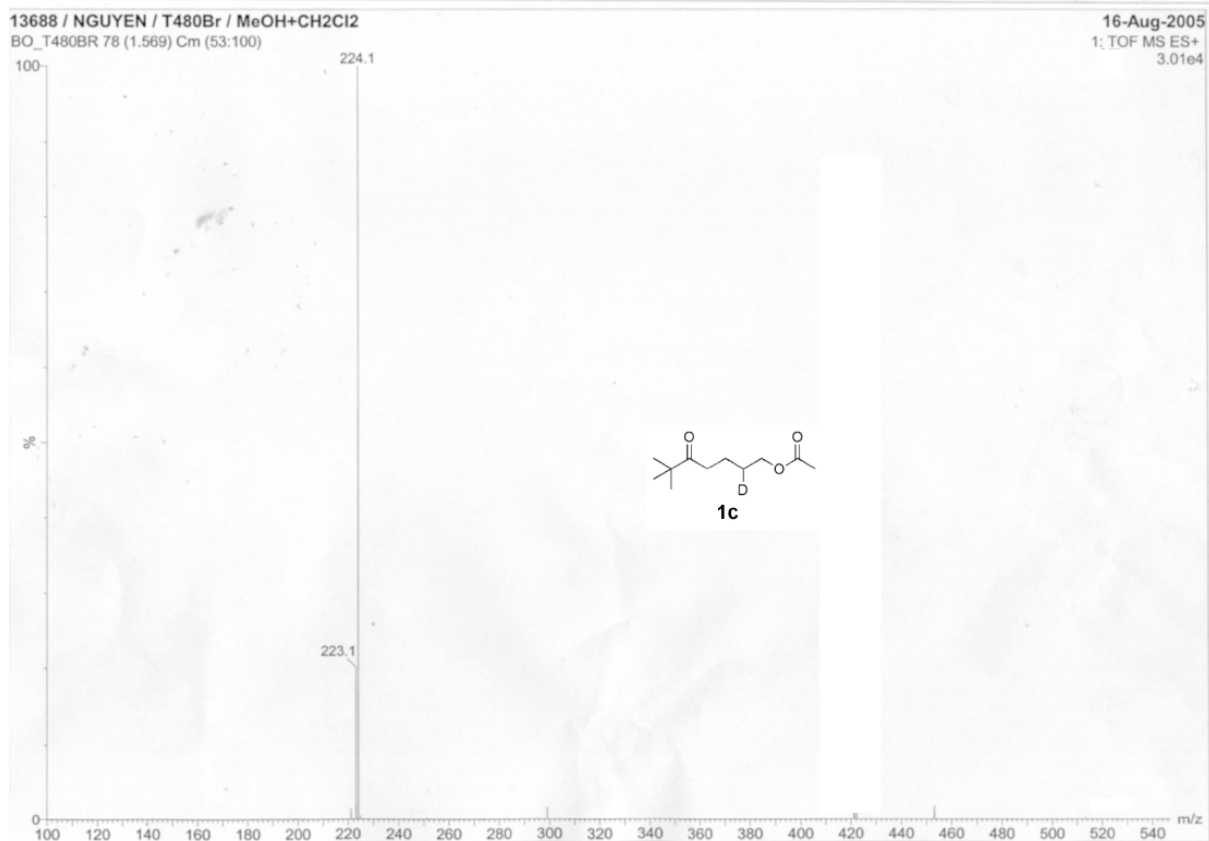

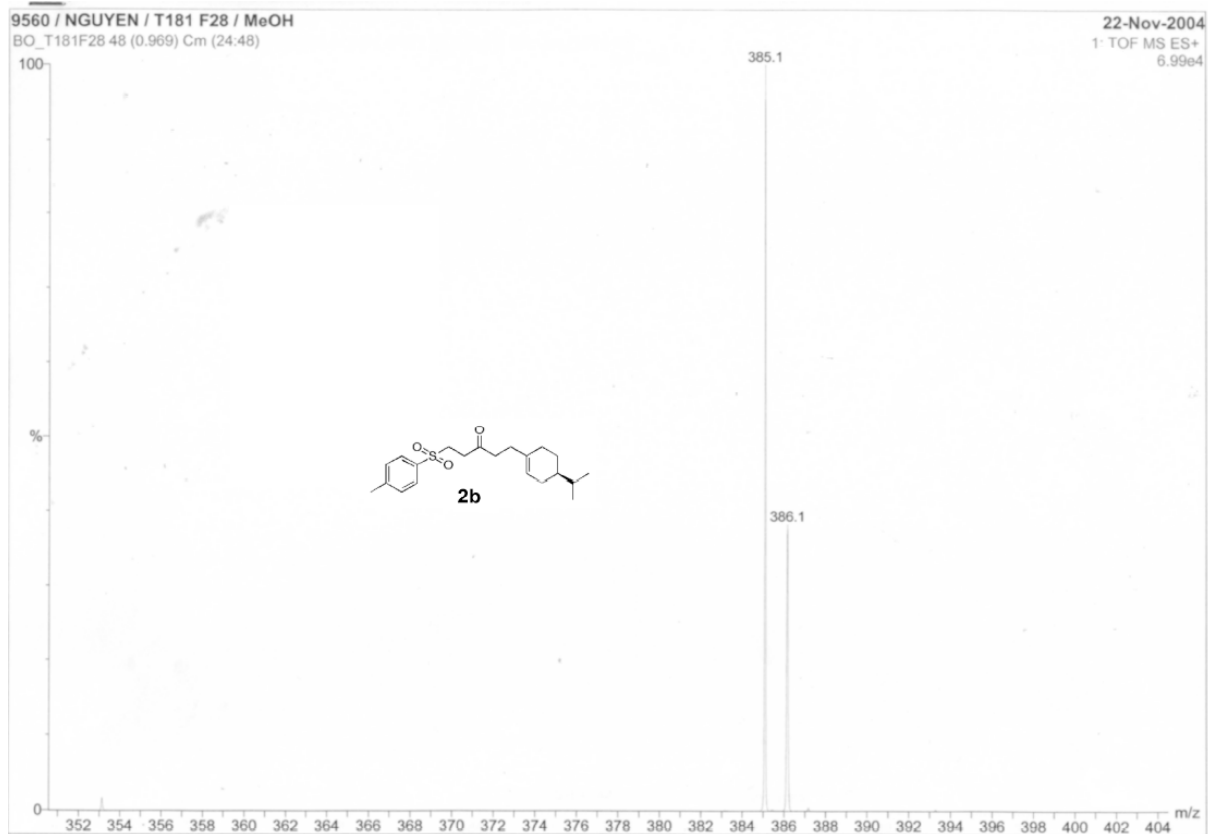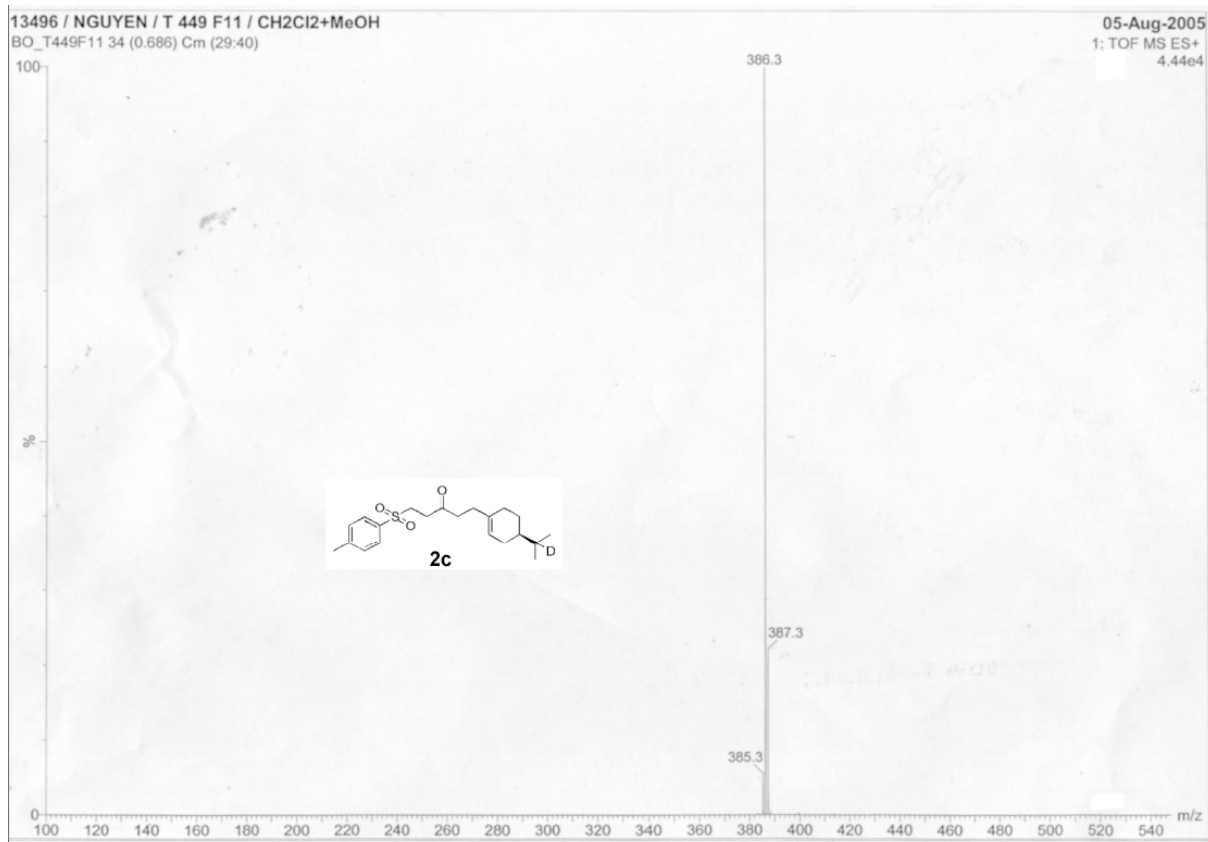

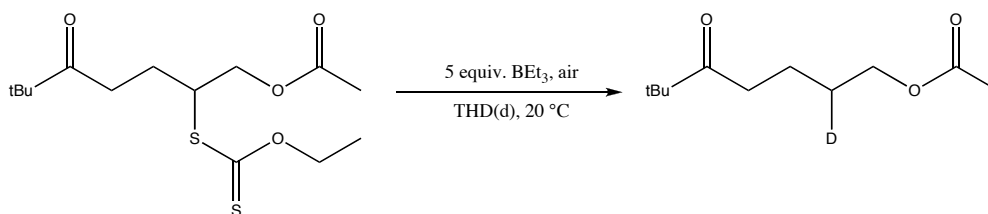

Line#: 1 R.Time:6.000(Scan#:421)  
 MassPeaks:80  
 RawMode:Single 6.000(421) BasePeak:57.15(8390970)  
 BG Mode:None

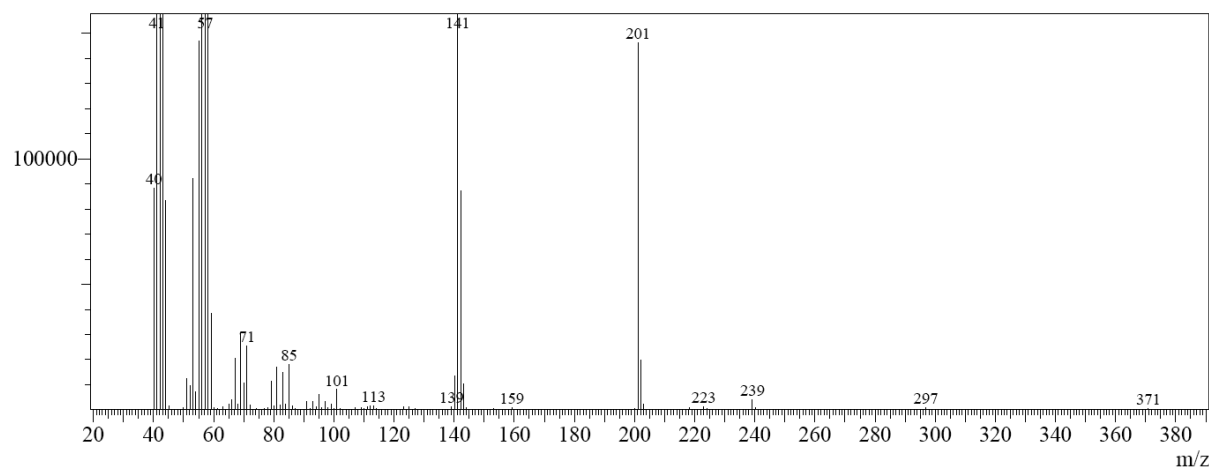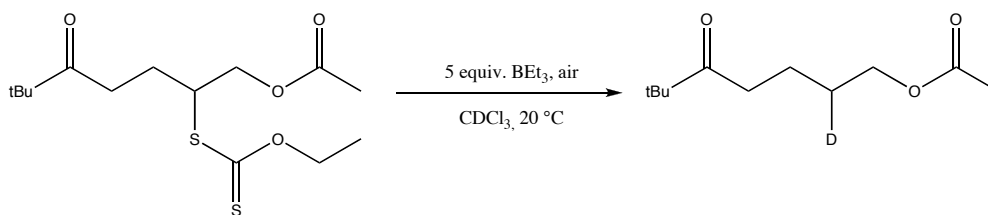

Line#: 1 R.Time:5.992(Scan#:420)  
 MassPeaks:130  
 RawMode:Averaged 5.933-6.050(413-427) BasePeak:57.05(8418437)  
 BG Mode:None

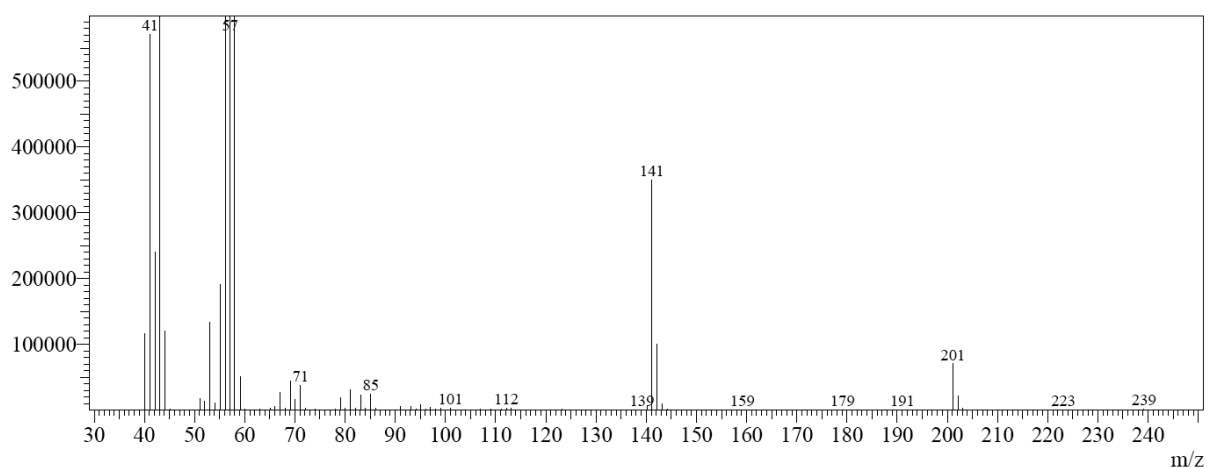

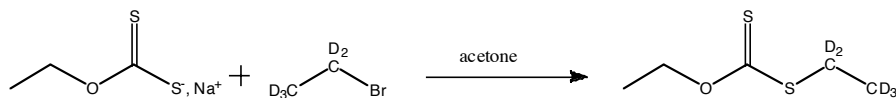

Line#:1 R.Time:5.225(Scan#:328)

MassPeaks:108

RawMode:Averaged 5.167-5.283(321-335) BasePeak:57.05(8428816)

BG Mode:None

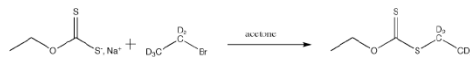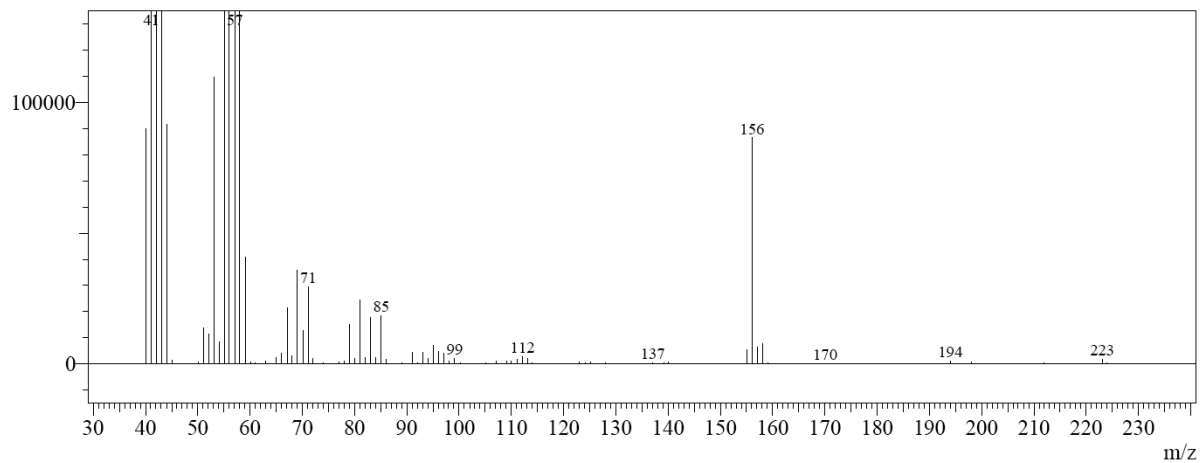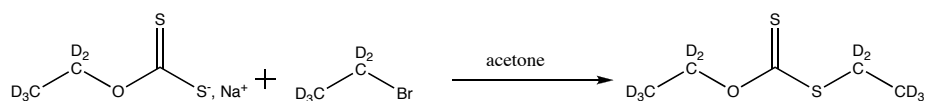

Line#:1 R.Time:5.158(Scan#:320)

MassPeaks:118

RawMode:Averaged 5.117-5.208(315-326) BasePeak:57.05(8430370)

BG Mode:None

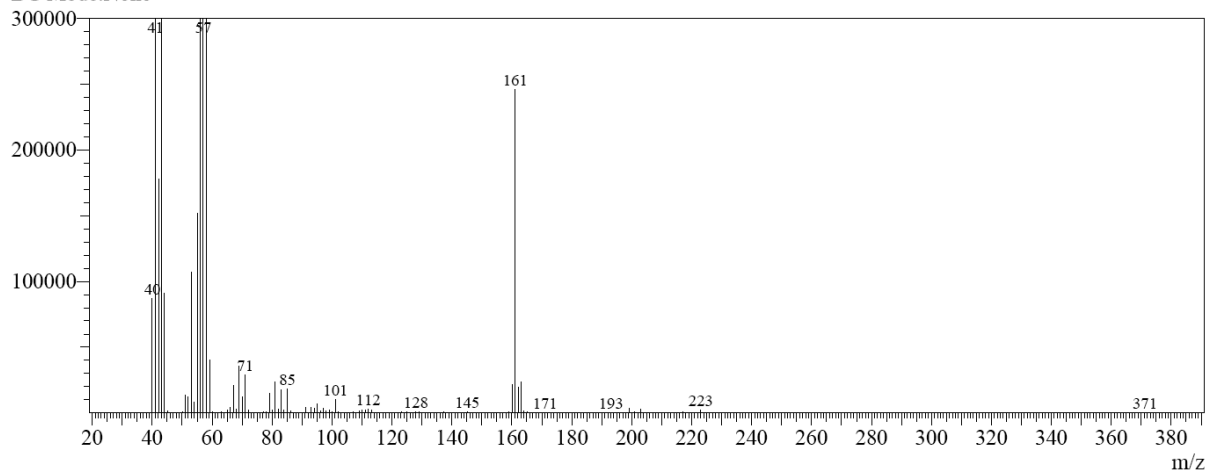

Compound 3

S48

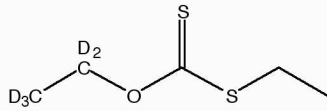

Chemical Formula:  $C_5H_5D_5OS_2$   
 Exact Mass: 155,04869  
 Molecular Weight: 155,29311

Line#:1 R.Time:3.233(Scan#:89)  
 MassPeaks:120  
 RawMode:Averaged 3.217-3.283(87-95) BasePeak:57.15(8405324)  
 BG Mode:None

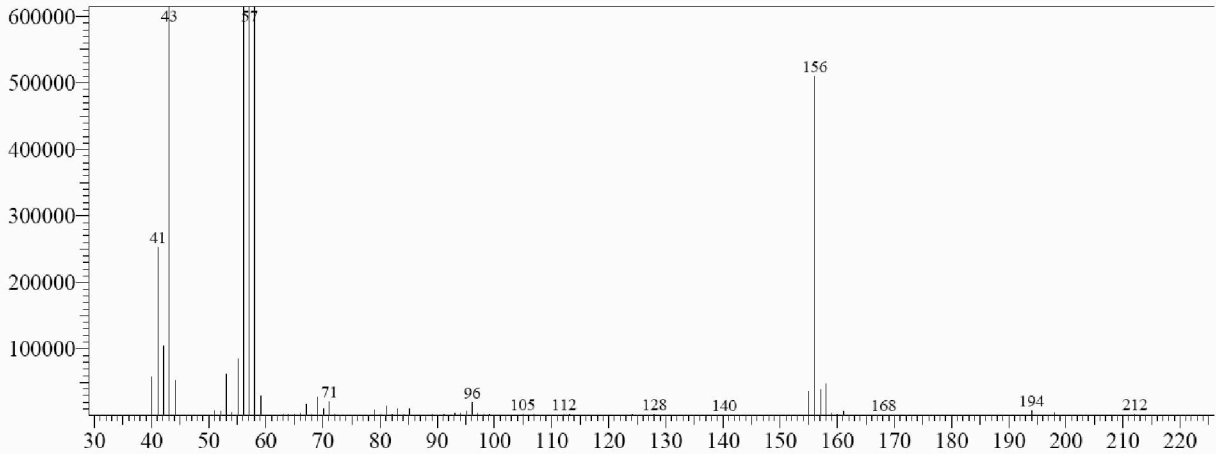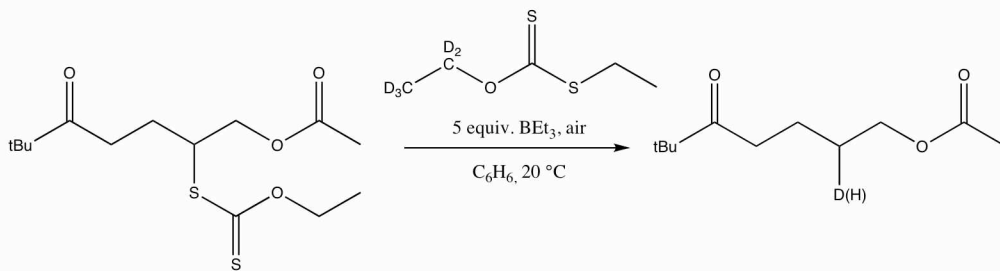

Line#:1 R.Time:6.000(Scan#:421)  
 MassPeaks:94  
 RawMode:Averaged 5.950-6.008(415-422) BasePeak:57.05(8396871)  
 BG Mode:None

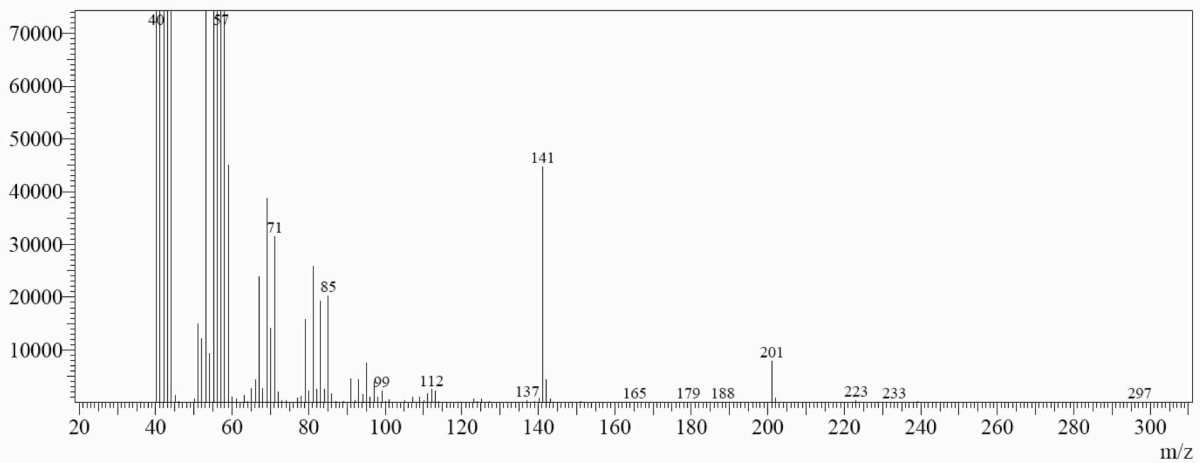

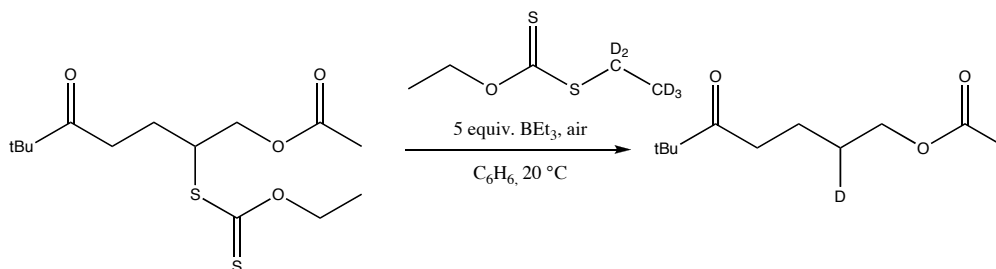

Line#: 1 R.Time: 5.992(Scan#: 420)  
 MassPeaks: 111  
 RawMode: Averaged 5.958-6.008(416-422) BasePeak: 57.05(8396884)  
 BG Mode: None

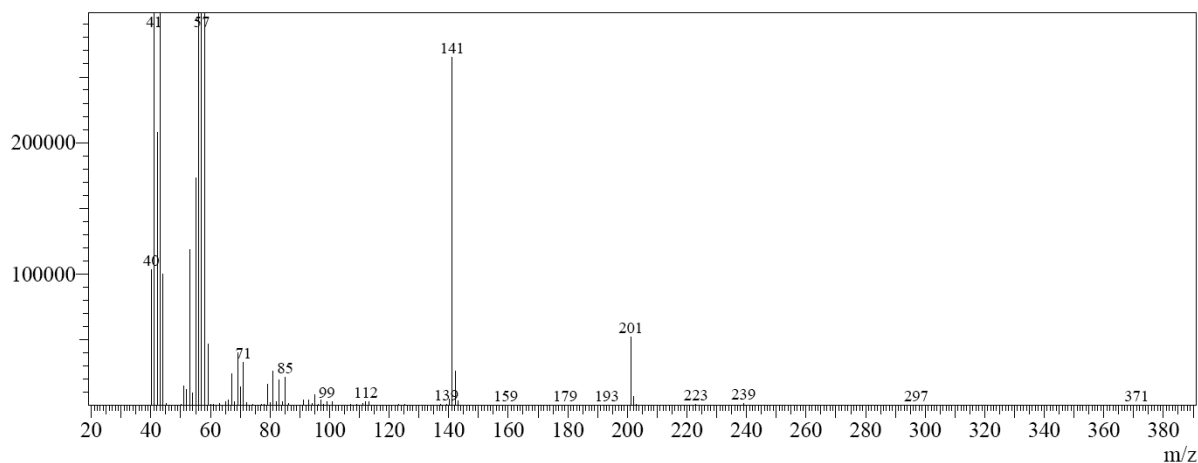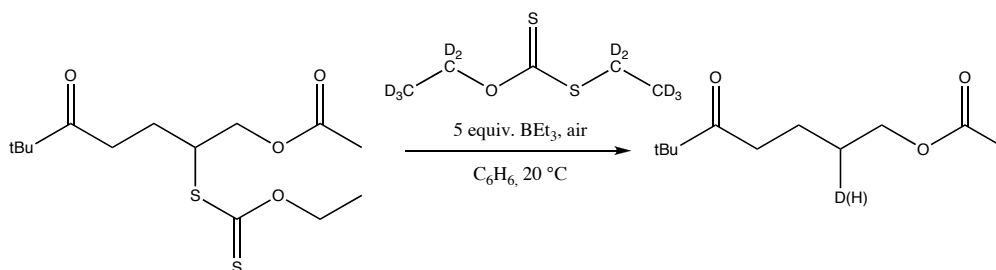

Line#: 1 R.Time: 5.992(Scan#: 420)  
 MassPeaks: 95  
 RawMode: Averaged 5.975-6.008(418-422) BasePeak: 57.05(8395550)  
 BG Mode: None

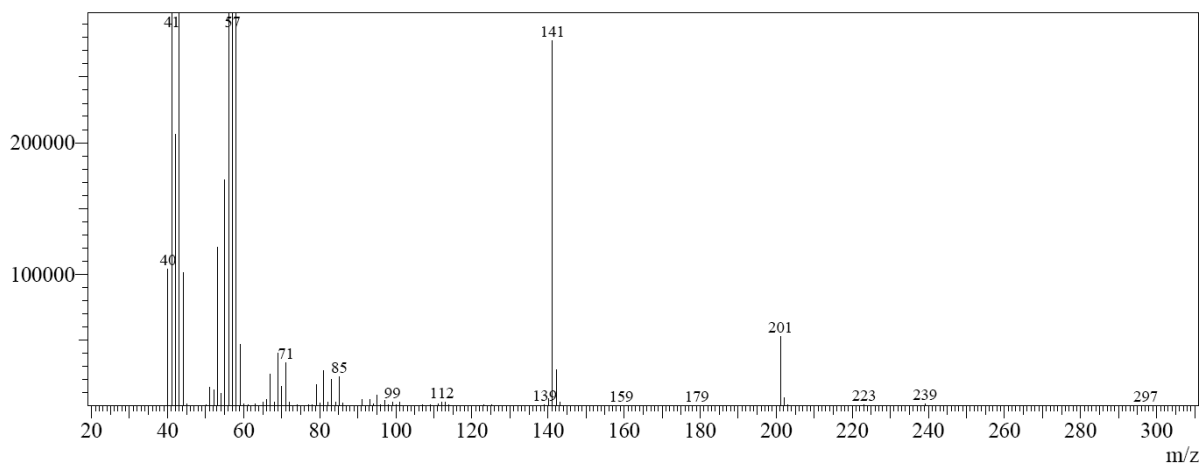

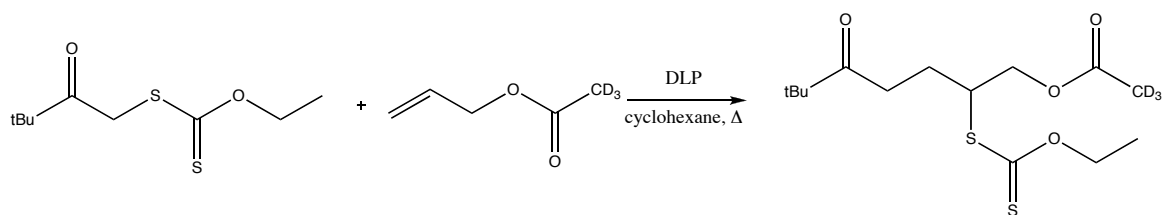

Line#1 R.Time:15.483(Scan#:1559)  
 MassPeaks:108  
 RawMode:Single 15.483(1559) BasePeak:57.05(8431497)  
 BG Mode:None

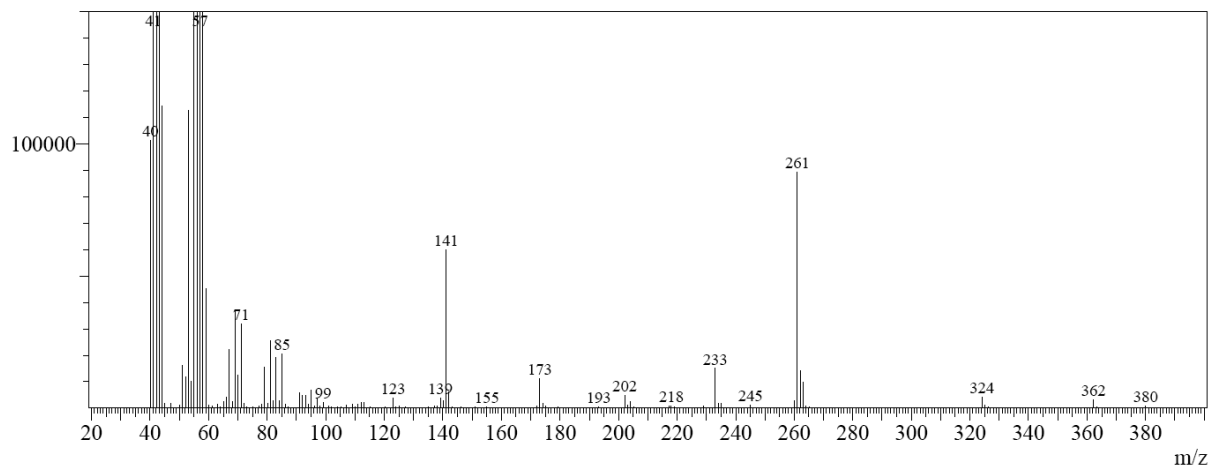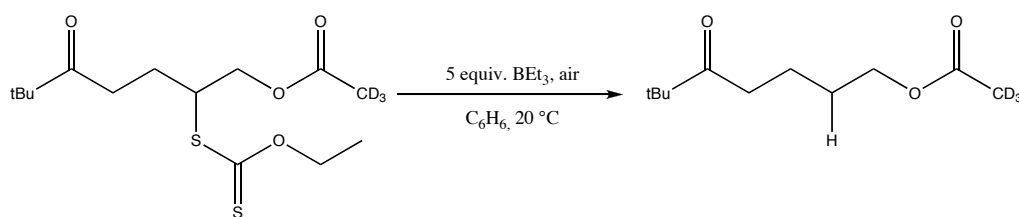

Line#1 R.Time:5.975(Scan#:418)  
 MassPeaks:117  
 RawMode:Averaged 5.942-6.017(414-423) BasePeak:57.05(8398090)  
 BG Mode:None

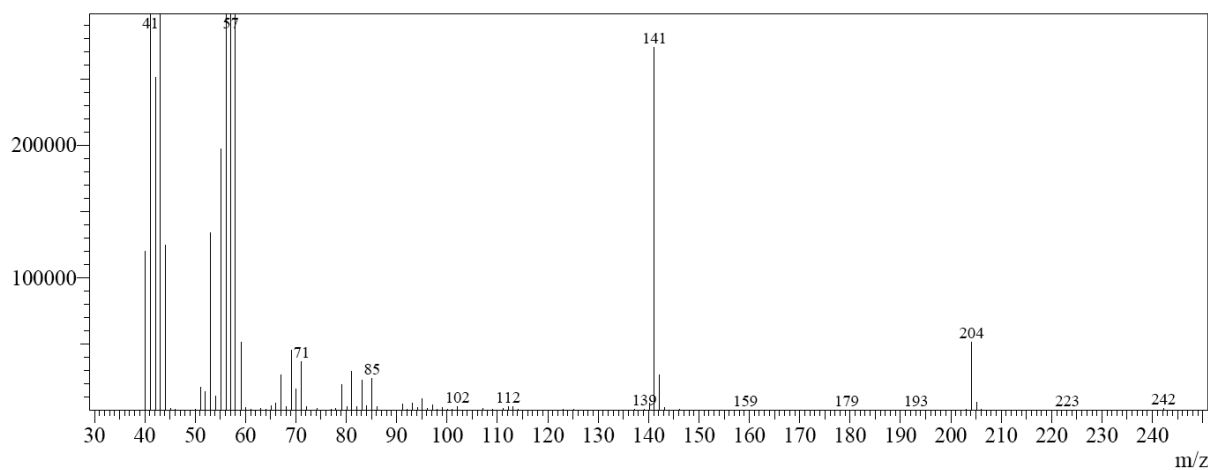

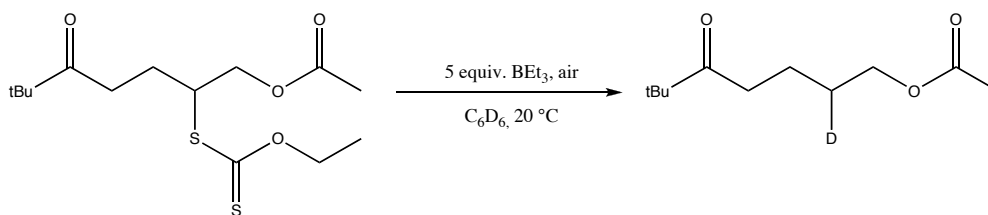

Line#:1 R.Time:5.958(Scan#:416)  
 MassPeaks:86  
 RawMode:Single 5.958(416) BasePeak:57.15(8389521)  
 BG Mode:None

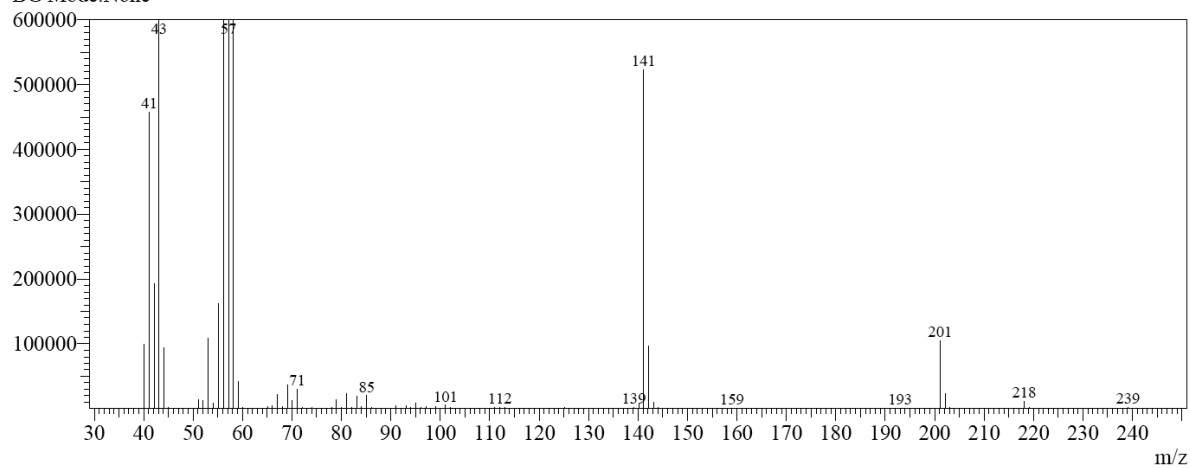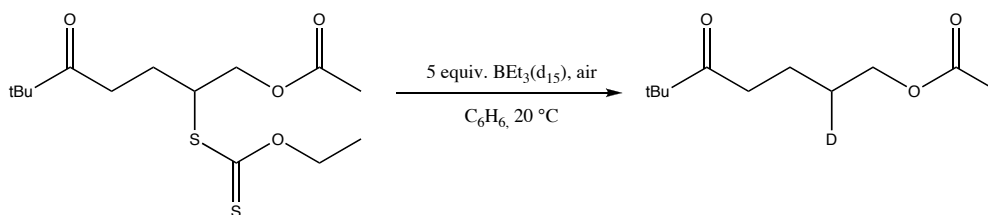

Line#:1 R.Time:5.942(Scan#:414)  
 MassPeaks:85  
 RawMode:Single 5.942(414) BasePeak:57.15(8396984)  
 BG Mode:None

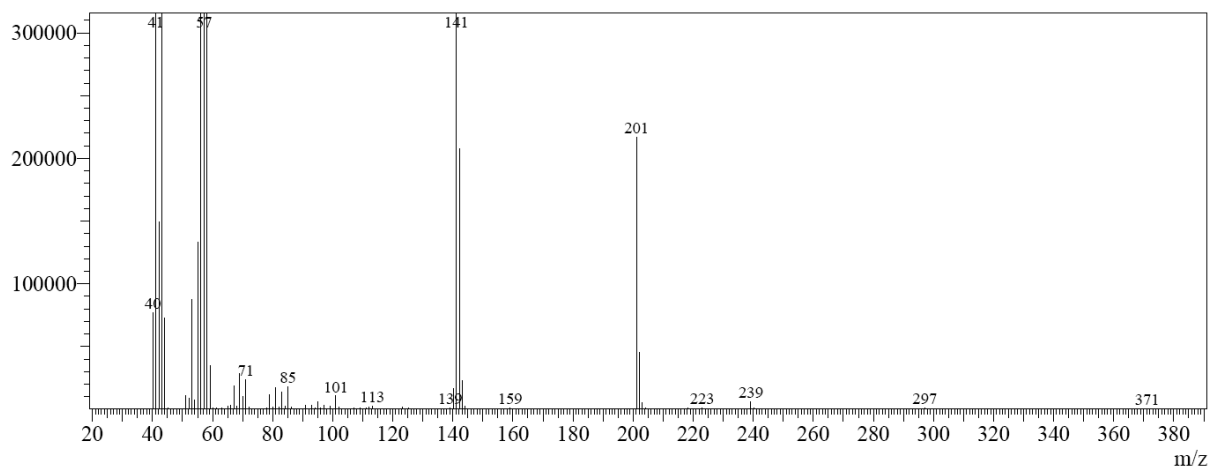



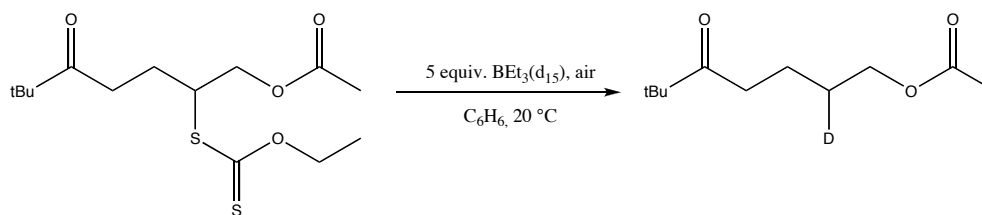

## Teflon RBF

Line#:1 R.Time:5.983(Scan#:419)  
 MassPeaks:101  
 RawMode:Averaged 5.967-5.992(417-420) BasePeak:57.05(8410628)  
 BG Mode:None

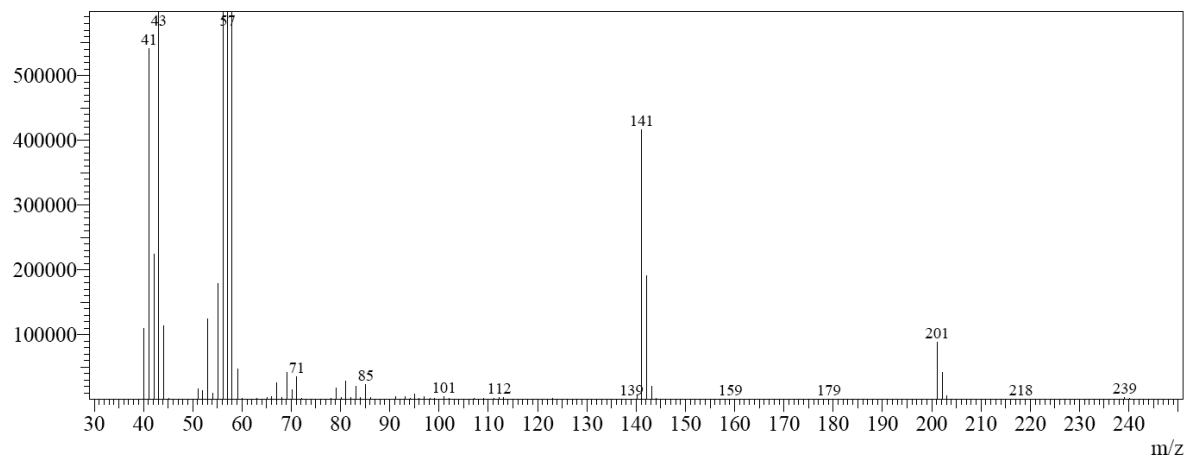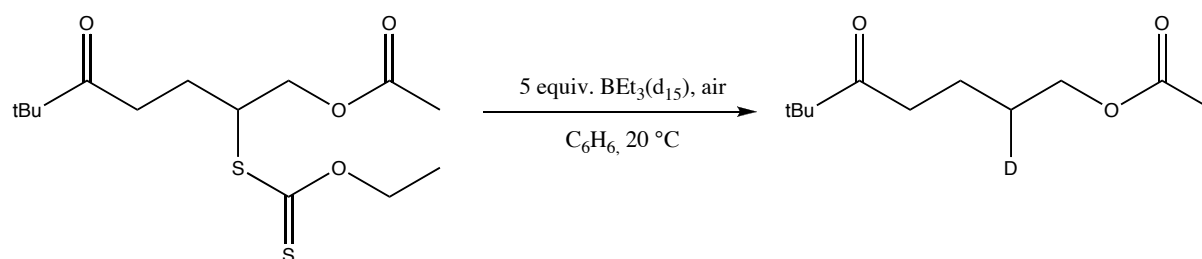

## Teflon RBF + glass rings

Line#:1 R.Time:5.965(Scan#:416)  
 MassPeaks:85  
 RawMode:Single 5.965(416) BasePeak:57.14(8389514)  
 BG Mode:None

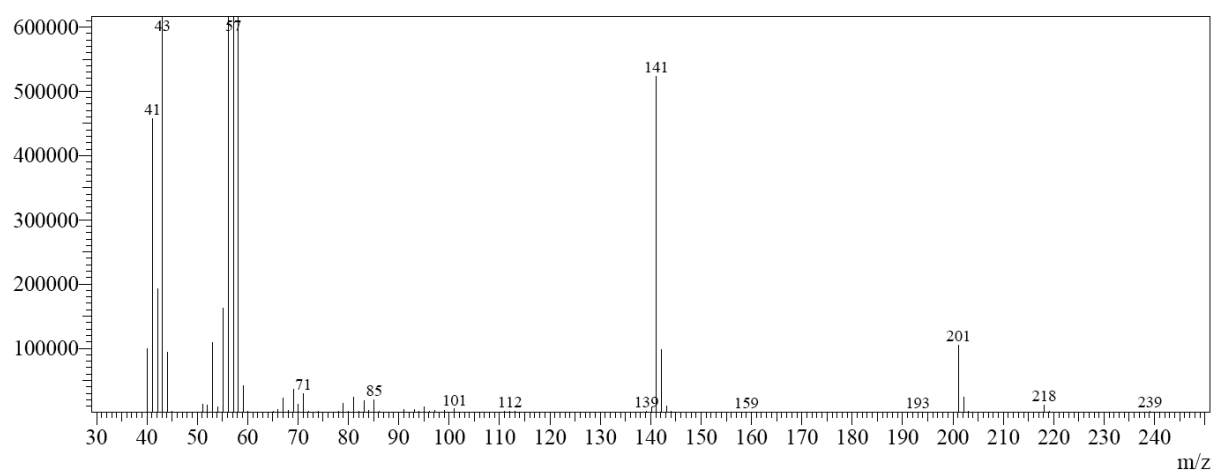

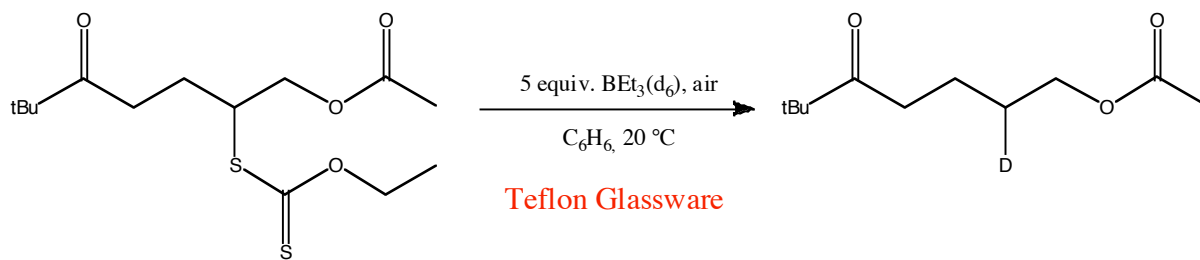

Line#:1 R.Time:5.958(Scan#:416)  
 MassPeaks:65  
 RawMode:Single 5.958(416) BasePeak:57.05(8428925)  
 BG Mode:None

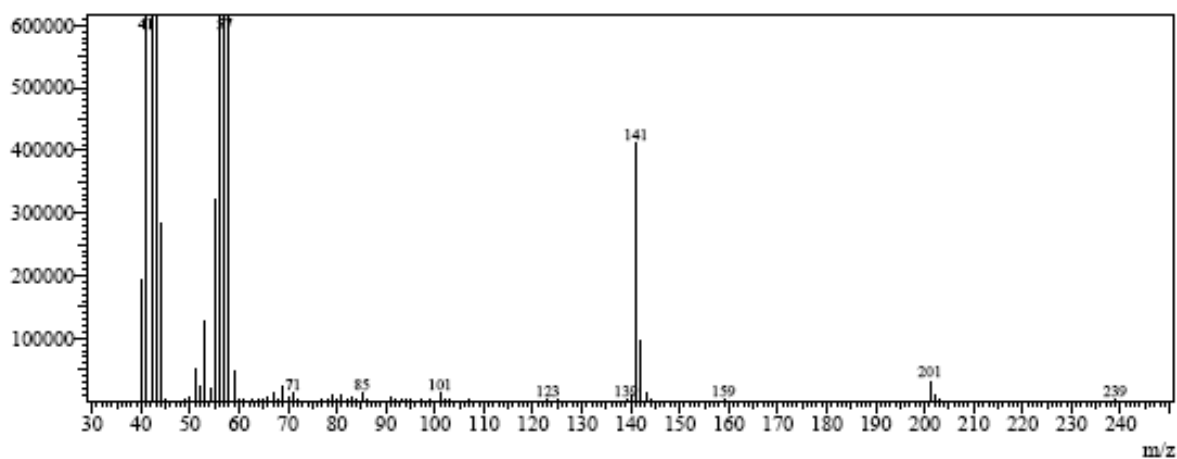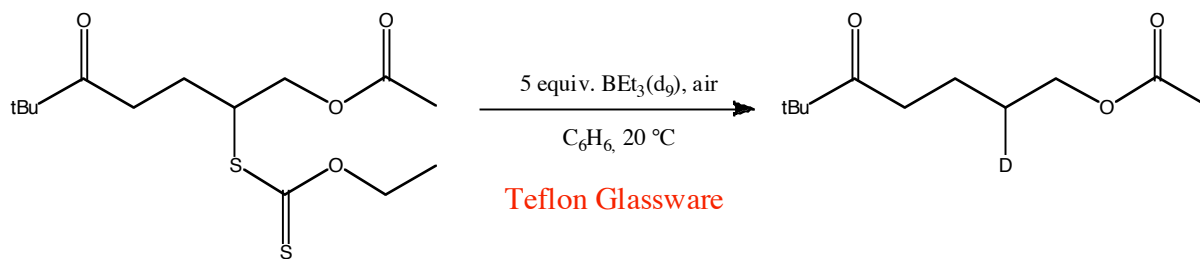

Line#:1 R.Time:5.967(Scan#:417)  
 MassPeaks:52  
 RawMode:Single 5.967(417) BasePeak:57.15(8388842)  
 BG Mode:None

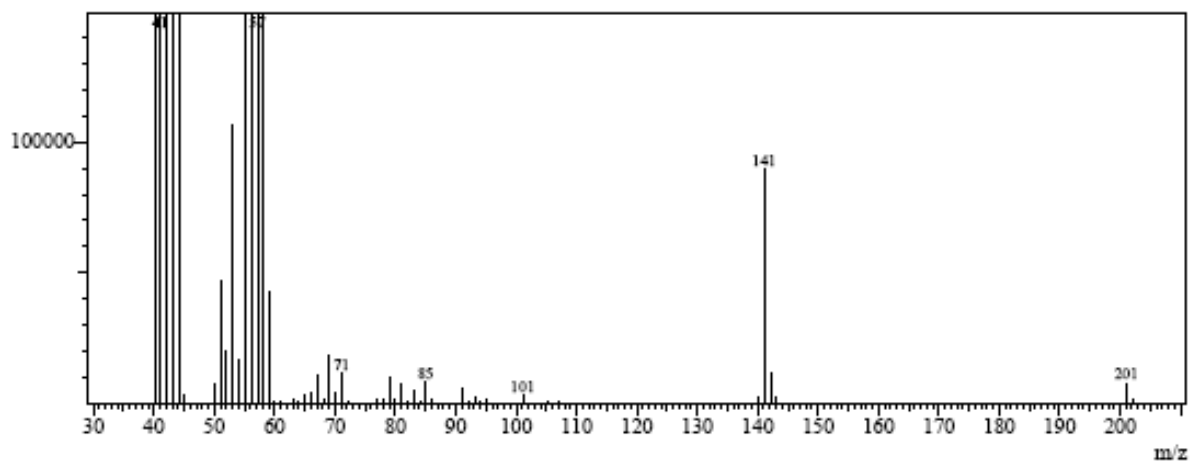

Deuterium incorporation measurements

| Table                                                                                     | Entry           | m/z 141 Integration | m/z 142 Integration | m/z 142 corrected for natural abundance | % Deuteration based on peaks 141/142 | m/z 201 Integration | m/z 202 Integration | m/z 202 corrected for natural abundance | % Deuteration based on peaks 201/202 | % Deuteration Average Value |  |
|-------------------------------------------------------------------------------------------|-----------------|---------------------|---------------------|-----------------------------------------|--------------------------------------|---------------------|---------------------|-----------------------------------------|--------------------------------------|-----------------------------|--|
| 1                                                                                         | 14 <sup>9</sup> | 350392              | 100713              | 35039,2                                 | 15,78                                | 70477               | 22312               | 9162,01                                 | 15,72                                | 15,75                       |  |
| <p>5 equiv. BEt<sub>3</sub>, air<br/>CDCl<sub>3</sub>, 20 °C</p>                          |                 |                     |                     |                                         |                                      |                     |                     |                                         |                                      |                             |  |
| 1                                                                                         | 19              | 816661              | 87221               | 81666,1                                 | 0,68                                 | 146383              | 19694               | 19029,79                                | 0,45                                 | 0,56                        |  |
| <p>5 equiv. BEt<sub>3</sub>, air<br/>THF(d), 20 °C</p>                                    |                 |                     |                     |                                         |                                      |                     |                     |                                         |                                      |                             |  |
| 2                                                                                         | 1               | 44780               | 4318                | 4478                                    | -0,36                                | 7795                | 943                 | 1013,35                                 | -0,91                                | -0,63                       |  |
| <p>5 equiv. BEt<sub>3</sub>, air<br/>C<sub>6</sub>H<sub>6</sub>, 20 °C</p>                |                 |                     |                     |                                         |                                      |                     |                     |                                         |                                      |                             |  |
| 2                                                                                         | 2               | 264669              | 25852               | 26466,9                                 | -0,23                                | 51900               | 6637                | 6747                                    | -0,21                                | -0,22                       |  |
| <p>5 equiv. BEt<sub>3</sub>, air<br/>C<sub>6</sub>H<sub>6</sub>, 20 °C</p>                |                 |                     |                     |                                         |                                      |                     |                     |                                         |                                      |                             |  |
| 2                                                                                         | 3               | 277333              | 27343               | 27733,3                                 | -0,14                                | 53010               | 6367                | 6891,3                                  | -1,00                                | -0,57                       |  |
| <p>5 equiv. BEt<sub>3</sub>, air<br/>C<sub>6</sub>H<sub>6</sub>, 20 °C</p>                |                 |                     |                     |                                         |                                      |                     |                     |                                         |                                      |                             |  |
| 3                                                                                         | 1               | 523335              | 97405               | 52333,5                                 | 7,93                                 | 104388              | 23466               | 13570,44                                | 8,66                                 | 8,29                        |  |
| <p>5 equiv. BEt<sub>3</sub>(d<sub>3</sub>), air<br/>C<sub>6</sub>H<sub>6</sub>, 20 °C</p> |                 |                     |                     |                                         |                                      |                     |                     |                                         |                                      |                             |  |

## Deuterium incorporation measurements

| Table                                                                                                               | Entry | m/z 141<br>Integration | m/z 142<br>Integration | m/z 142<br>corrected for<br>natural<br>abundance | % Deuteration<br>based on<br>peaks 141/142 | m/z 201<br>Integration | m/z 202<br>Integration | m/z 202<br>corrected for<br>natural<br>abundance | % Deuteration<br>based on<br>peaks 201/202 | % Deuteration<br>Average Value |
|---------------------------------------------------------------------------------------------------------------------|-------|------------------------|------------------------|--------------------------------------------------|--------------------------------------------|------------------------|------------------------|--------------------------------------------------|--------------------------------------------|--------------------------------|
| 3                                                                                                                   | 2     |                        | 50254                  | 26881,2                                          | 8,00                                       | 68919                  | 15497                  | 8959,47                                          | 8,66                                       | 8,33                           |
| <p>5 equiv. BEt<sub>3</sub>(d<sub>13</sub>), air<br/>C<sub>6</sub>H<sub>6</sub>, 20 °C</p>                          |       |                        |                        |                                                  |                                            |                        |                        |                                                  |                                            |                                |
| 3                                                                                                                   | 3     | 545903                 | 255493                 | 54590,3                                          | 26,90                                      | 108257                 | 53232                  | 14073,41                                         | 26,56                                      | 26,73                          |
| <p>5 equiv. BEt<sub>3</sub>(d<sub>13</sub>), air<br/>C<sub>6</sub>H<sub>6</sub>, 20 °C<br/>Teflon glassware</p>     |       |                        |                        |                                                  |                                            |                        |                        |                                                  |                                            |                                |
| 3                                                                                                                   | 4     | 416641                 | 190454                 | 41664,1                                          | 26,31                                      | 87873                  | 41393                  | 11423,49                                         | 25,43                                      | 25,87                          |
| <p>5 equiv. BEt<sub>3</sub>(d<sub>15</sub>), air<br/>C<sub>6</sub>H<sub>6</sub>, 20 °C<br/>Teflon glassware</p>     |       |                        |                        |                                                  |                                            |                        |                        |                                                  |                                            |                                |
| 3                                                                                                                   | 5     | 410239                 | 94345                  | 41023,9                                          | 11,50                                      | 31783                  | 9420                   | 4131,79                                          | 14,27                                      | 12,88                          |
| <p>5 equiv. BEt<sub>3</sub>(d<sub>9</sub>), air<br/>C<sub>6</sub>H<sub>6</sub>, 20 °C<br/>Teflon Glassware</p>      |       |                        |                        |                                                  |                                            |                        |                        |                                                  |                                            |                                |
| 3                                                                                                                   | 6     | 89743                  | 11724                  | 8974,3                                           | 2,97                                       | 7591                   | 1303                   | 986,83                                           | 4,00                                       | 3,49                           |
| <p>5 equiv. BEt<sub>3</sub>(d<sub>9</sub>), air<br/>C<sub>6</sub>H<sub>6</sub>, 20 °C<br/>Teflon Glassware</p>      |       |                        |                        |                                                  |                                            |                        |                        |                                                  |                                            |                                |
| 3                                                                                                                   | 7     | 523335                 | 97405                  | 52333,5                                          | 7,93                                       | 104388                 | 23466                  | 13570,44                                         | 8,66                                       | 8,29                           |
| <p>5 equiv. BEt<sub>3</sub>(d<sub>13</sub>), air<br/>C<sub>6</sub>H<sub>6</sub>, 20 °C<br/>Teflon + Glass rings</p> |       |                        |                        |                                                  |                                            |                        |                        |                                                  |                                            |                                |

Deuterium incorporation measurements

| Table | Entry | m/z 141<br>Integration | m/z 142<br>Integration | m/z 142<br>corrected for<br>natural<br>abundance | % Deuteration<br>based on<br>peaks 141/142 | m/z 201<br>Integration | m/z 202<br>Integration | m/z 202<br>corrected for<br>natural<br>abundance | % Deuteration<br>based on<br>peaks 201/202 | % Deuteration<br>Average Value |
|-------|-------|------------------------|------------------------|--------------------------------------------------|--------------------------------------------|------------------------|------------------------|--------------------------------------------------|--------------------------------------------|--------------------------------|
|-------|-------|------------------------|------------------------|--------------------------------------------------|--------------------------------------------|------------------------|------------------------|--------------------------------------------------|--------------------------------------------|--------------------------------|

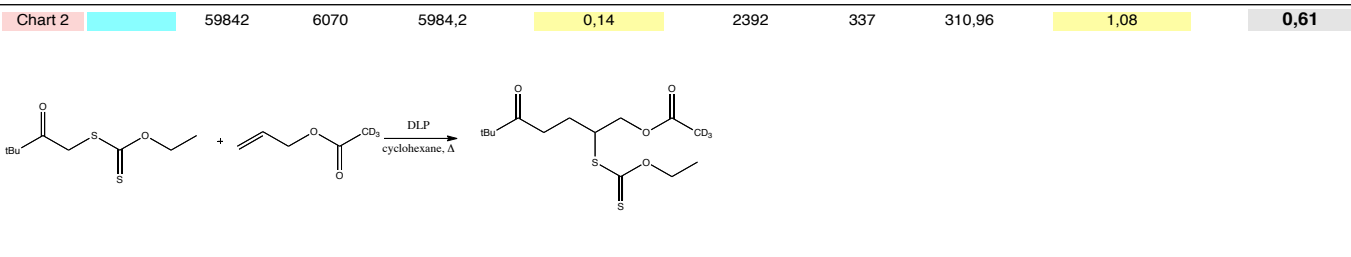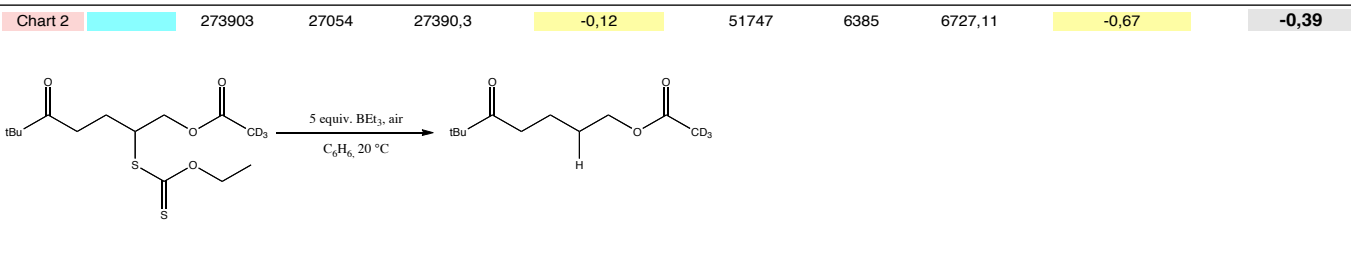

Supplement: Beilstein_J_Org_Chem-03-46-s004.pdf [file Beilstein_J_Org_Chem-03-46-s004.pdf]
