# Supplementary material for: Part 2. Mechanistic aspects of the reduction of S-alkyl-thionocarbonates in the presence of triethylborane and air
Source: PubMed Central journal article supplement (PMC2213662; doi:10.1186/1860-5397-3-46), 2007-12-12
Supplement: Beilstein_J_Org_Chem-03-46-s003.pdf [file Beilstein_J_Org_Chem-03-46-s003.pdf]

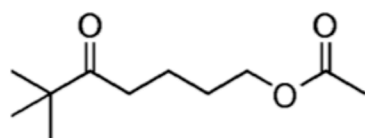

**1b**

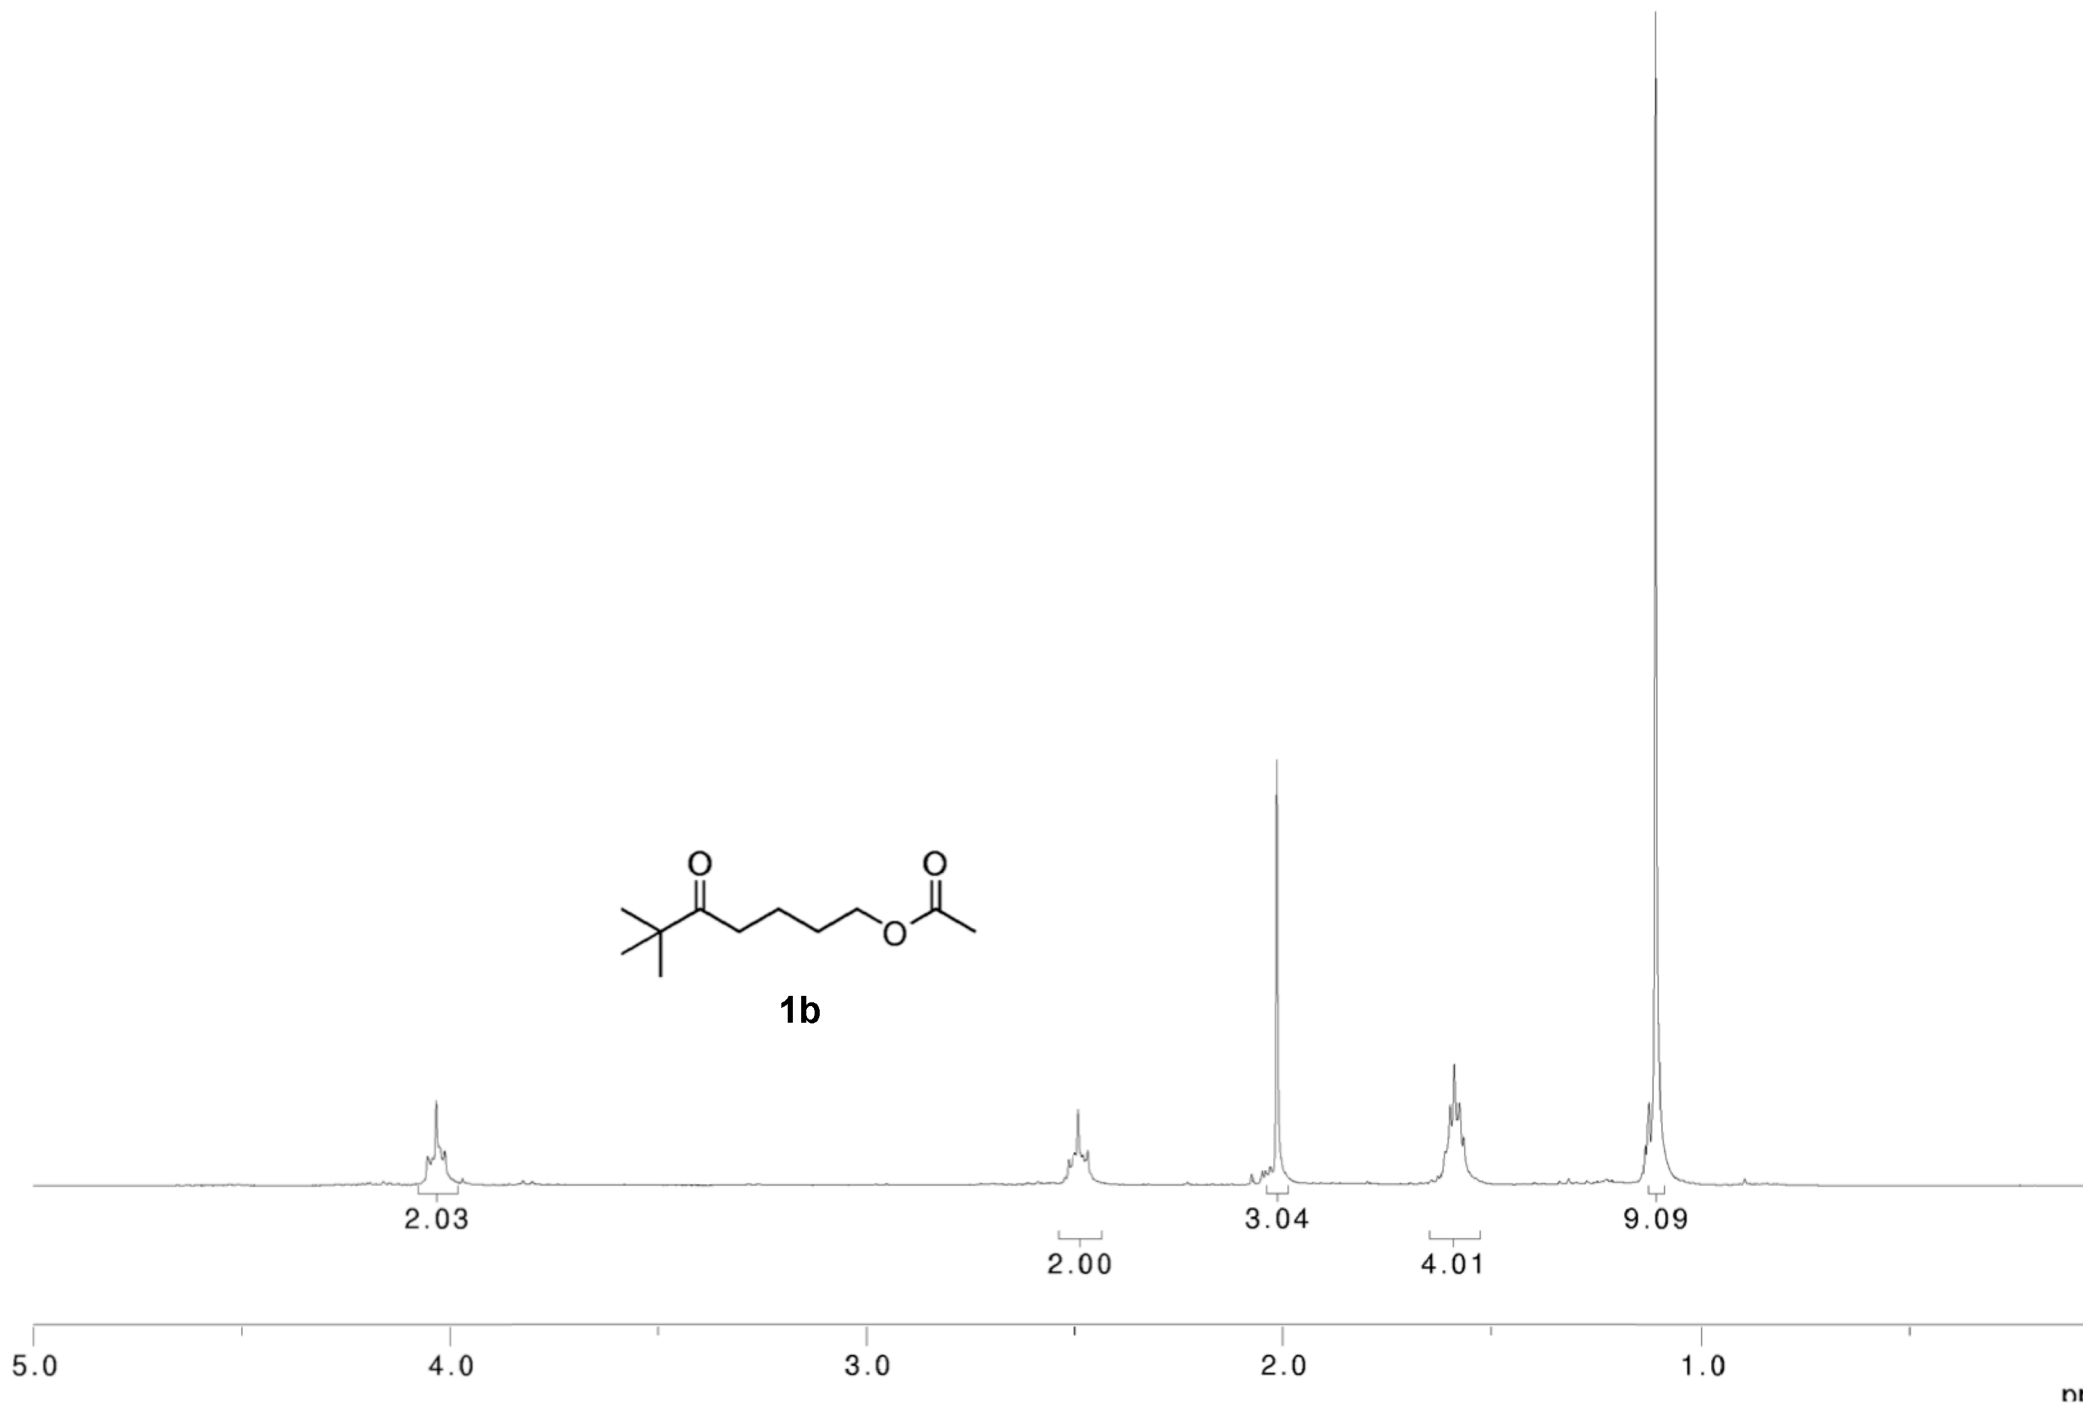

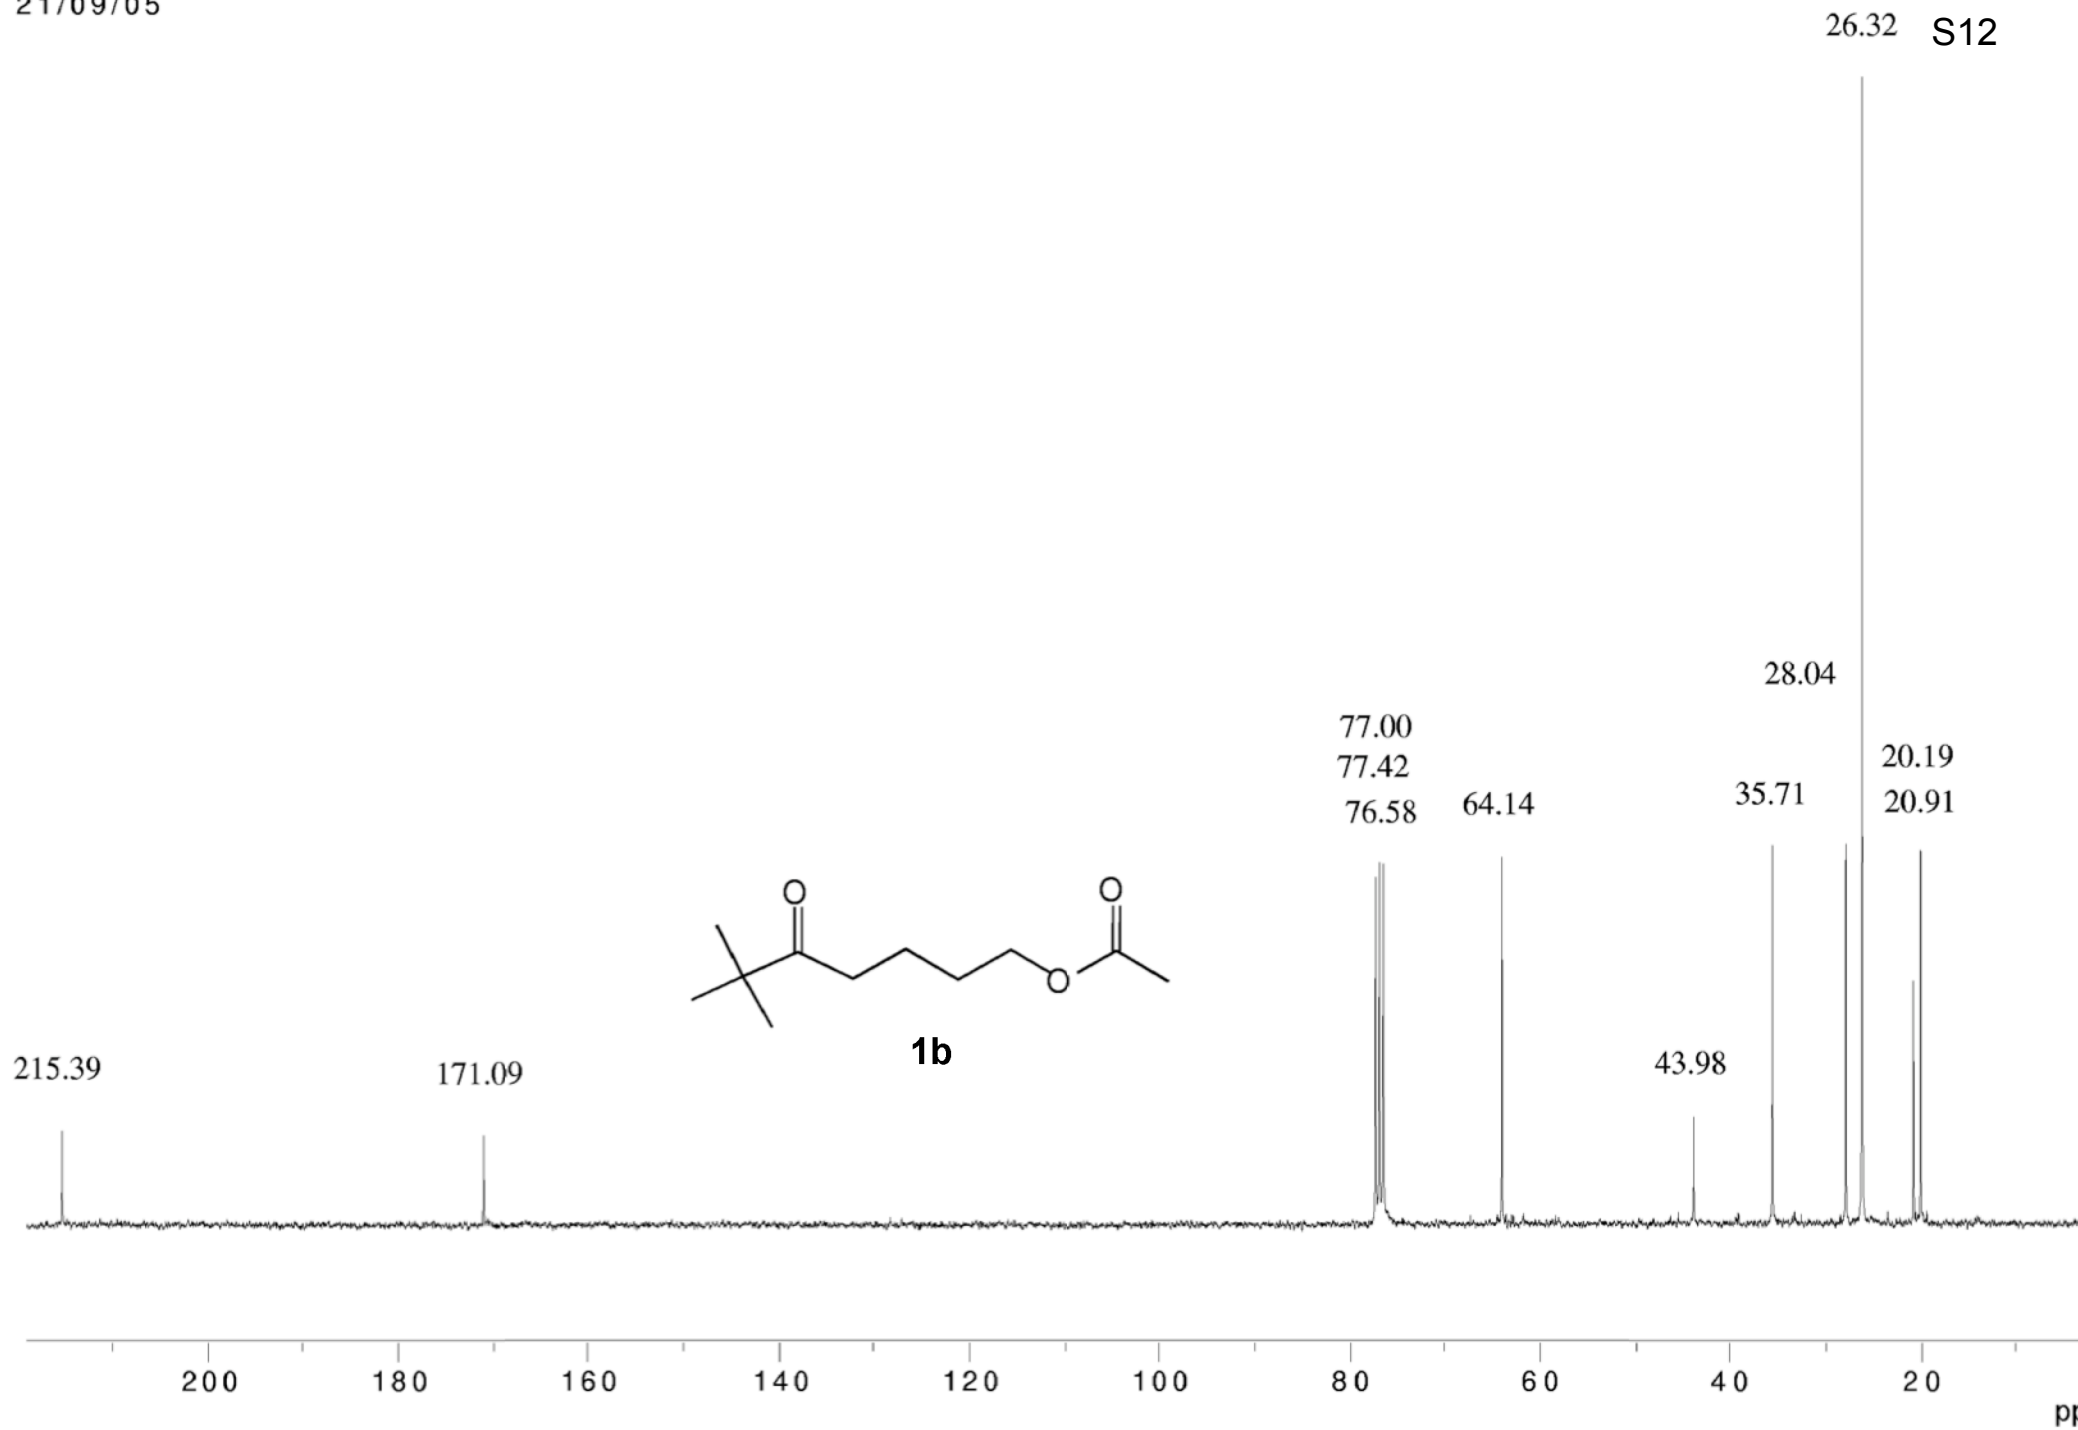

t235f5.cosy  
21/09/05

S13

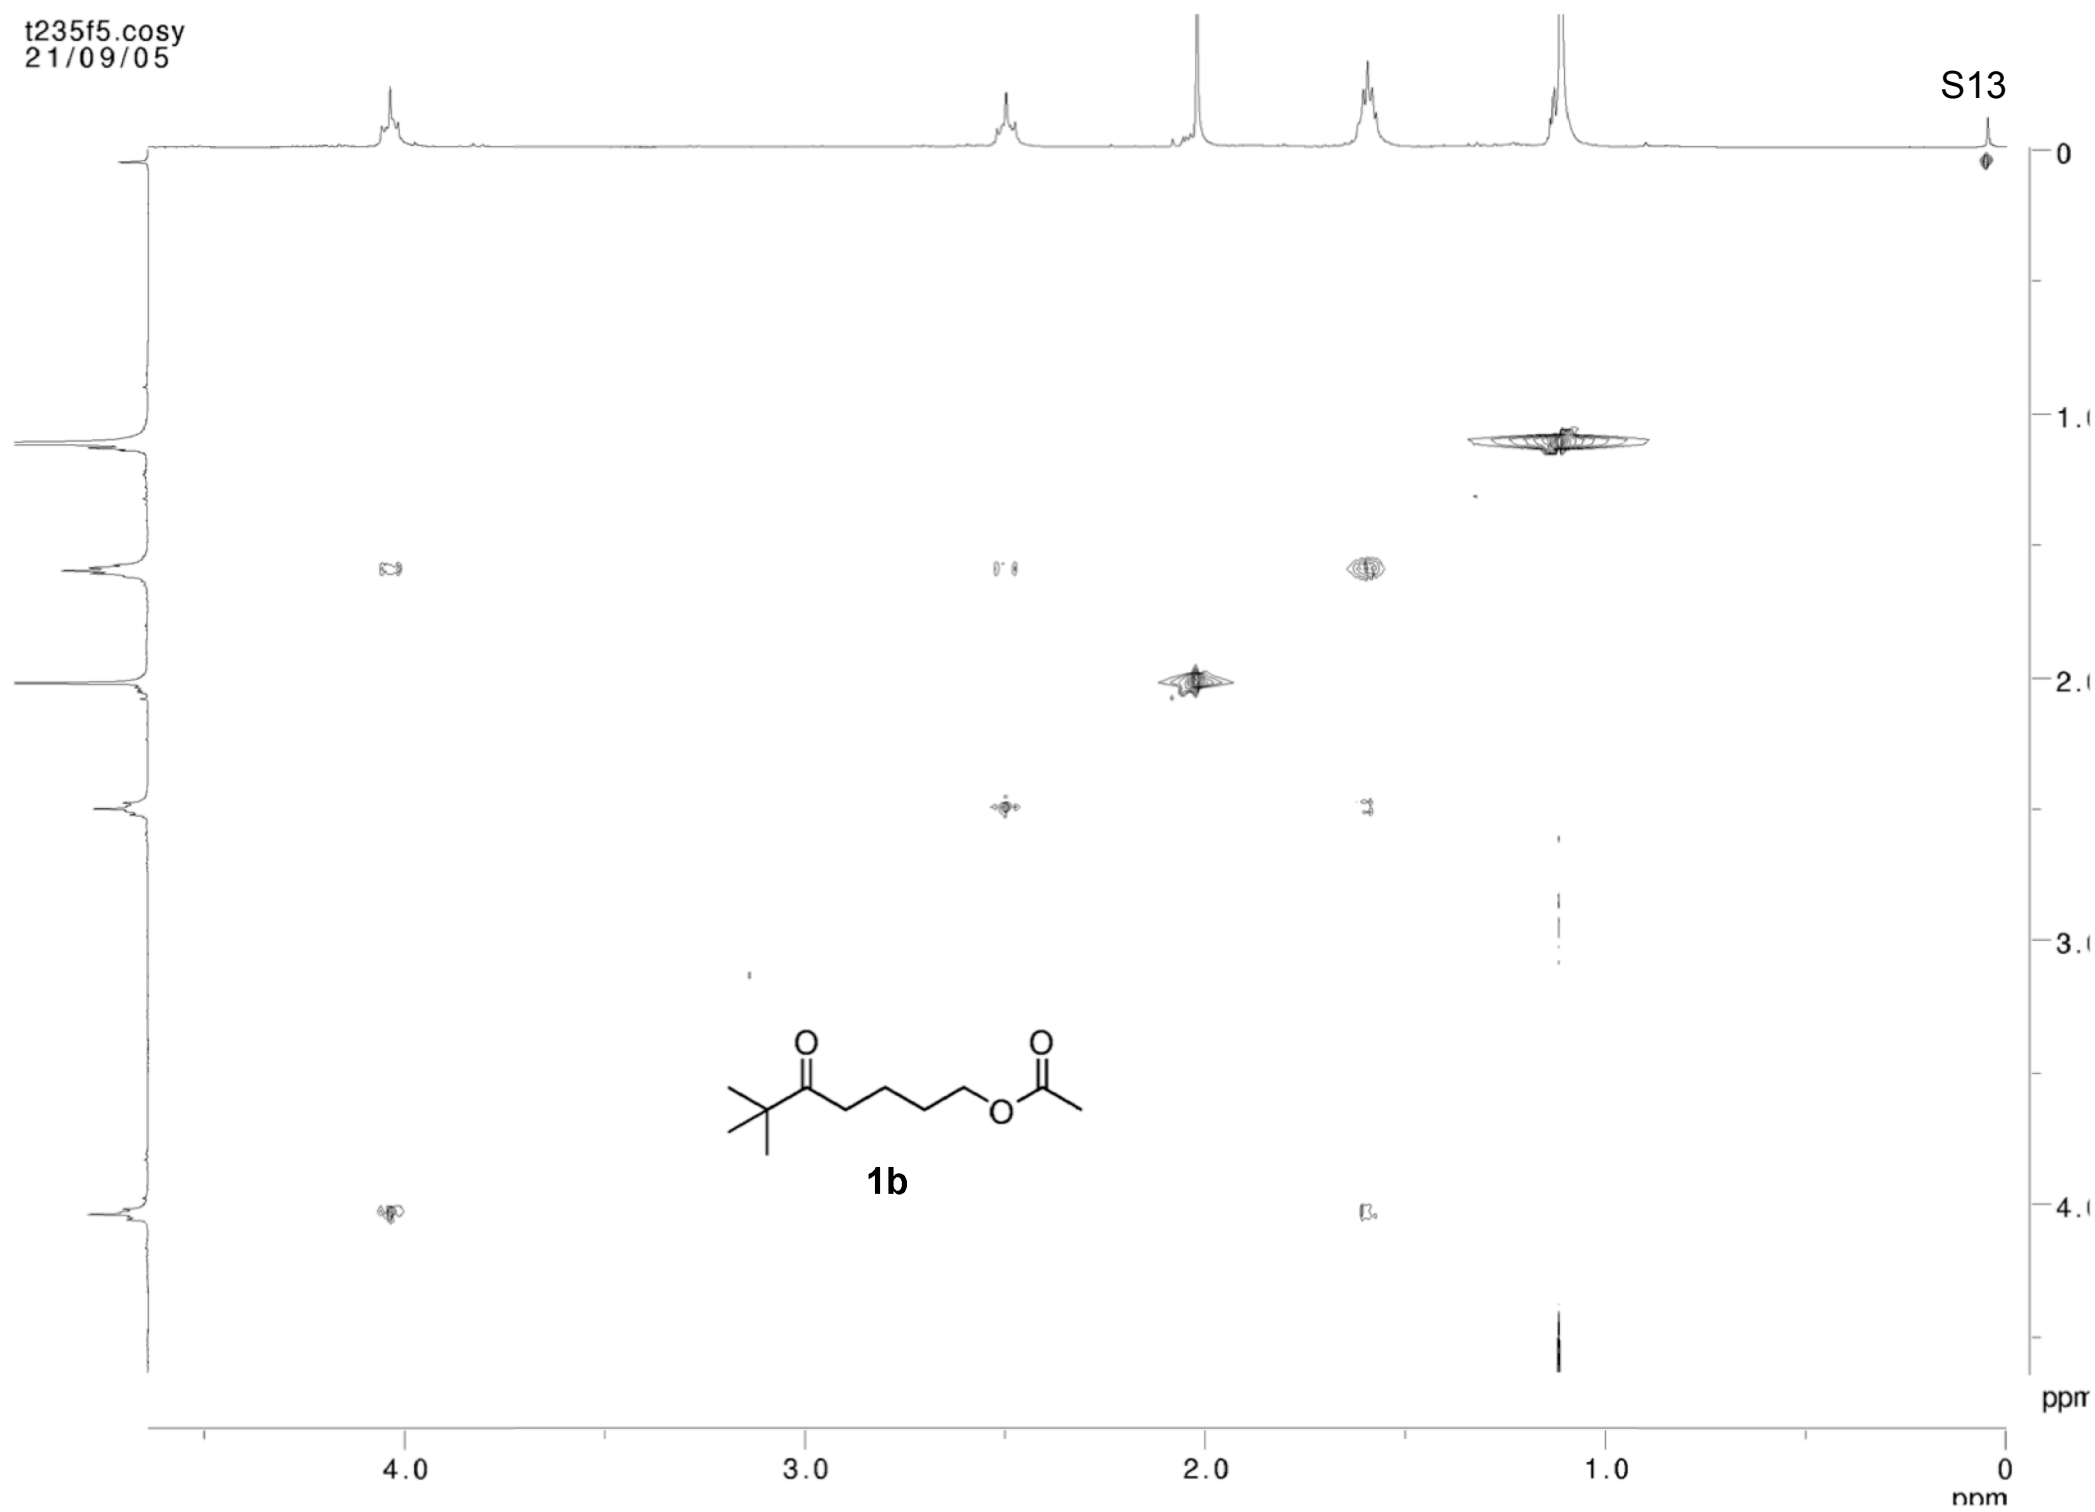

t235f5.dept  
21/09/05

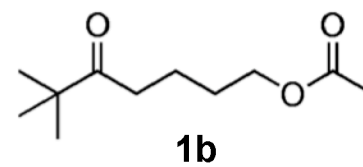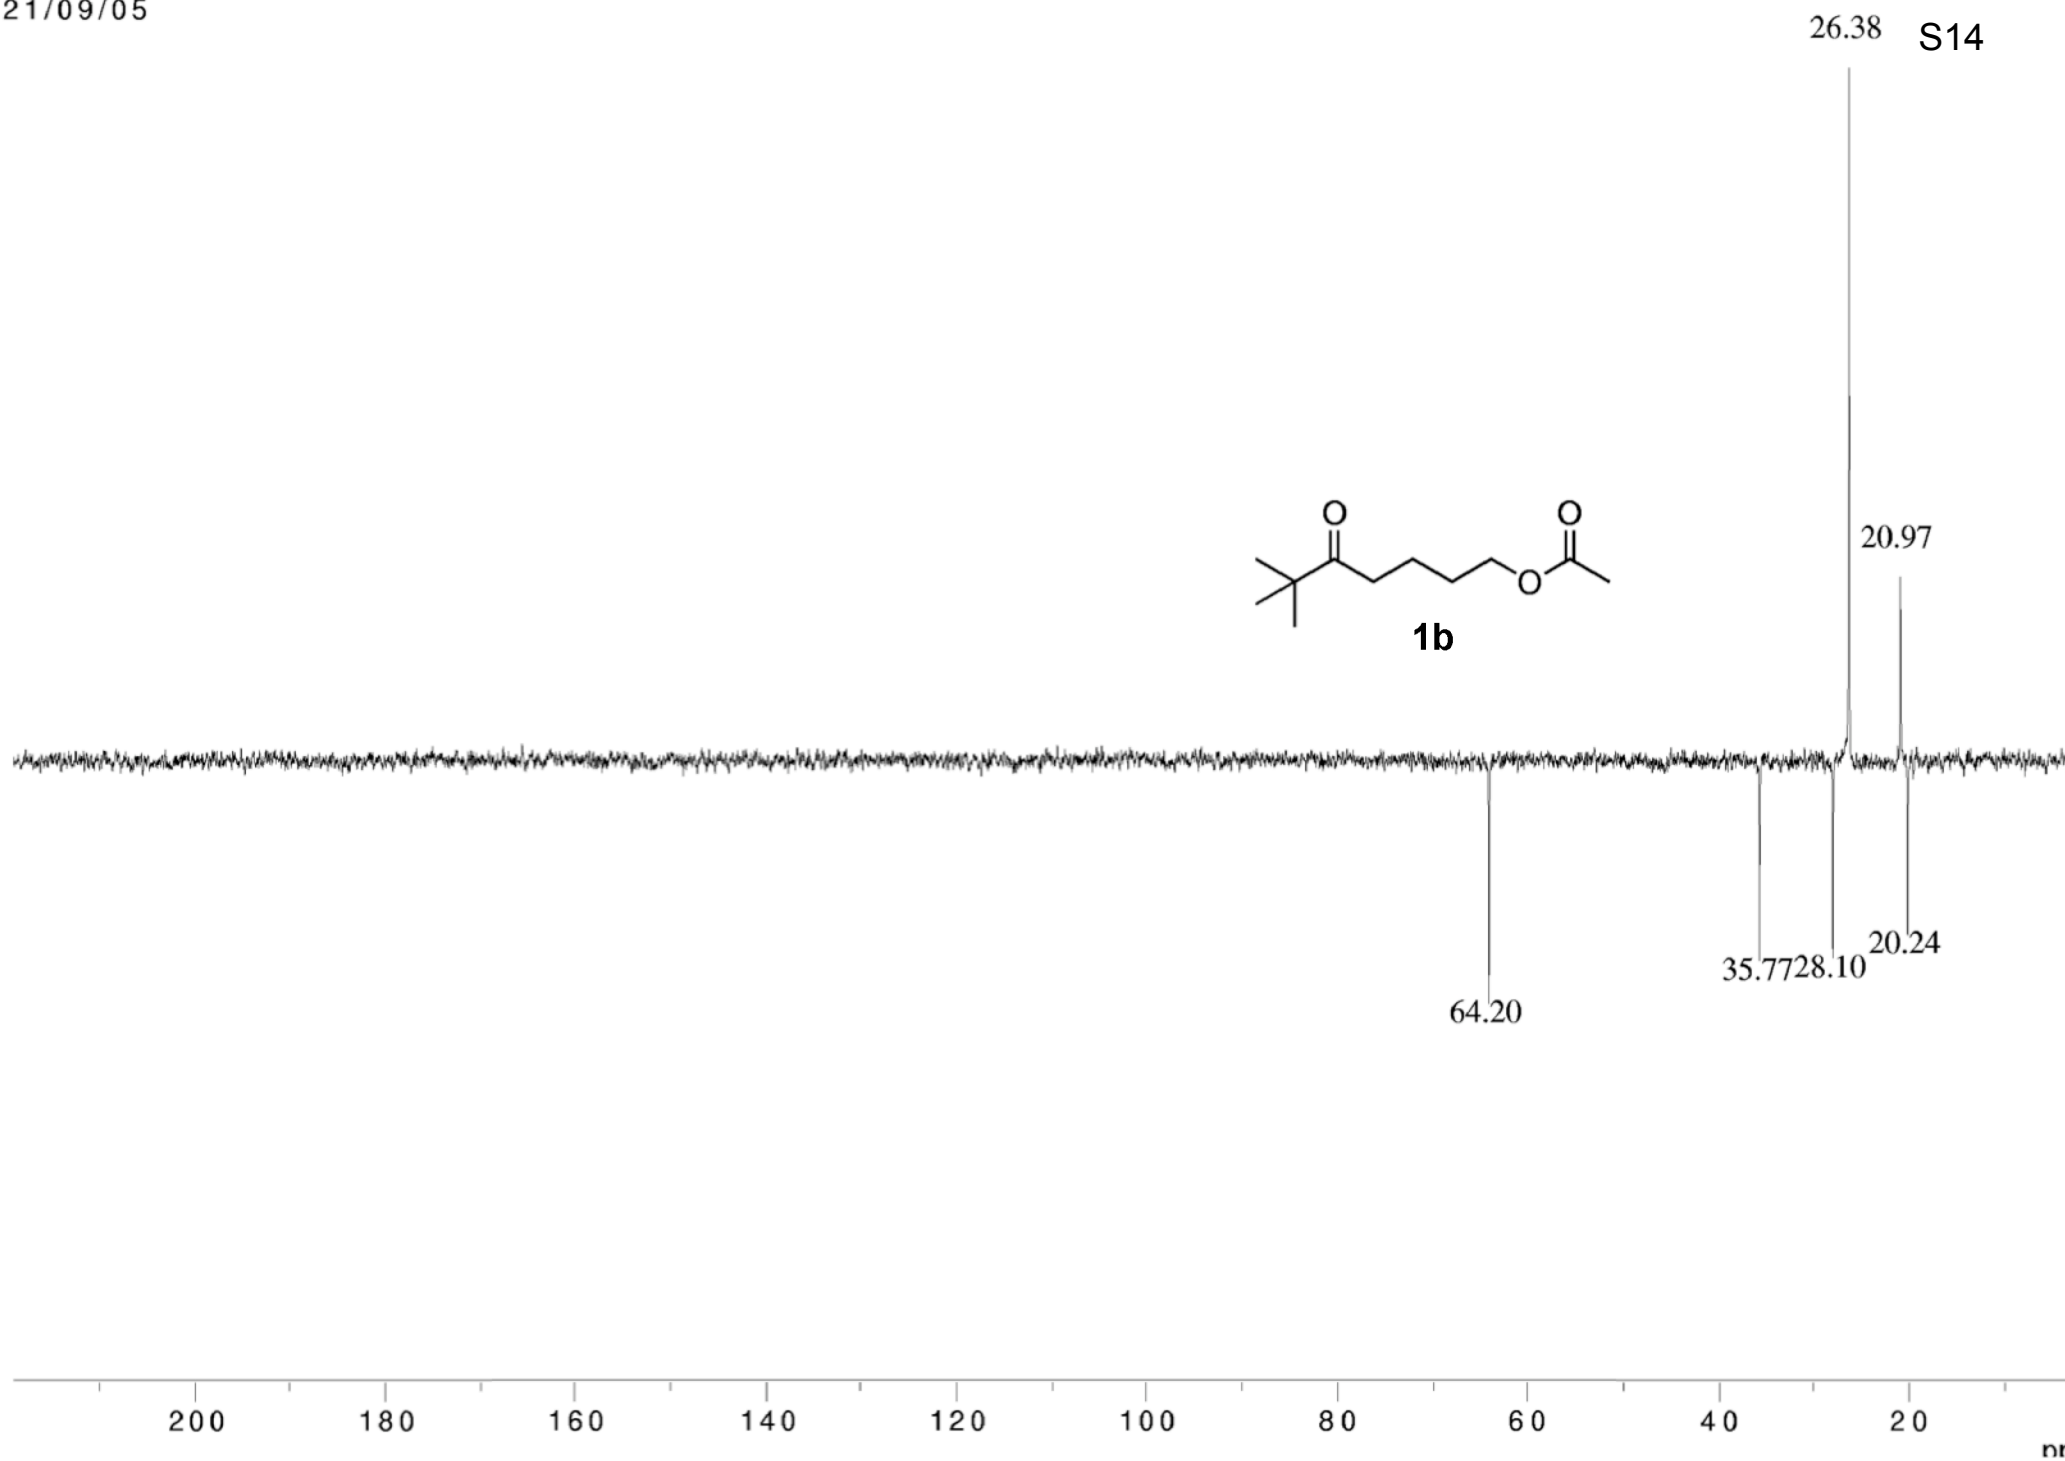



t235f5.hmqc  
21/09/05

S15

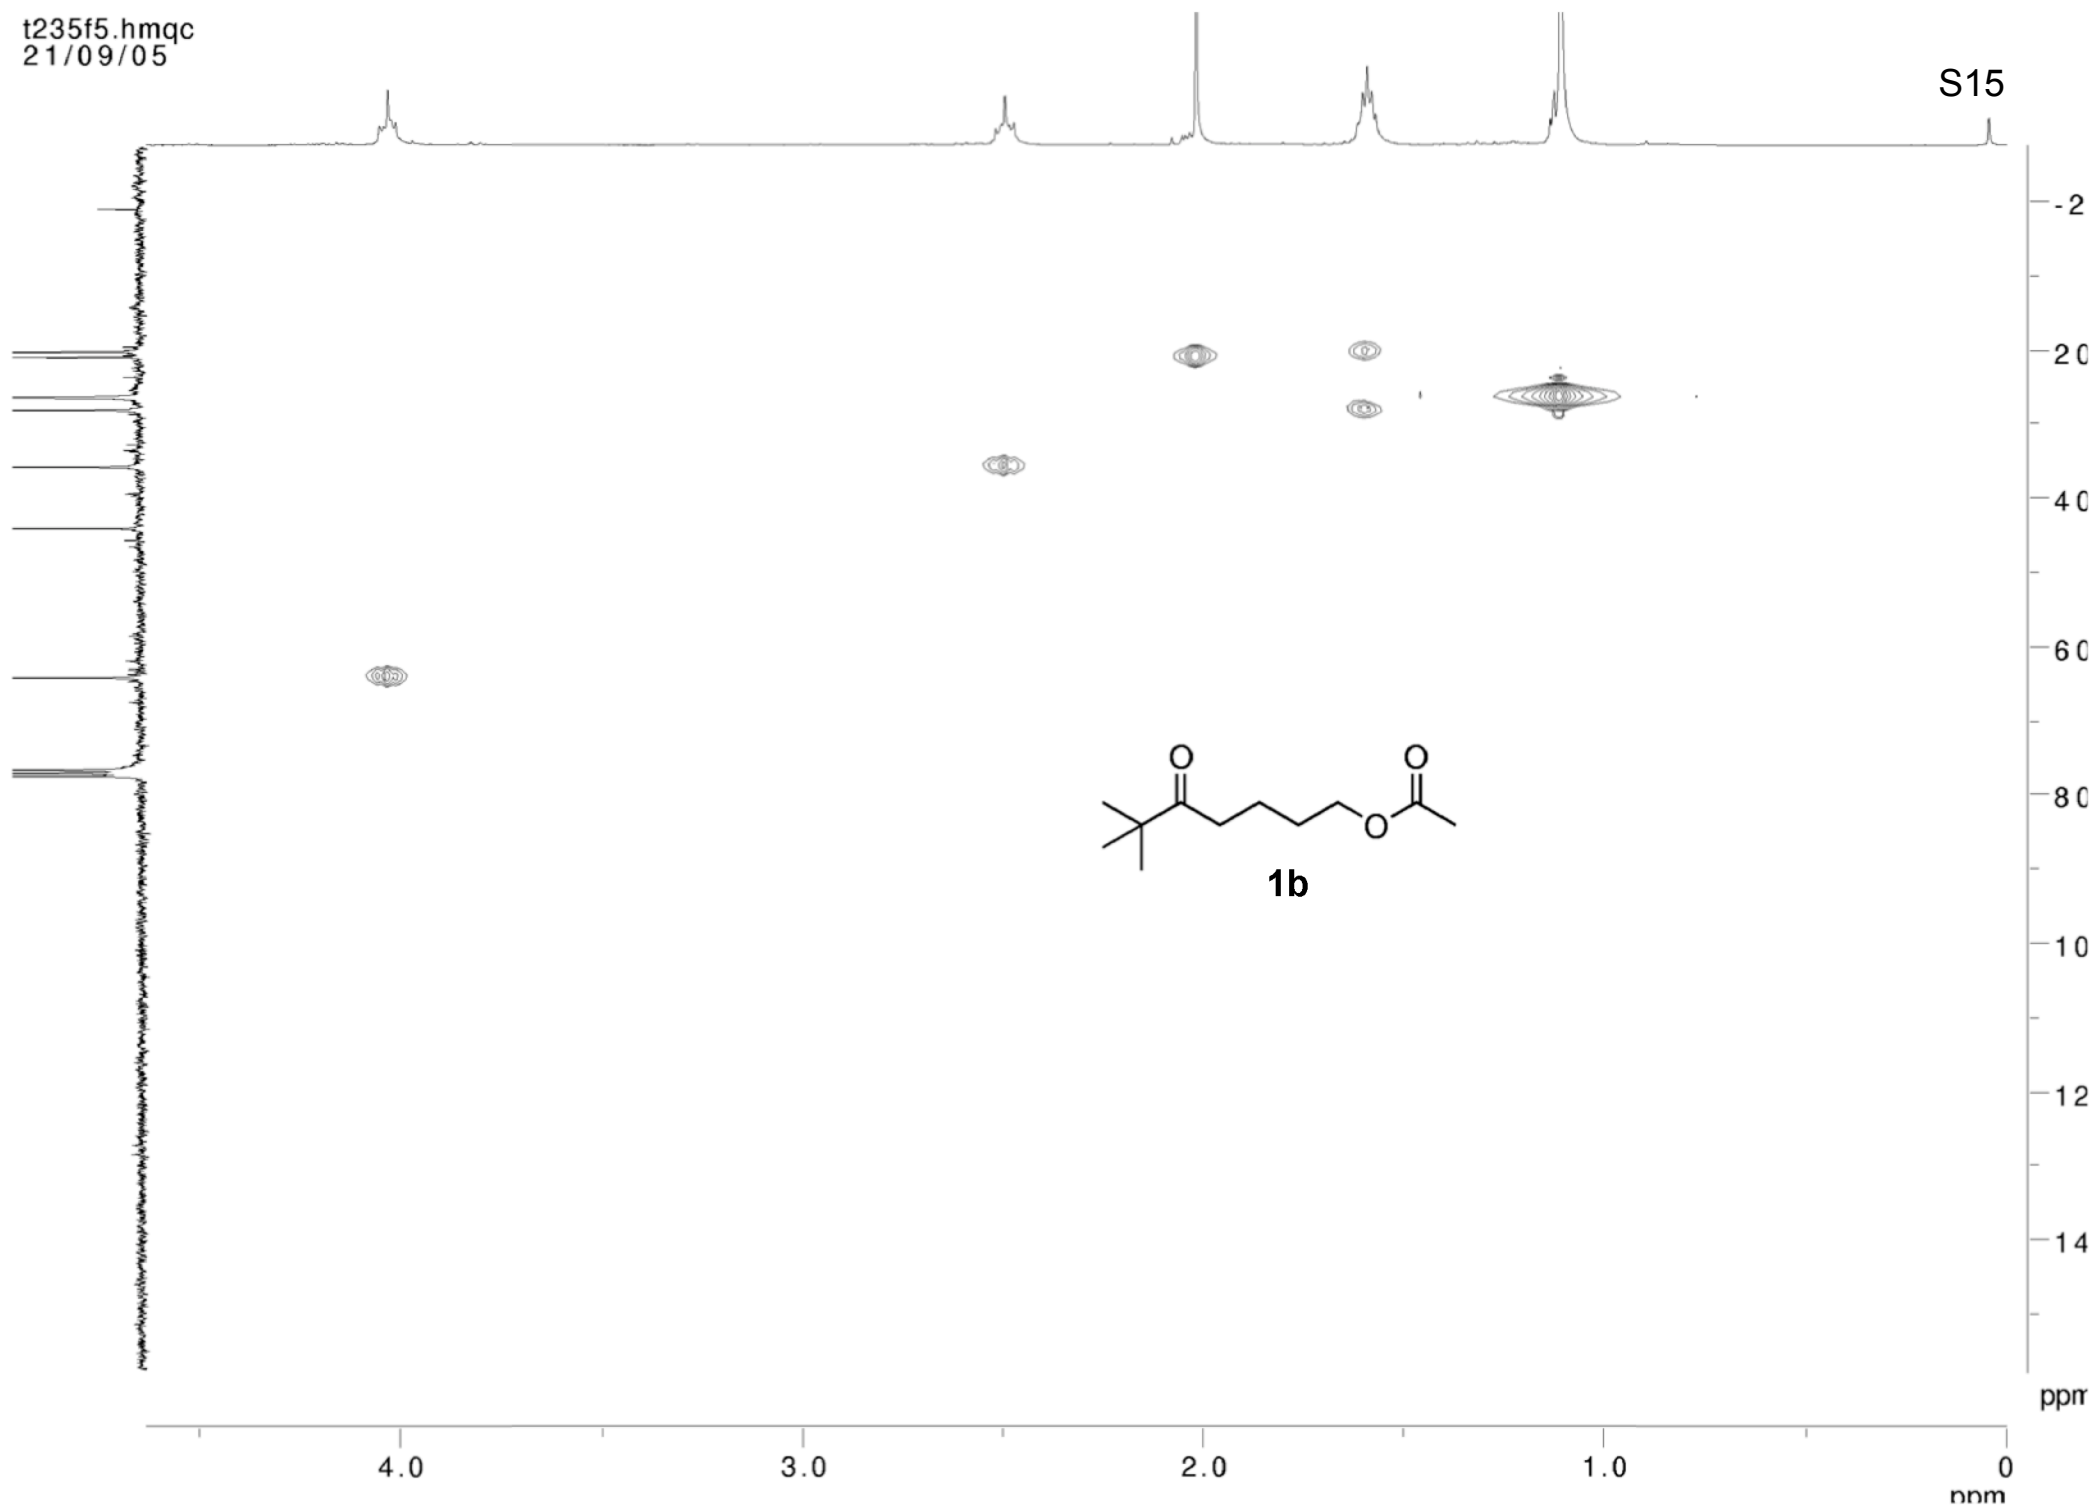

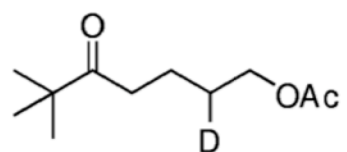

1c

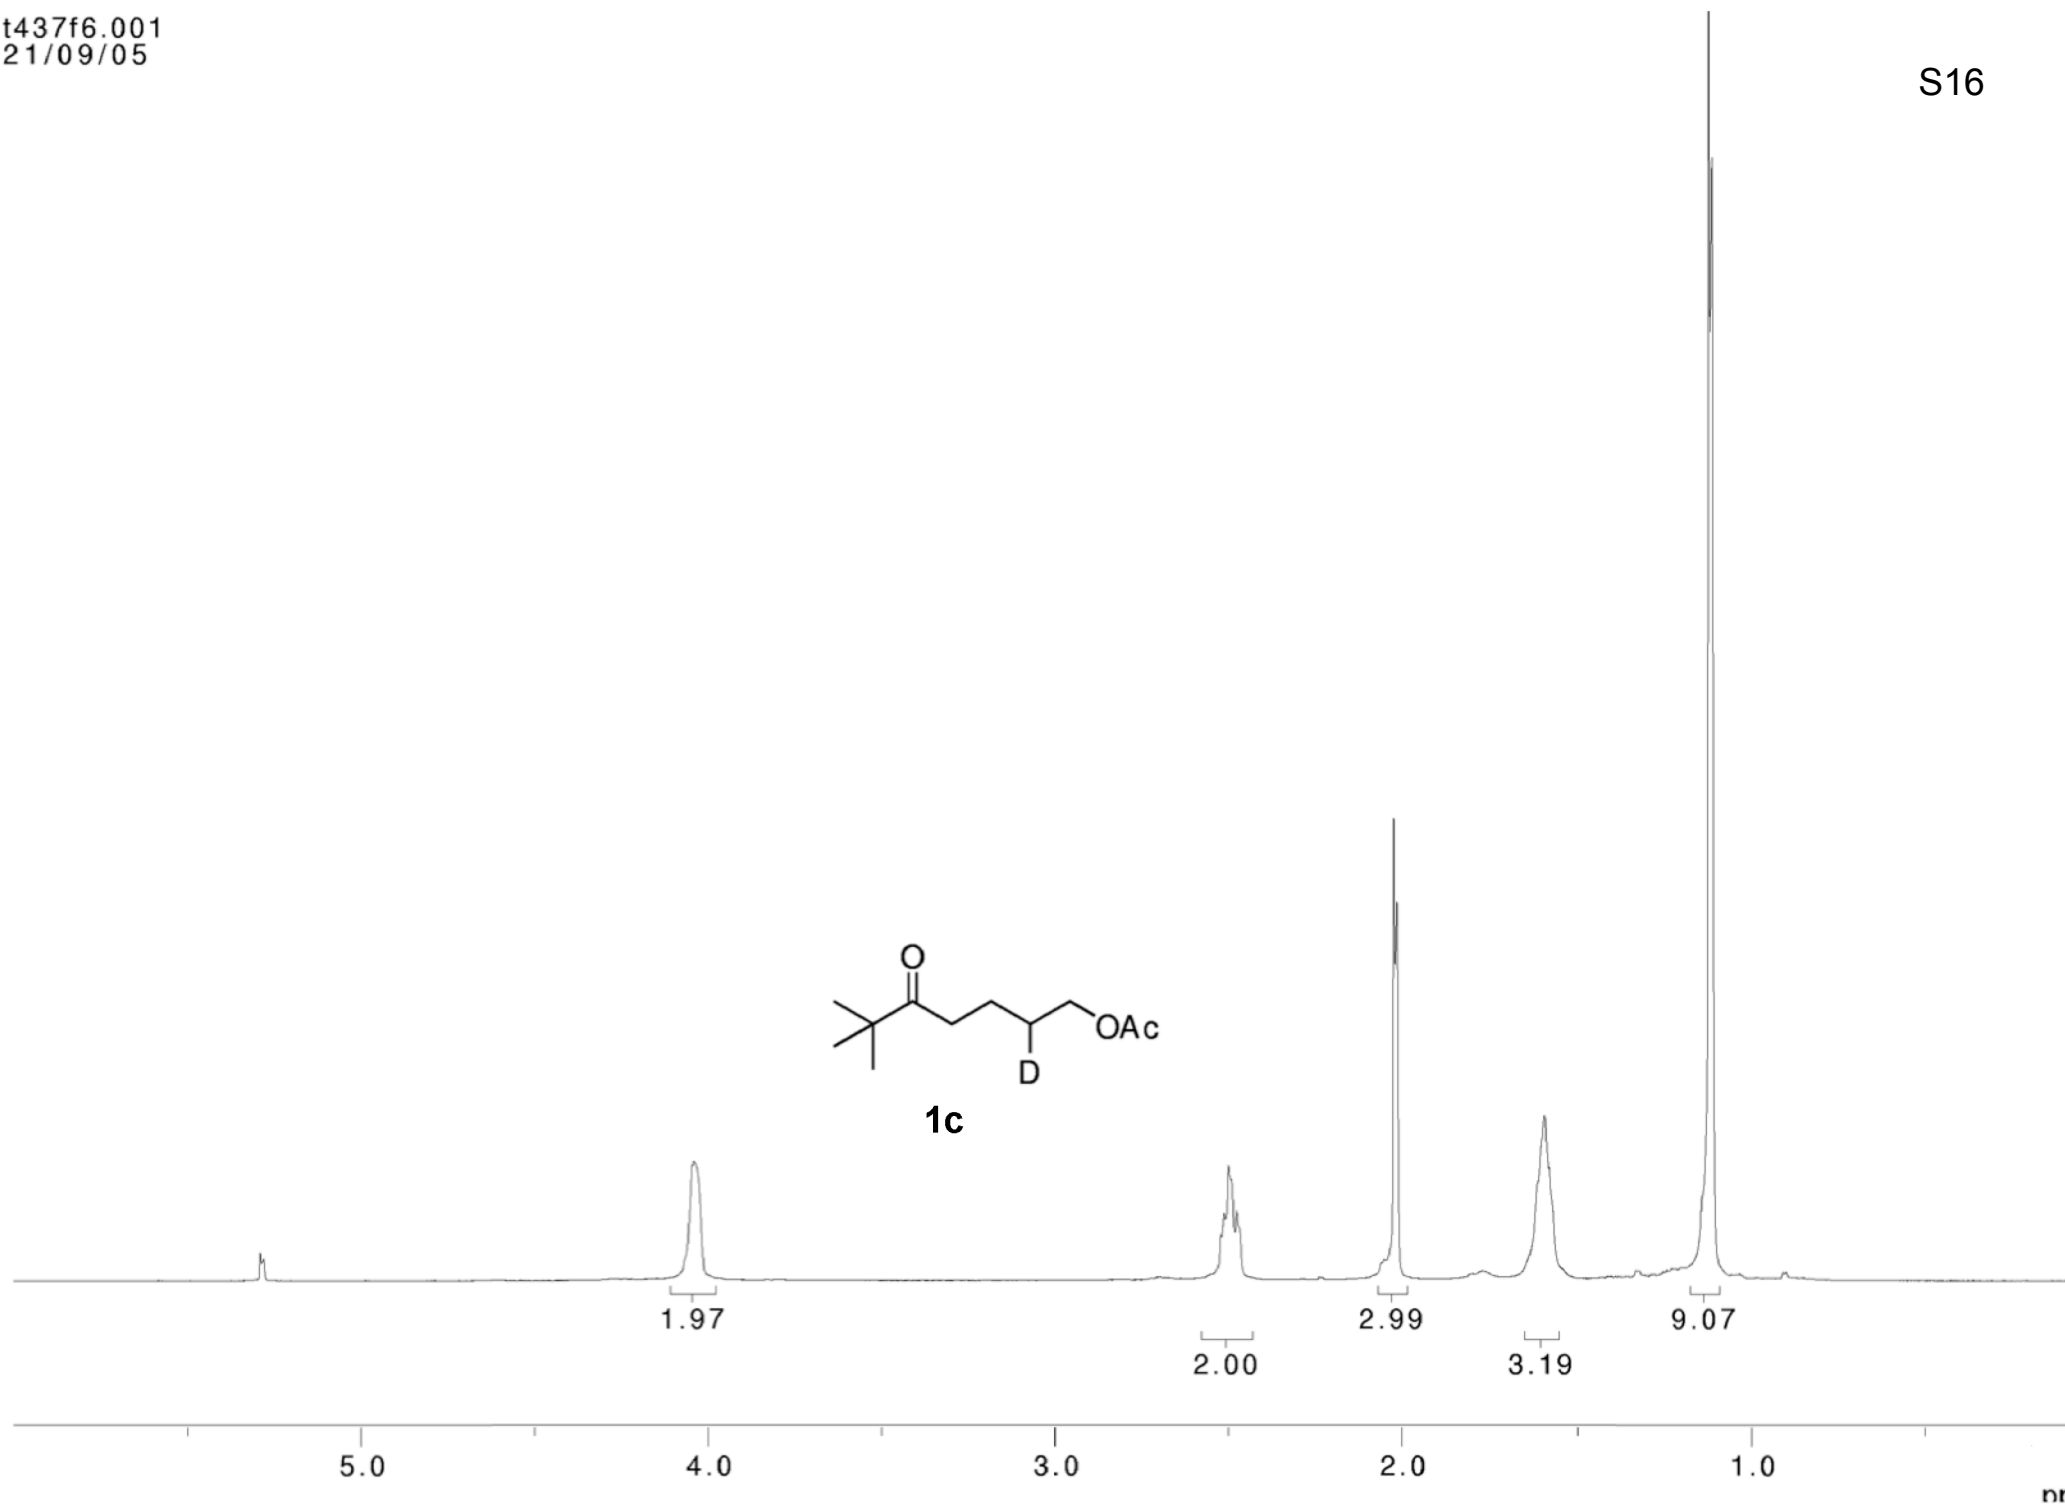

t437f6.013  
21/09/05

26.36 S17

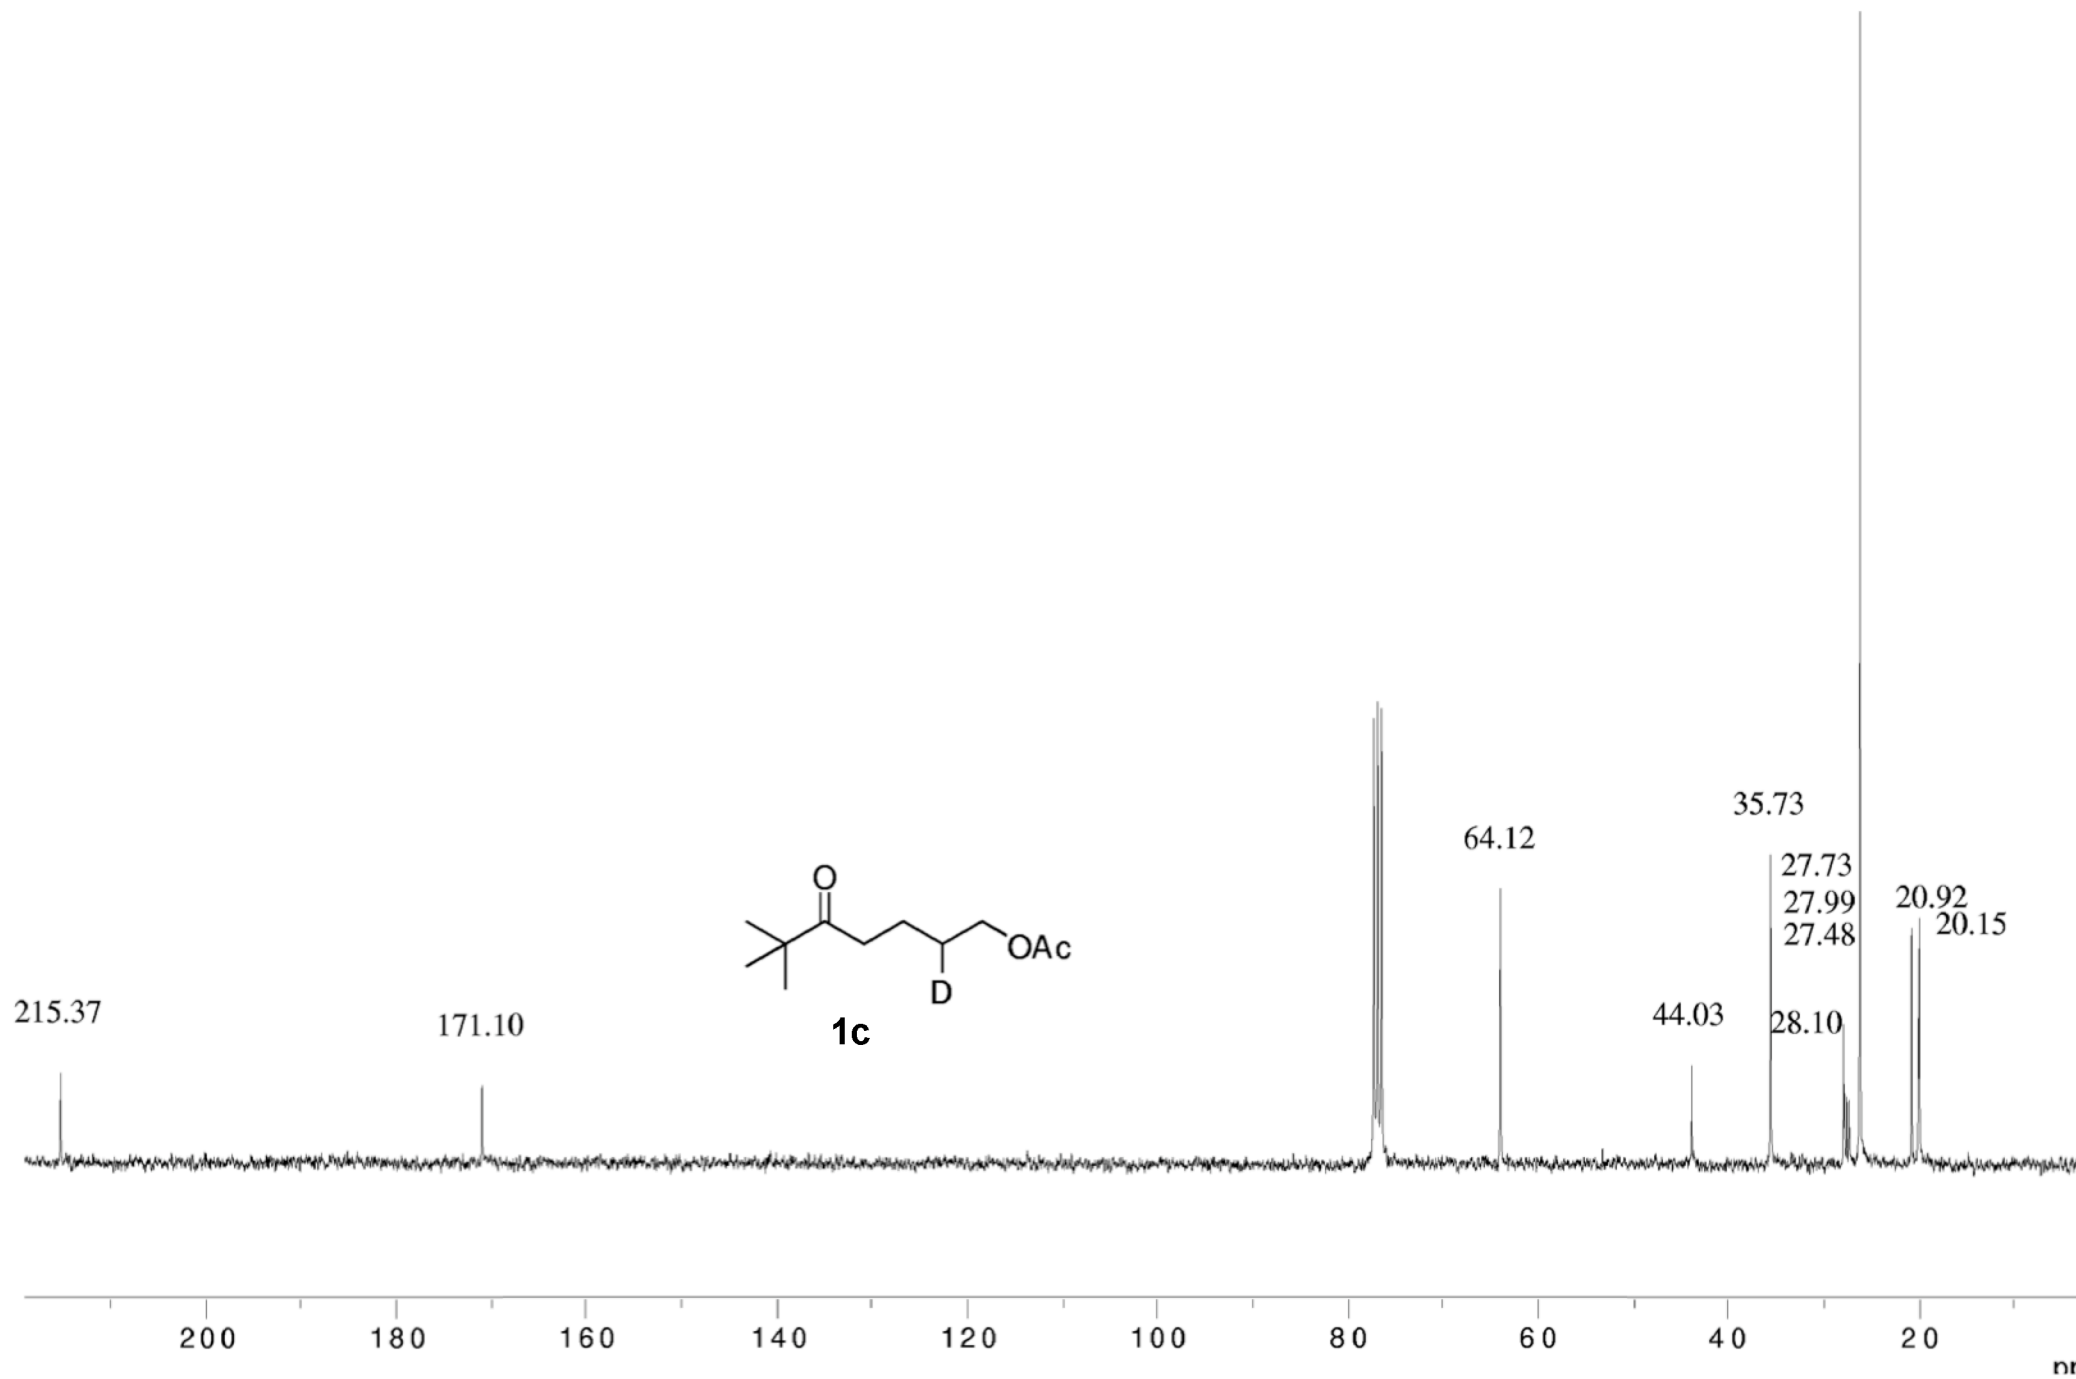

t437f6.cosy  
21/09/05

S18

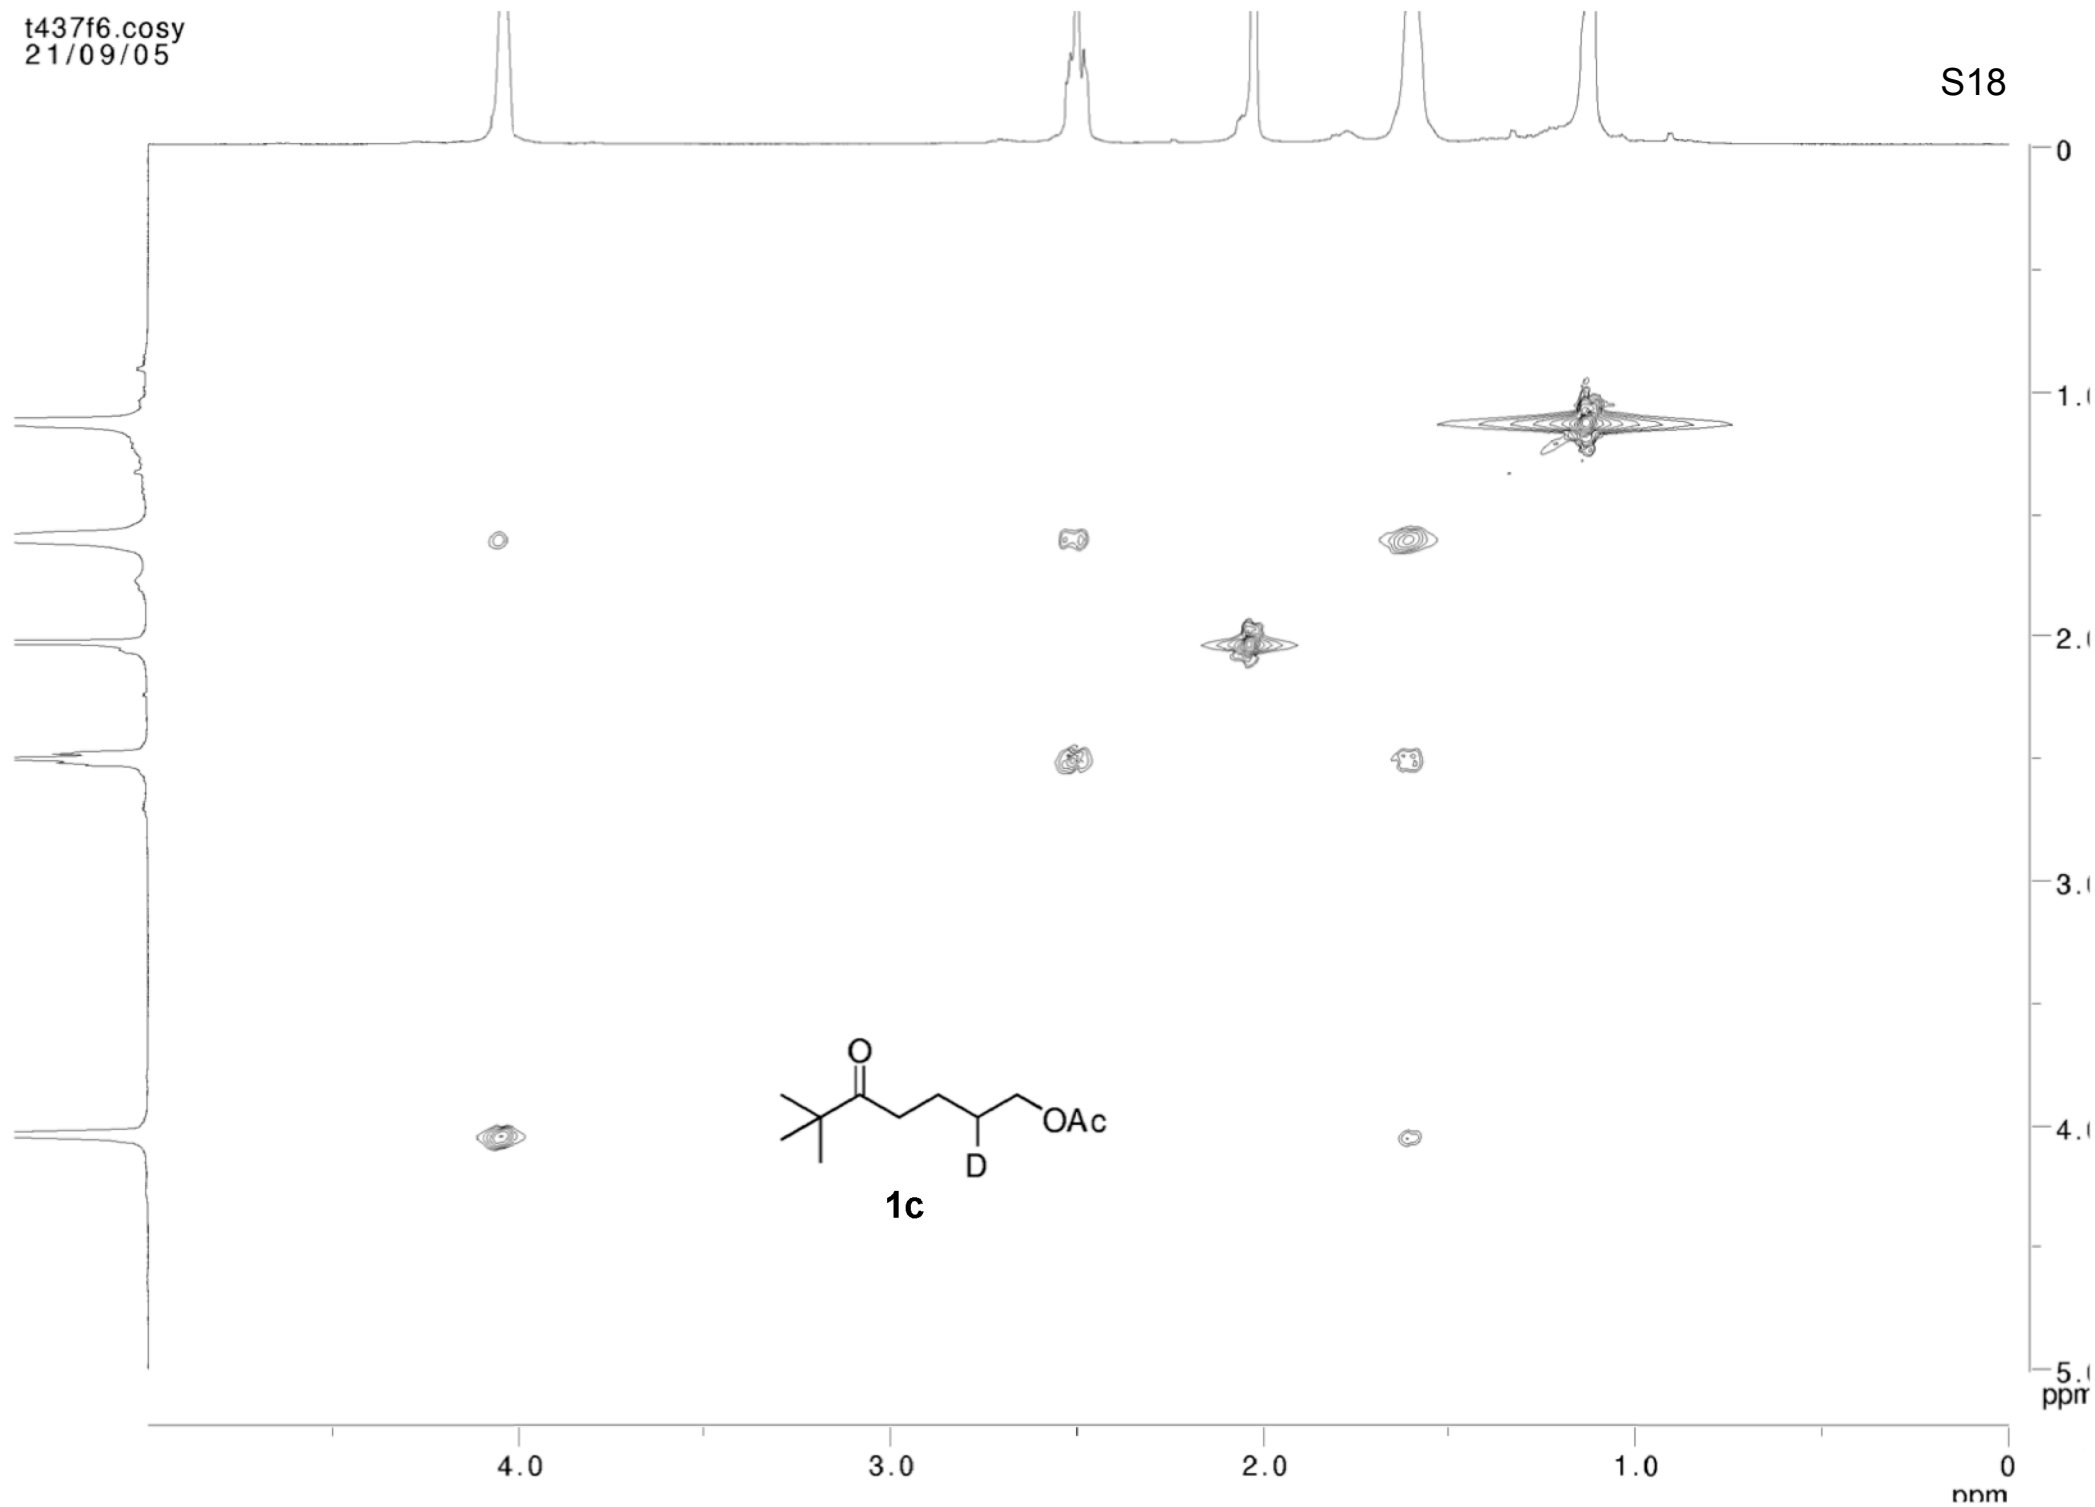

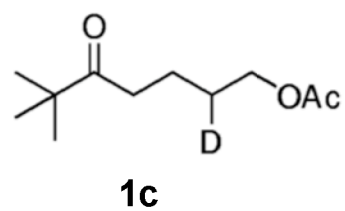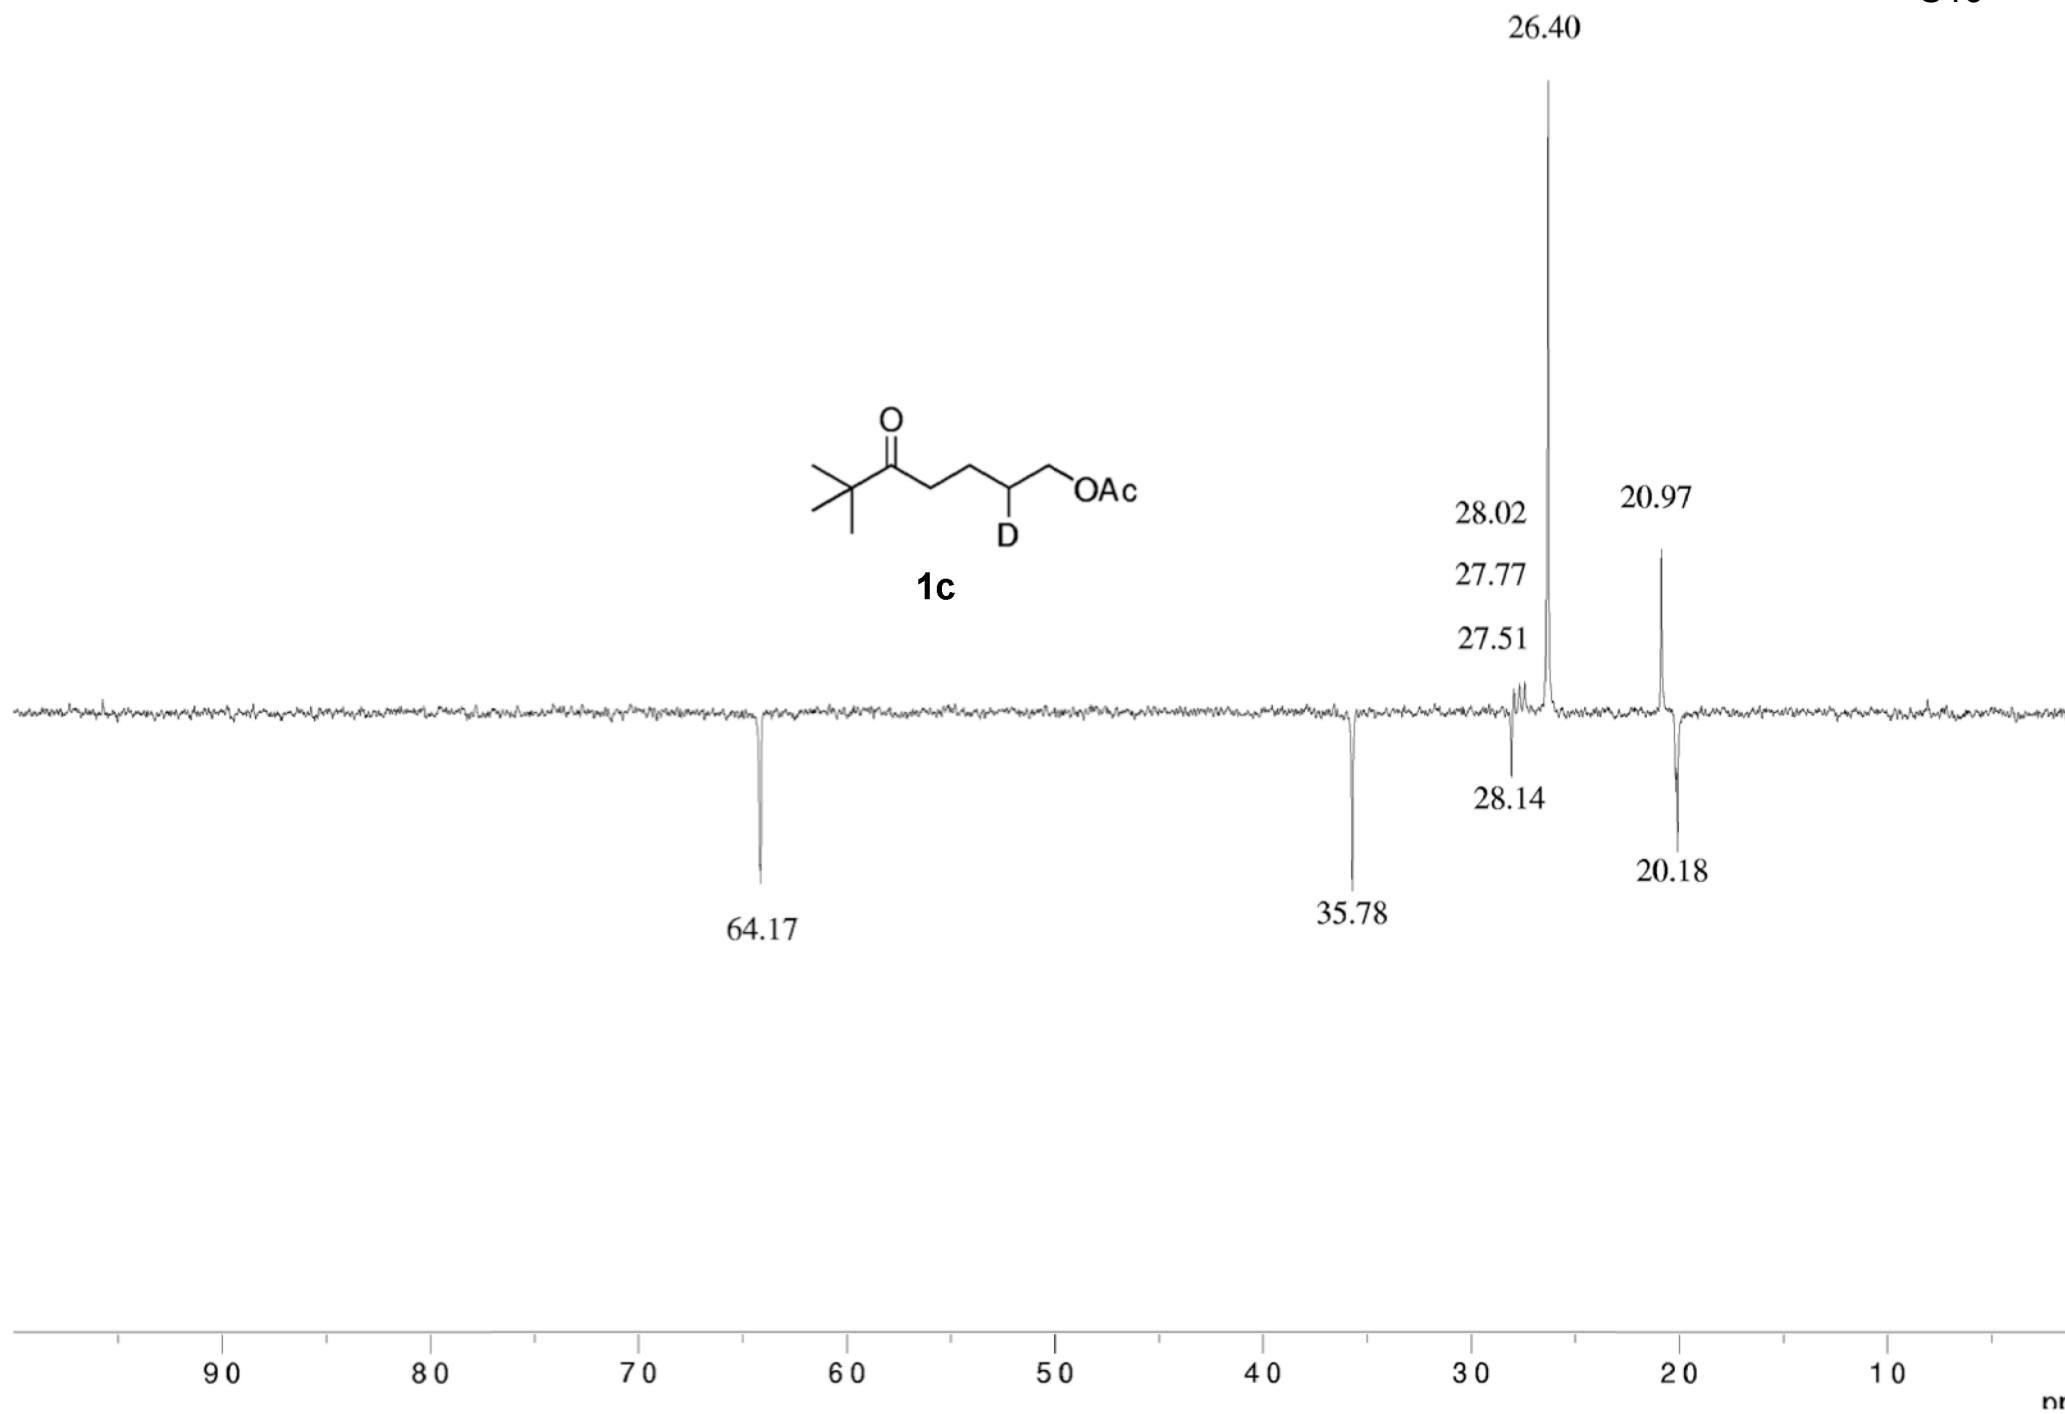

t437f6.hmqc  
21/09/05

S20

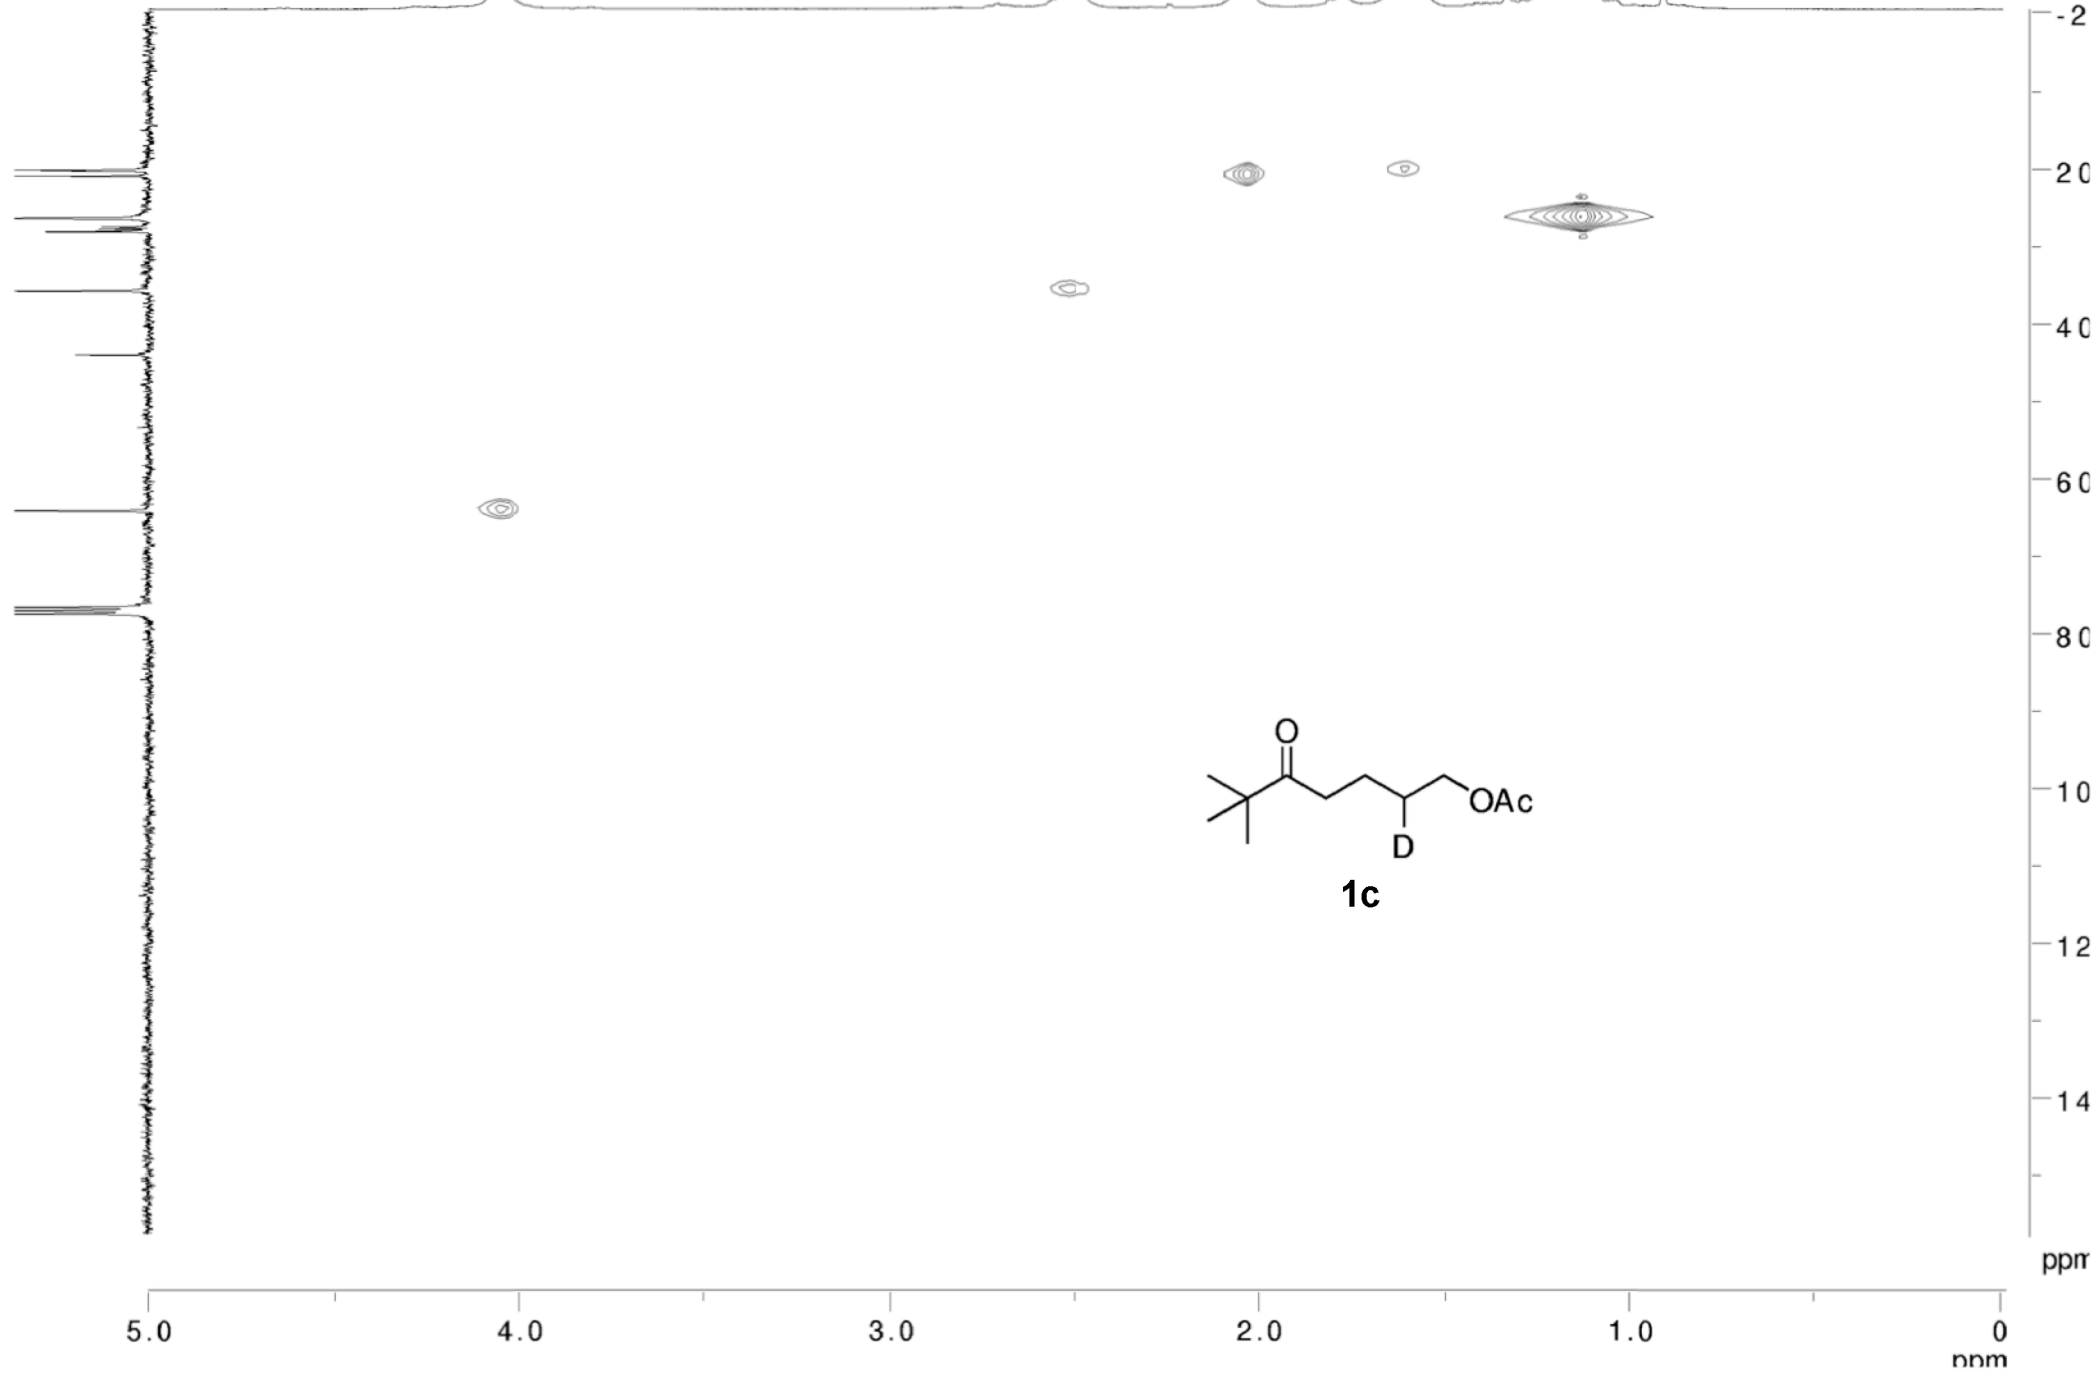

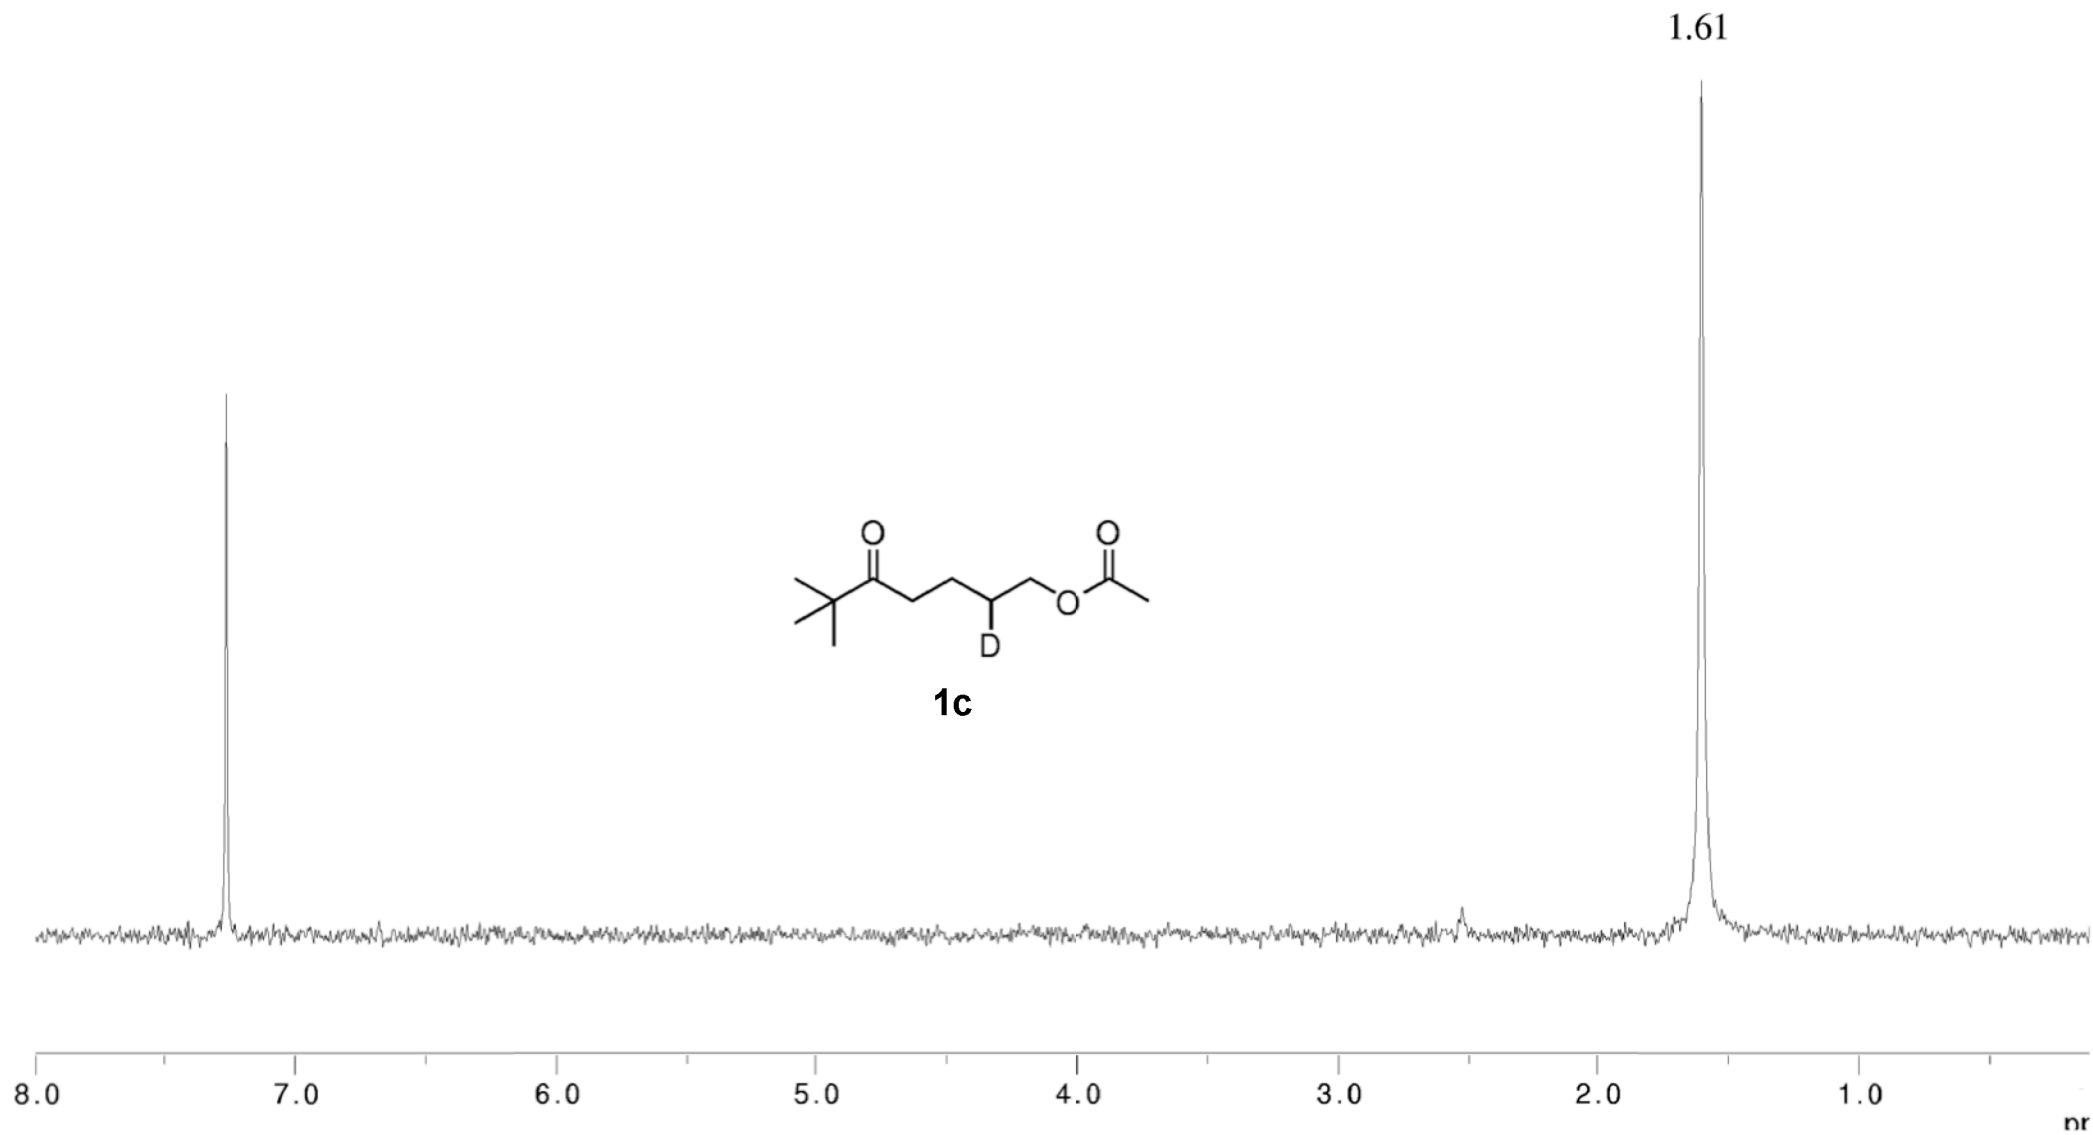

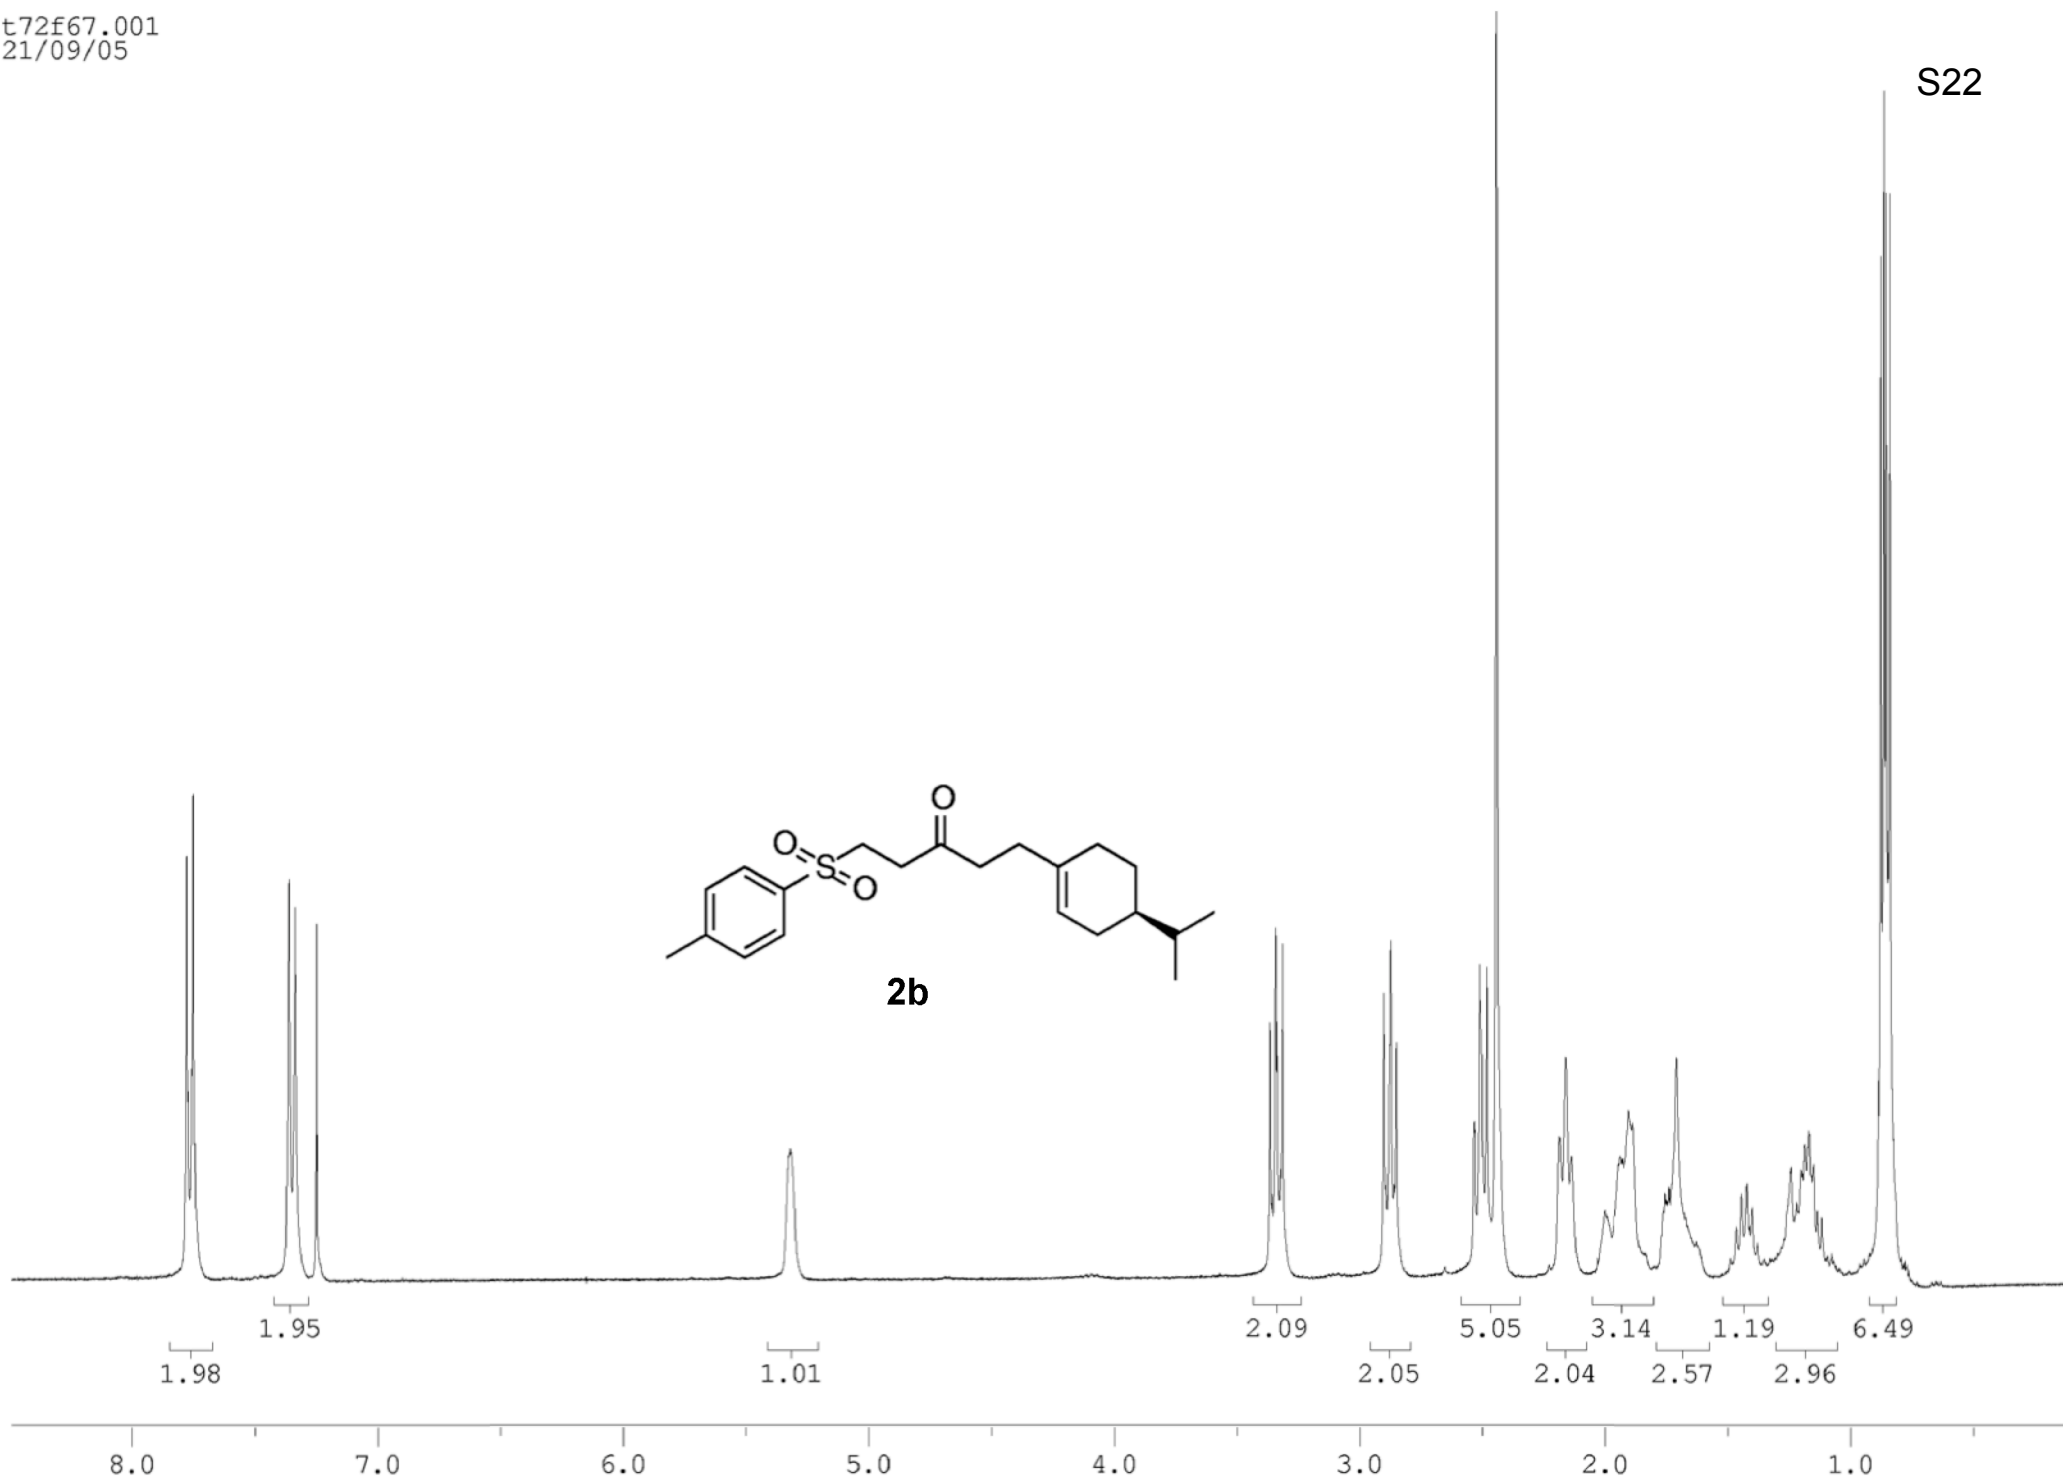



130.00

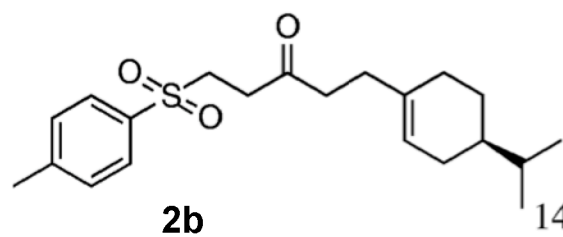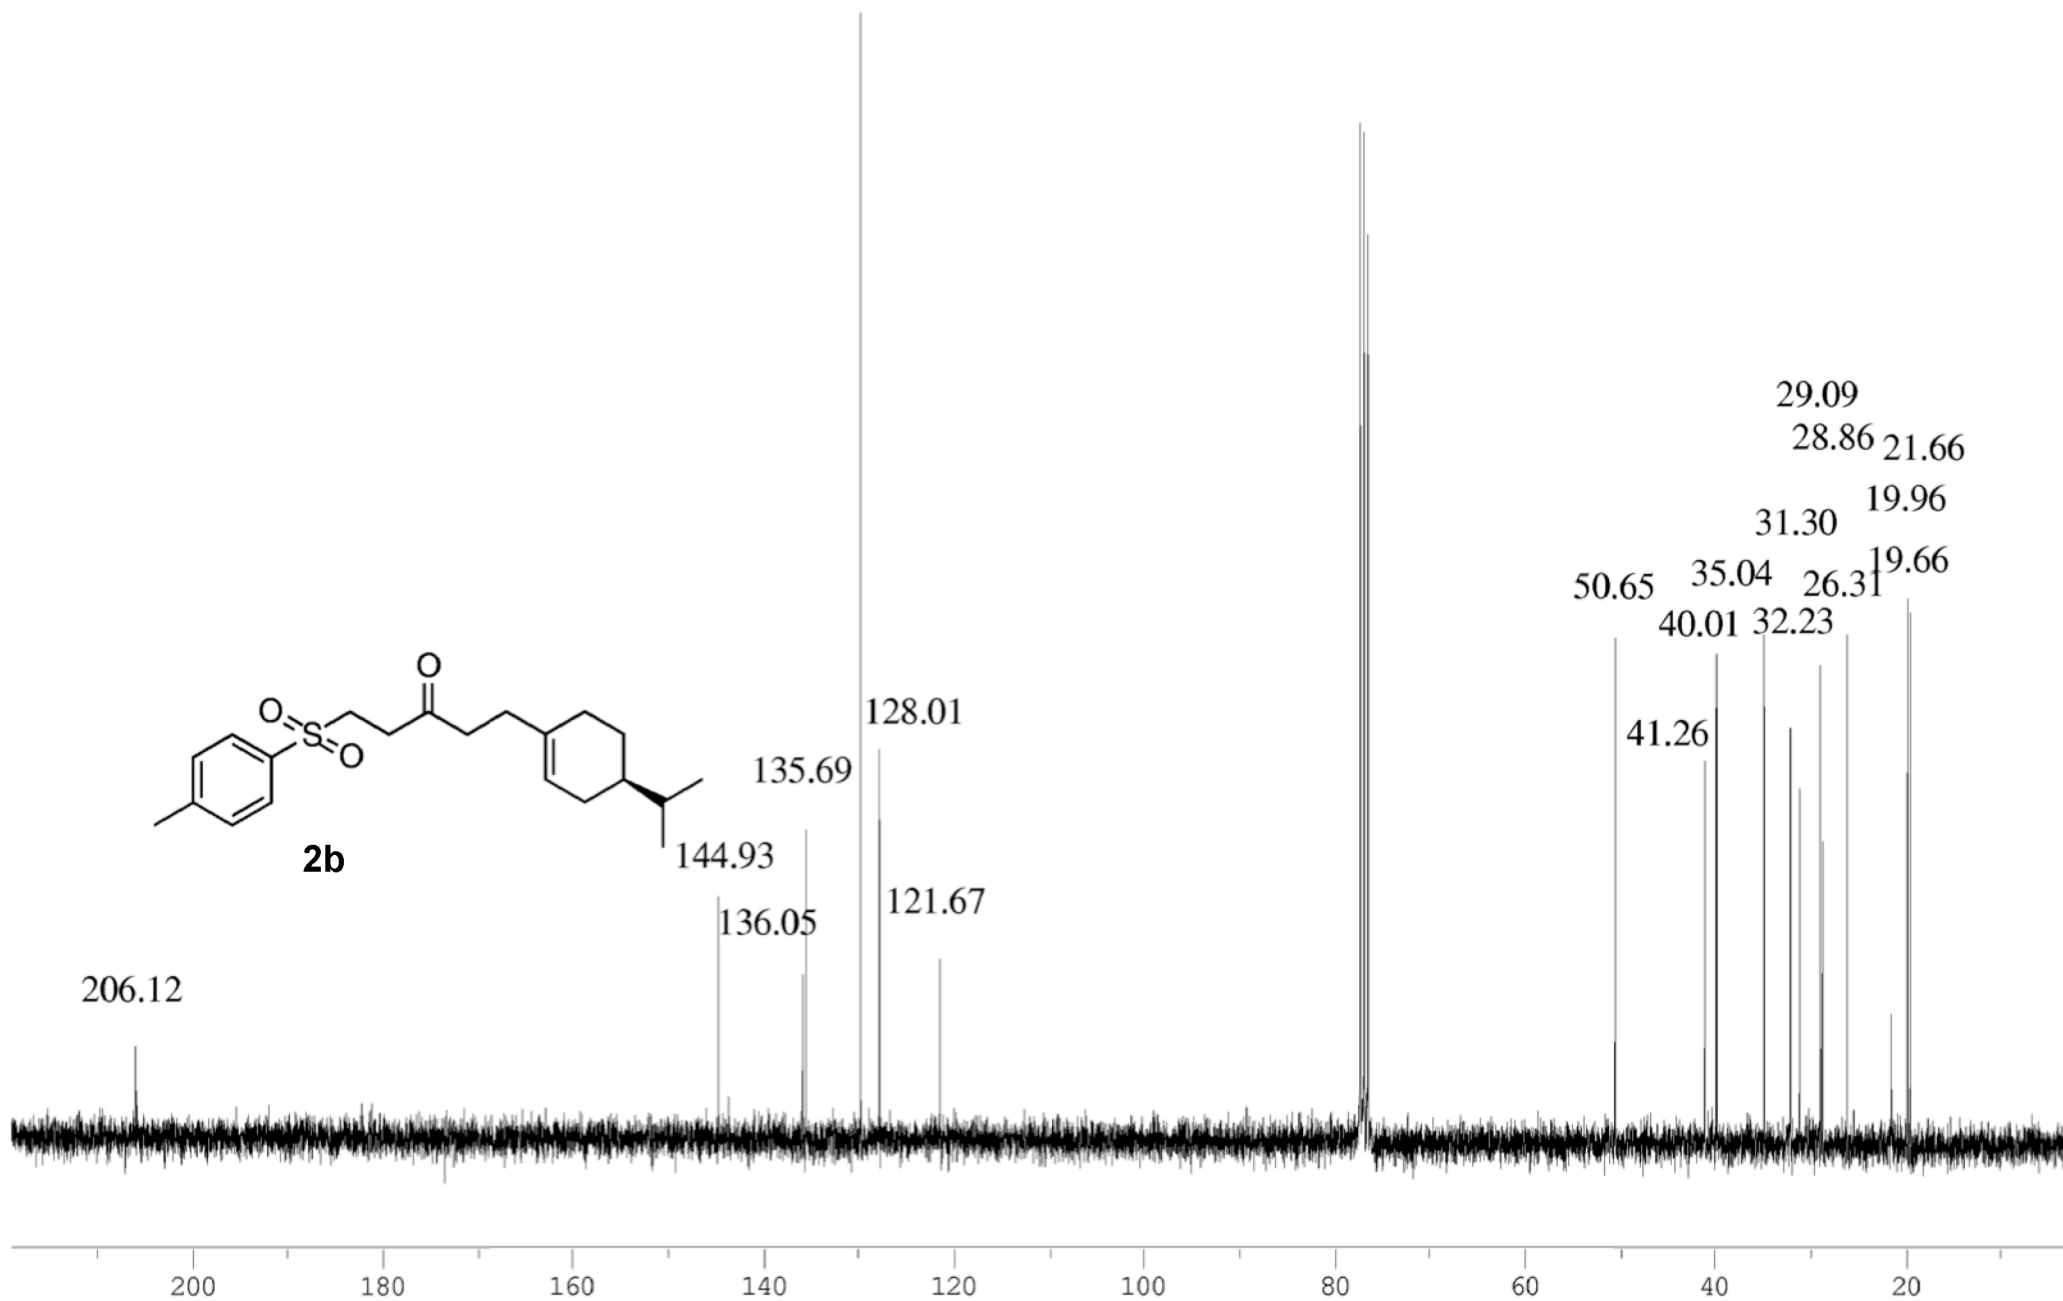

206.12

135.69

144.93

136.05

128.01

121.67

29.09  
28.86 21.66  
31.30 19.96  
50.65 35.04 26.31 19.66  
40.01 32.23

41.26

130.00

S24

128.00

121.66

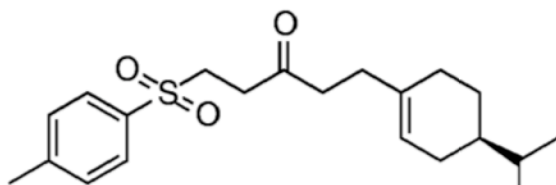

2b

21.67

19.96

40.01

19.67

32.23

29.08

28.85

31.29

50.64

41.25

35.02

26.30

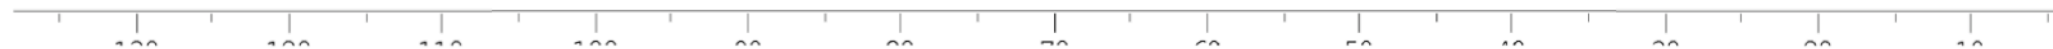

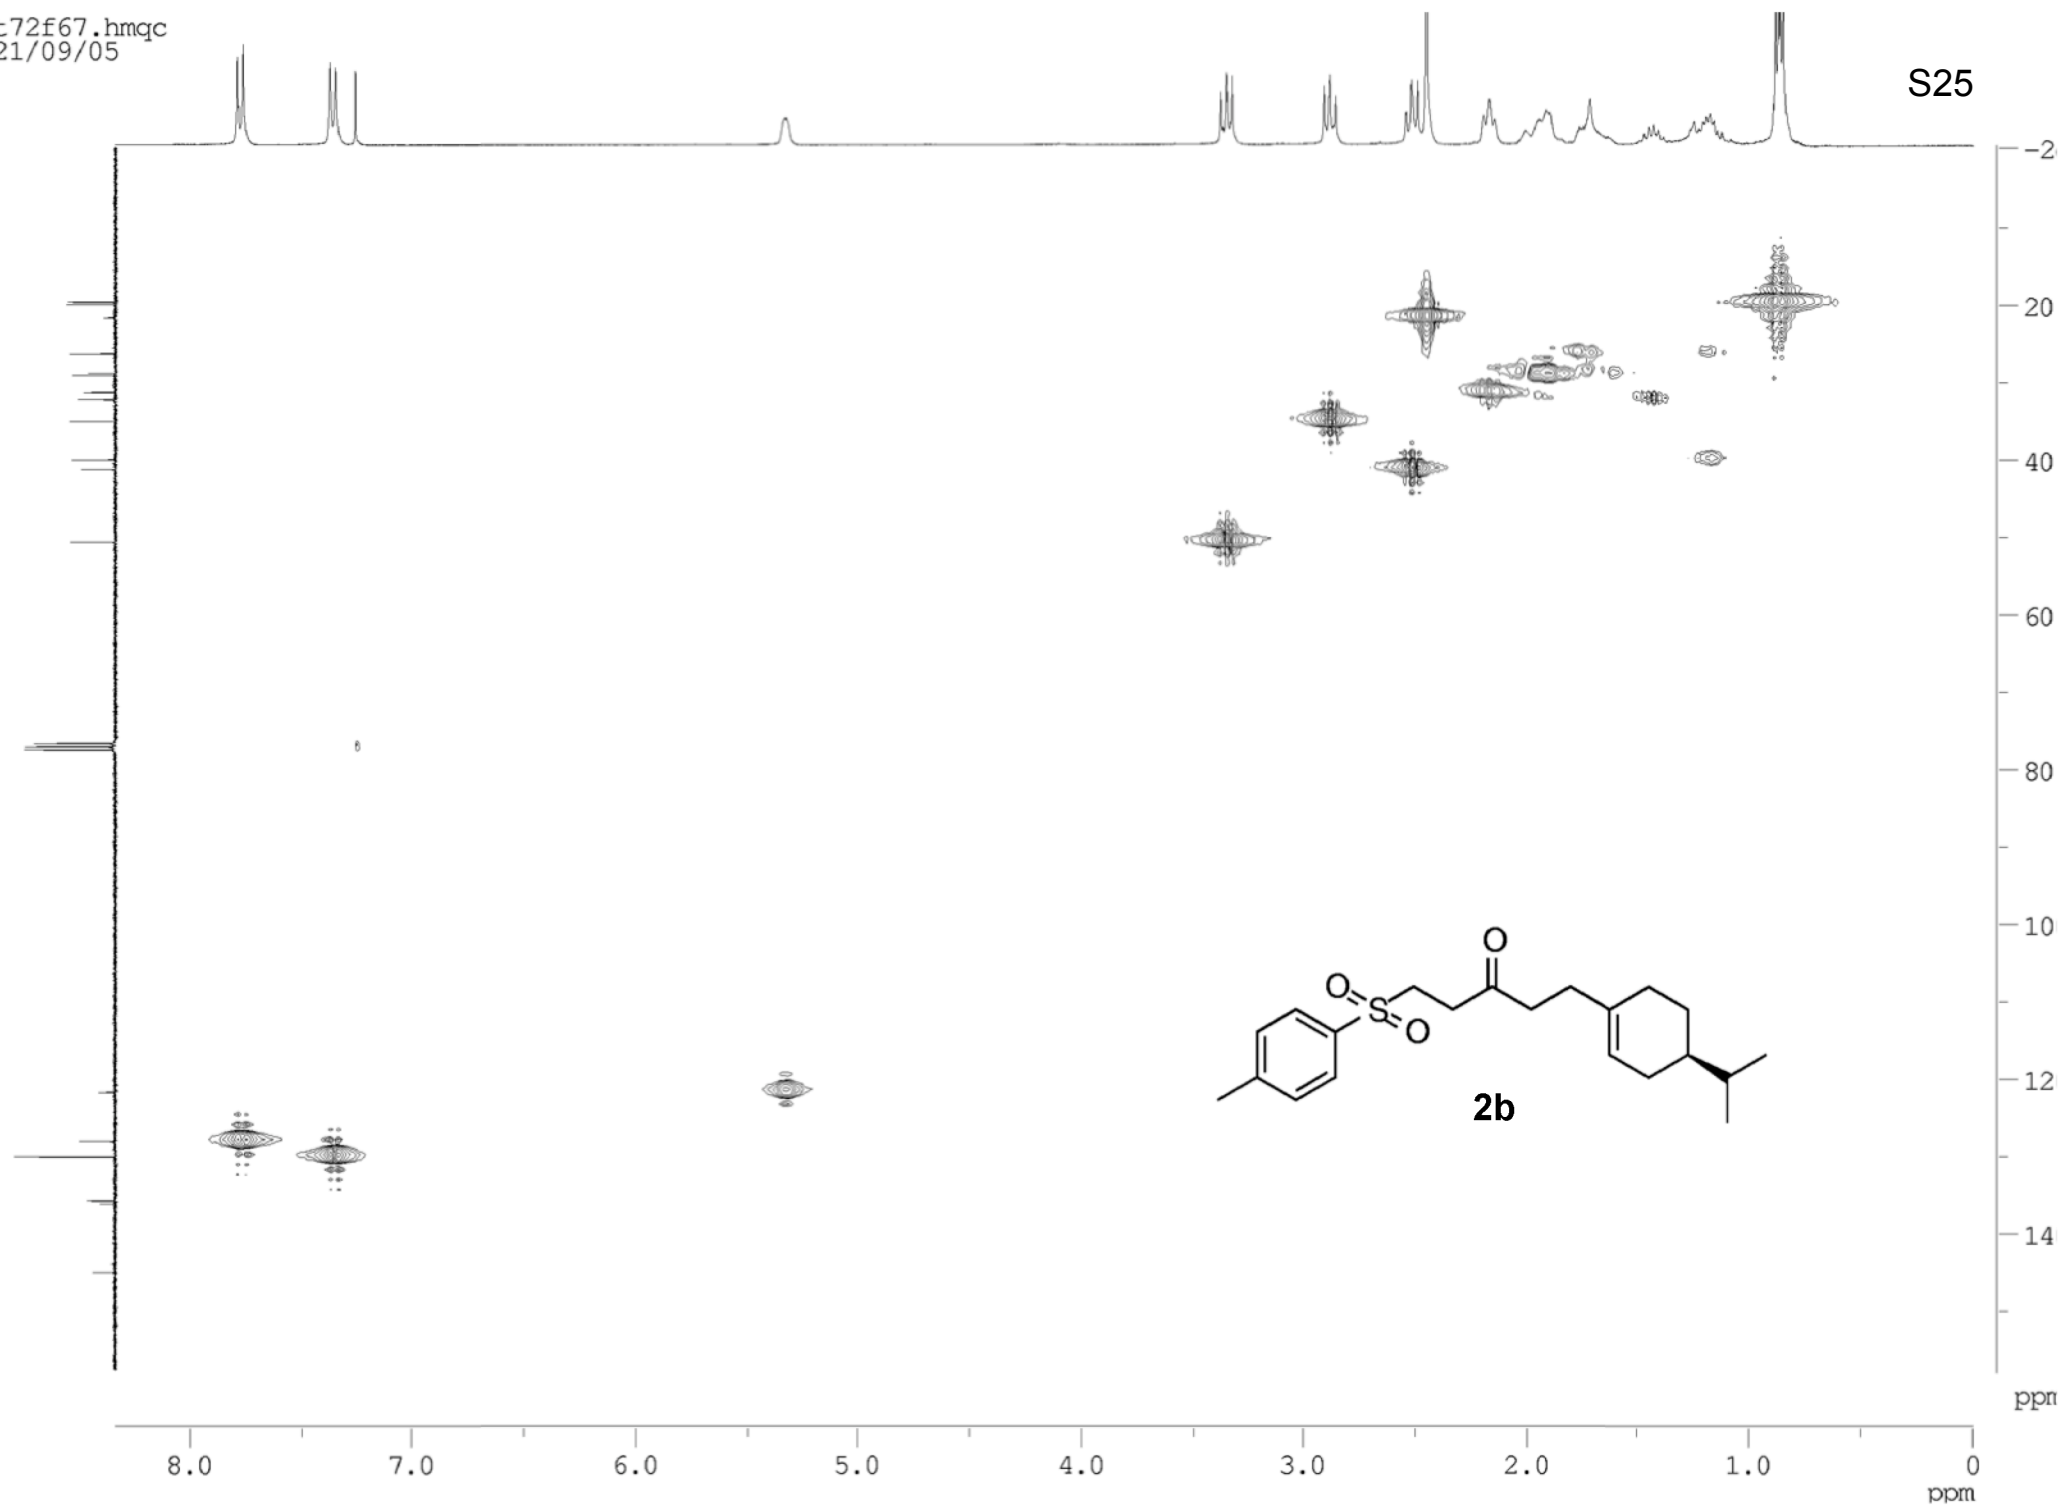

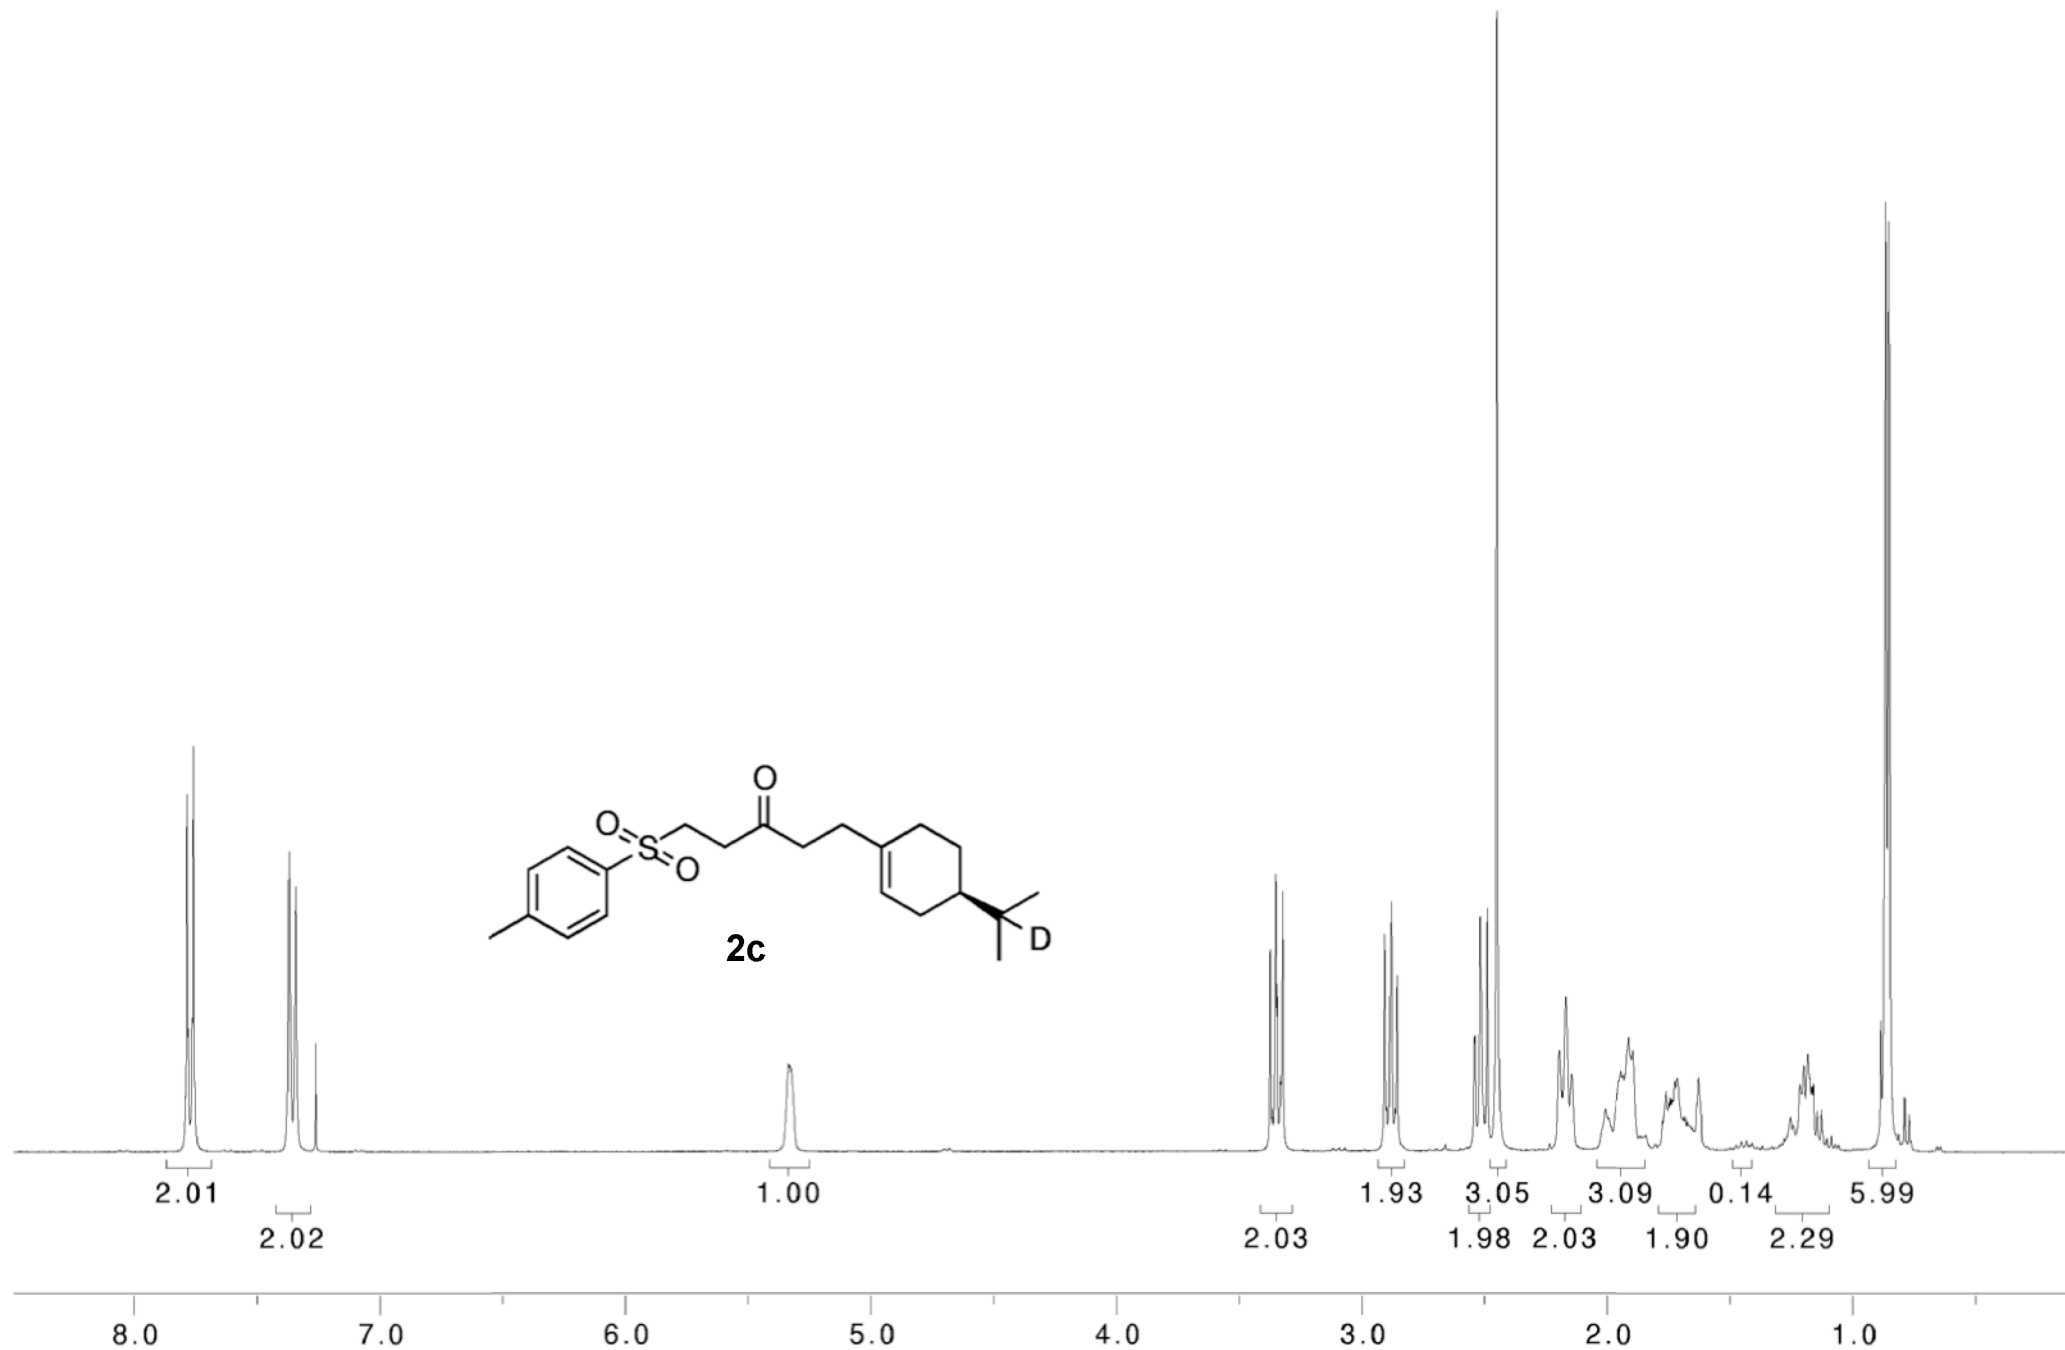

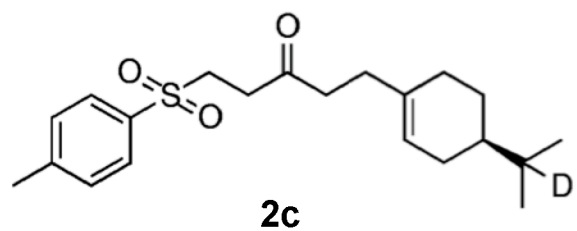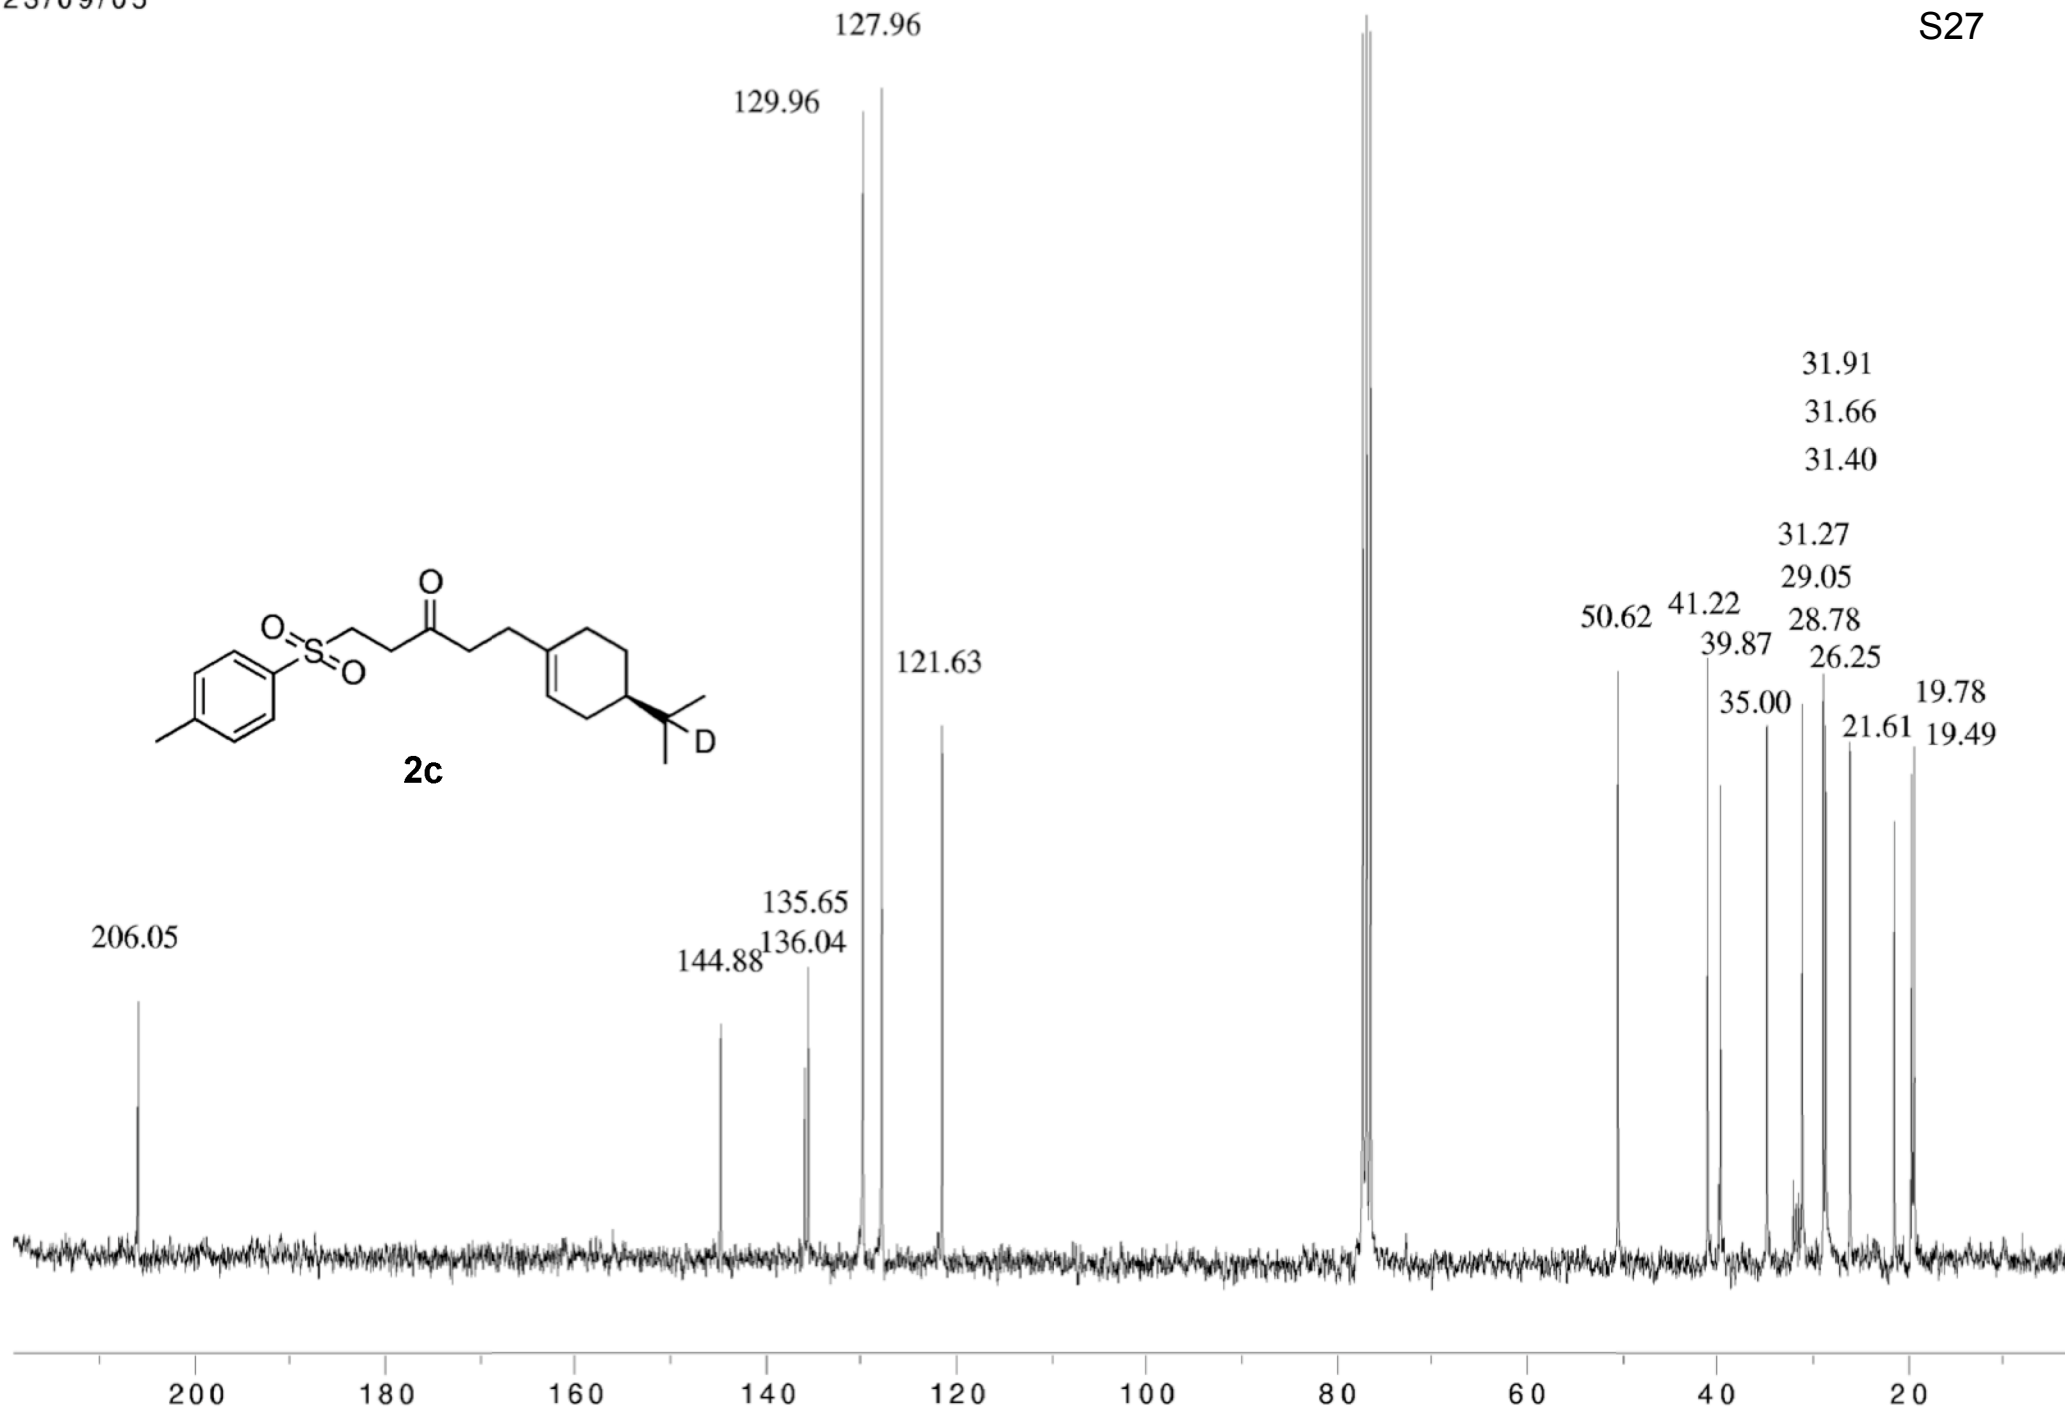

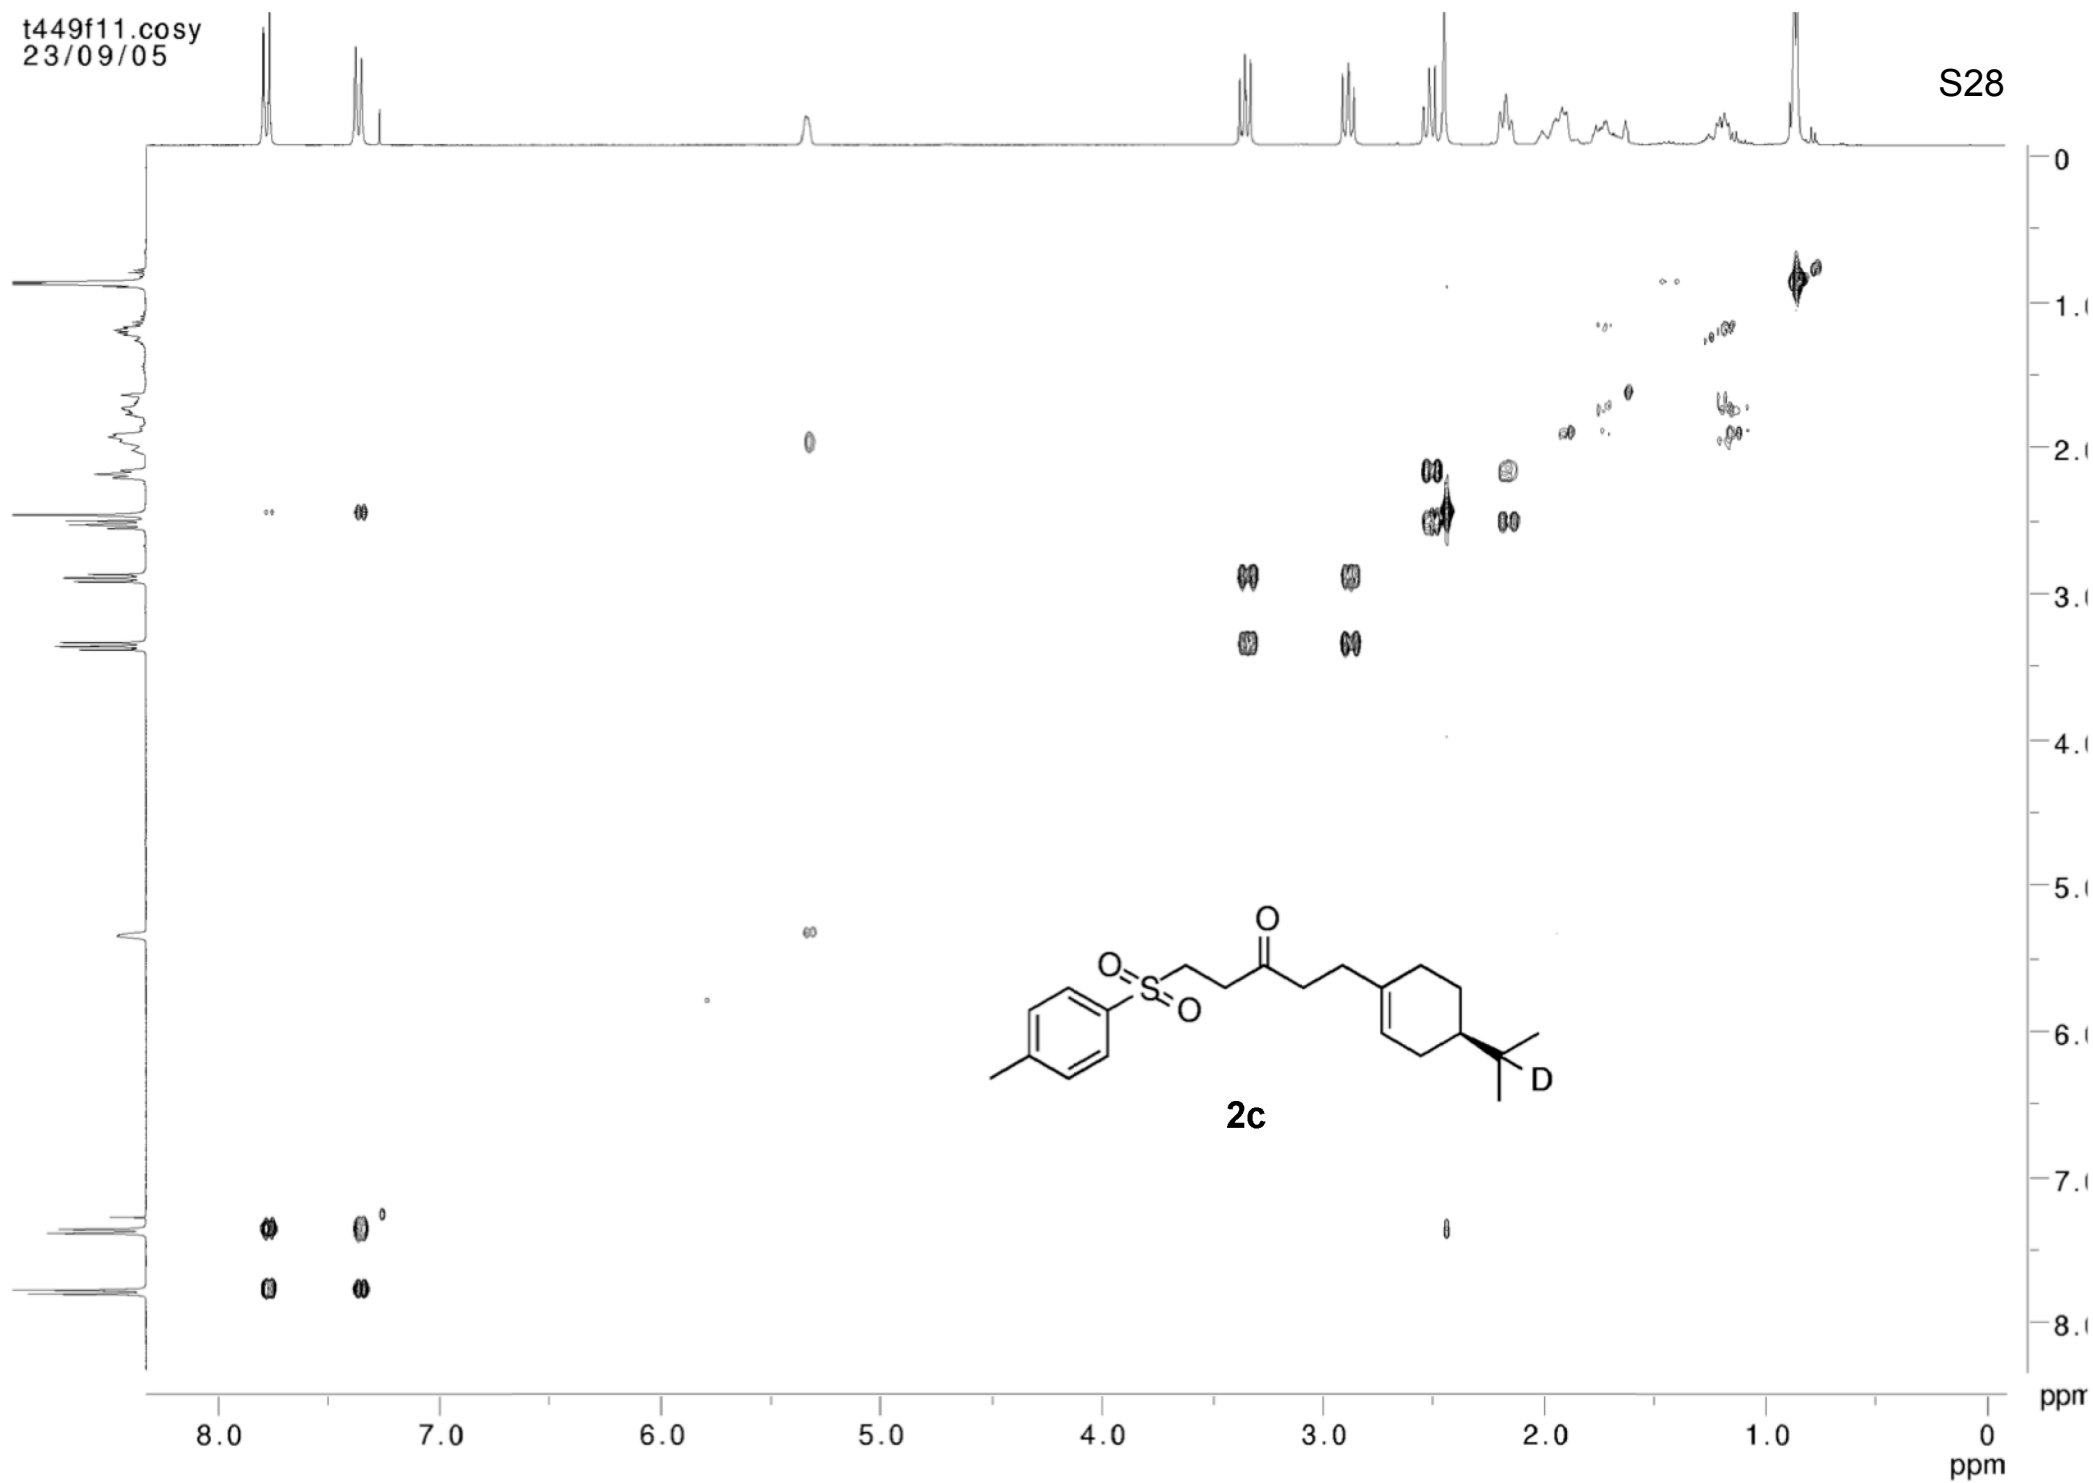

130.00

128.01

121.67

21.66

19.83

19.53

39.92

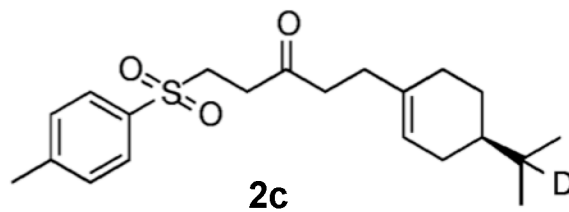

2c

50.66

41.26

31.31

35.05

29.09

26.29

28.82

200

180

160

140

120

100

80

60

40

20

t449f11.hmqc  
23/09/05

S30

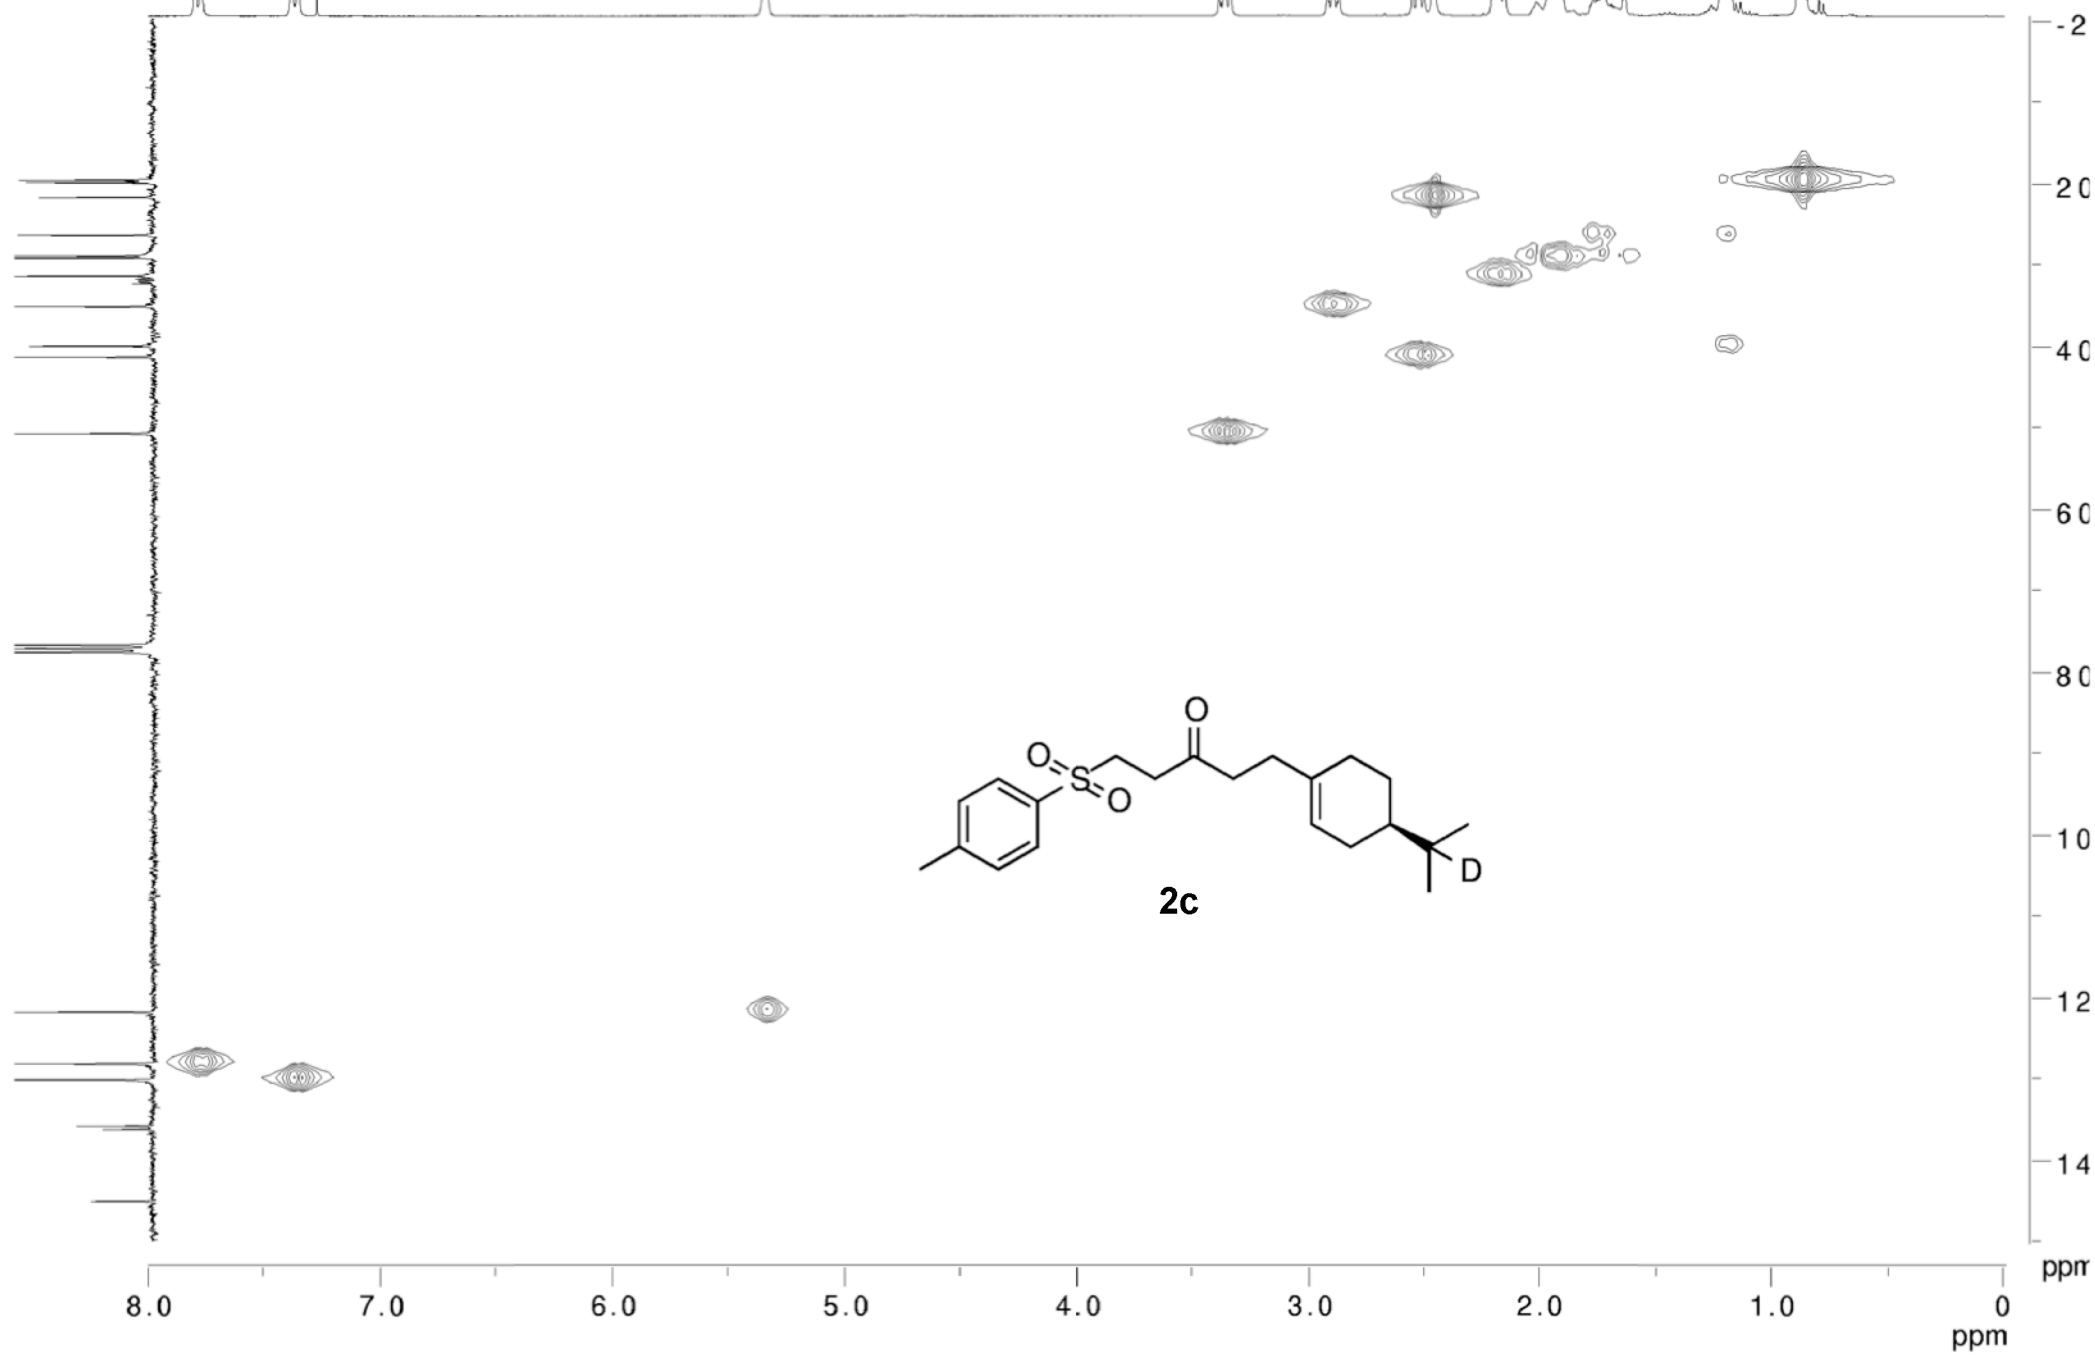



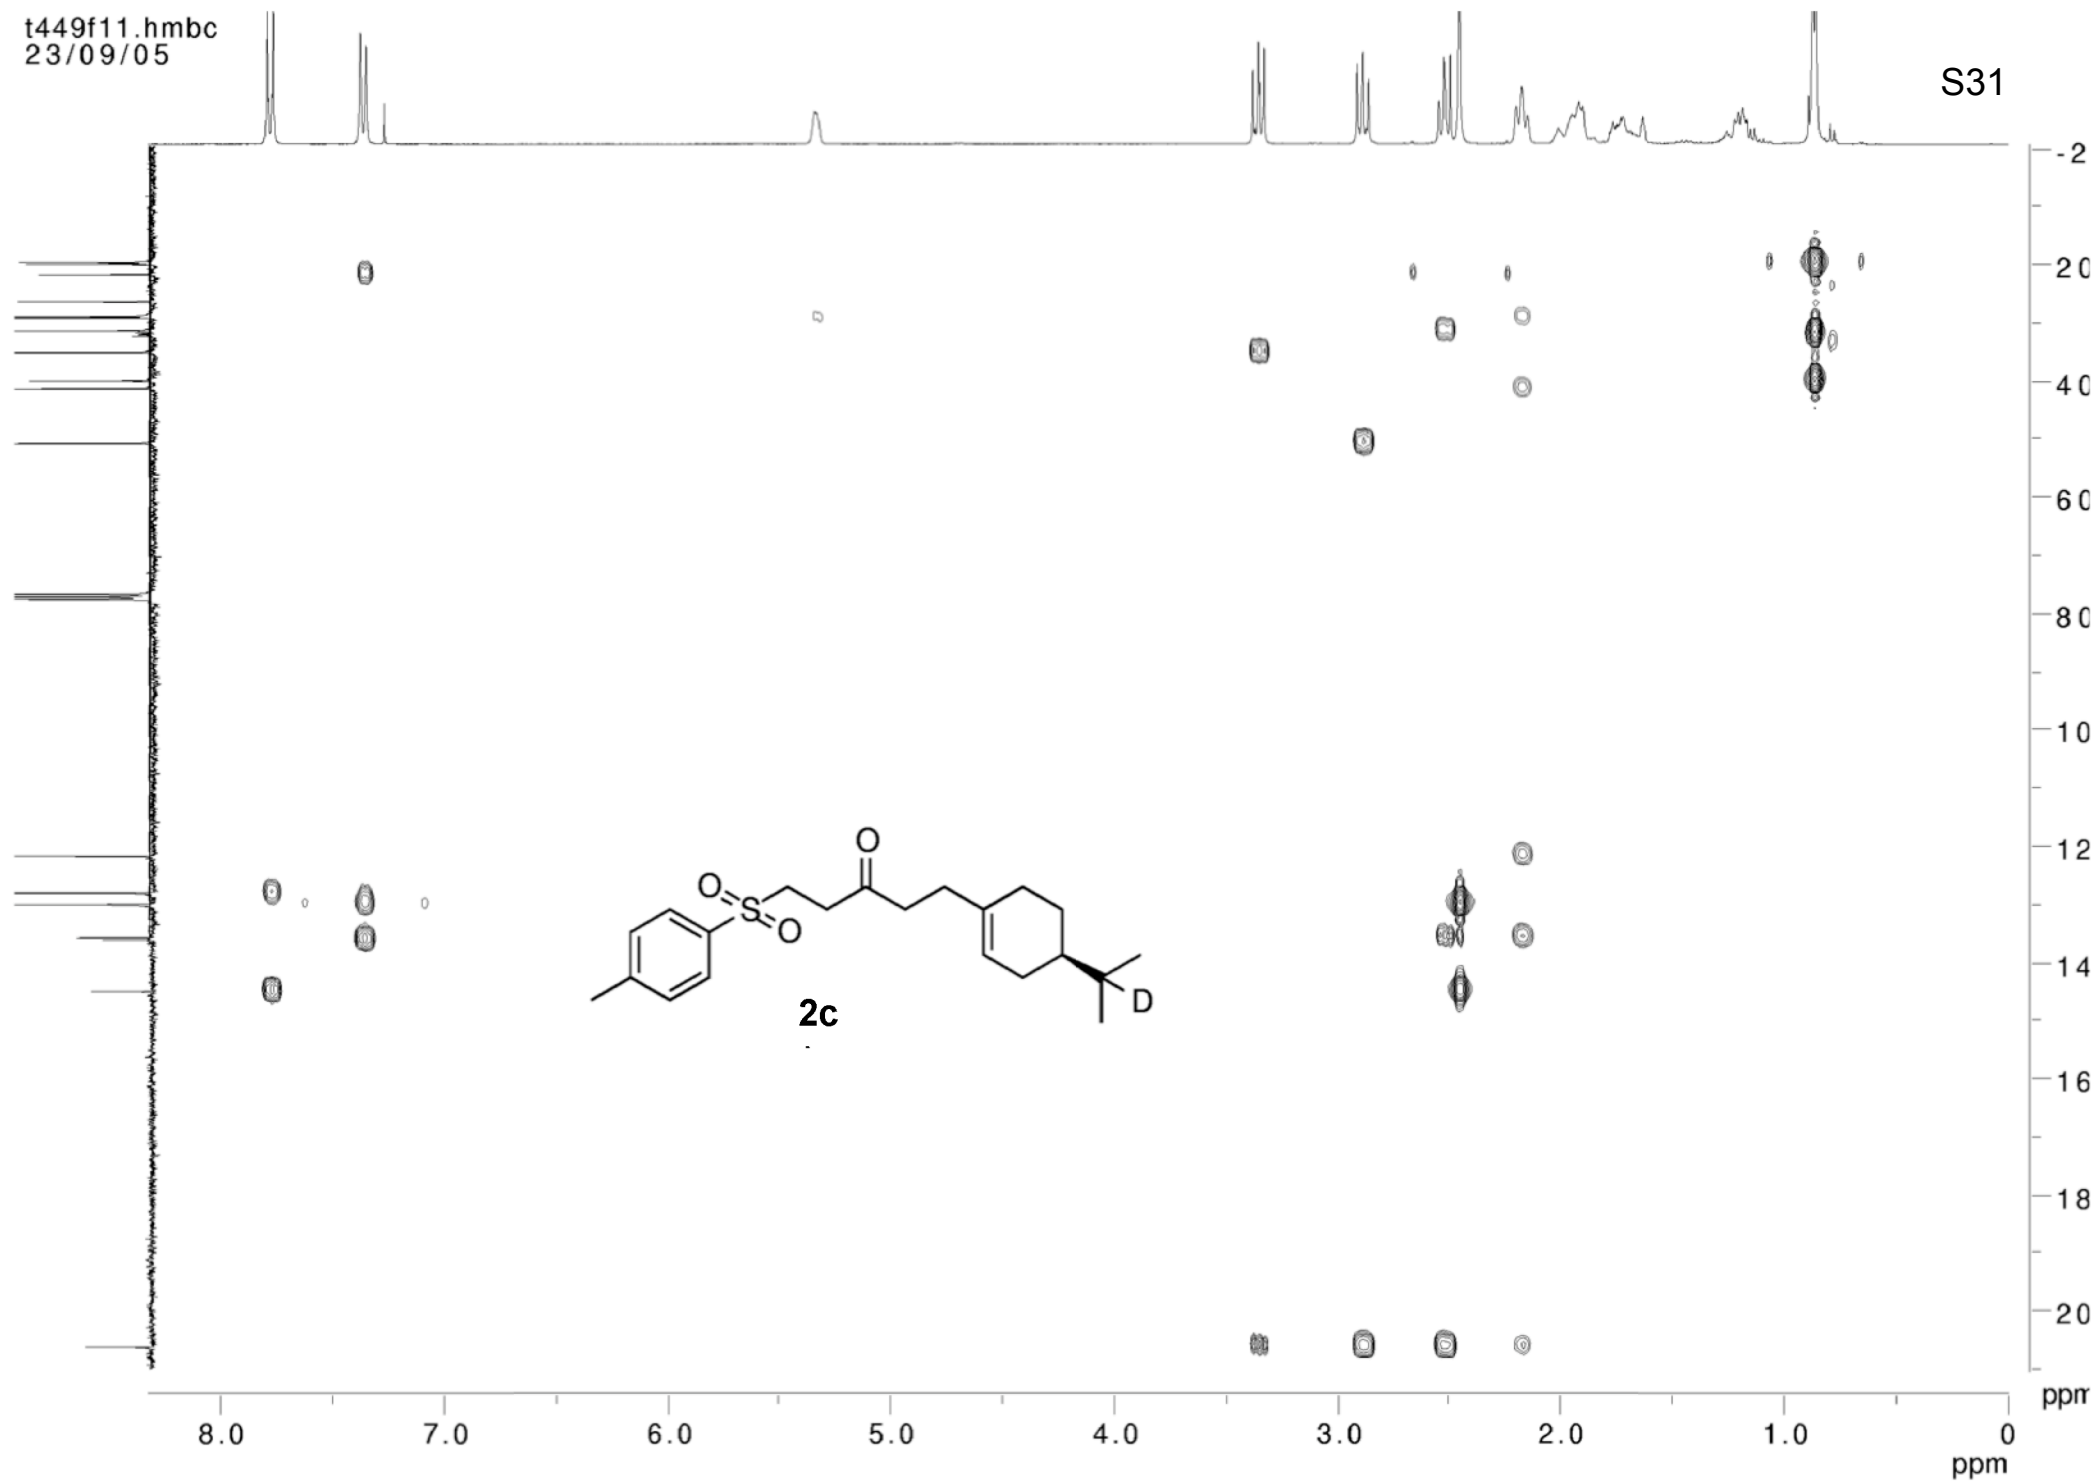

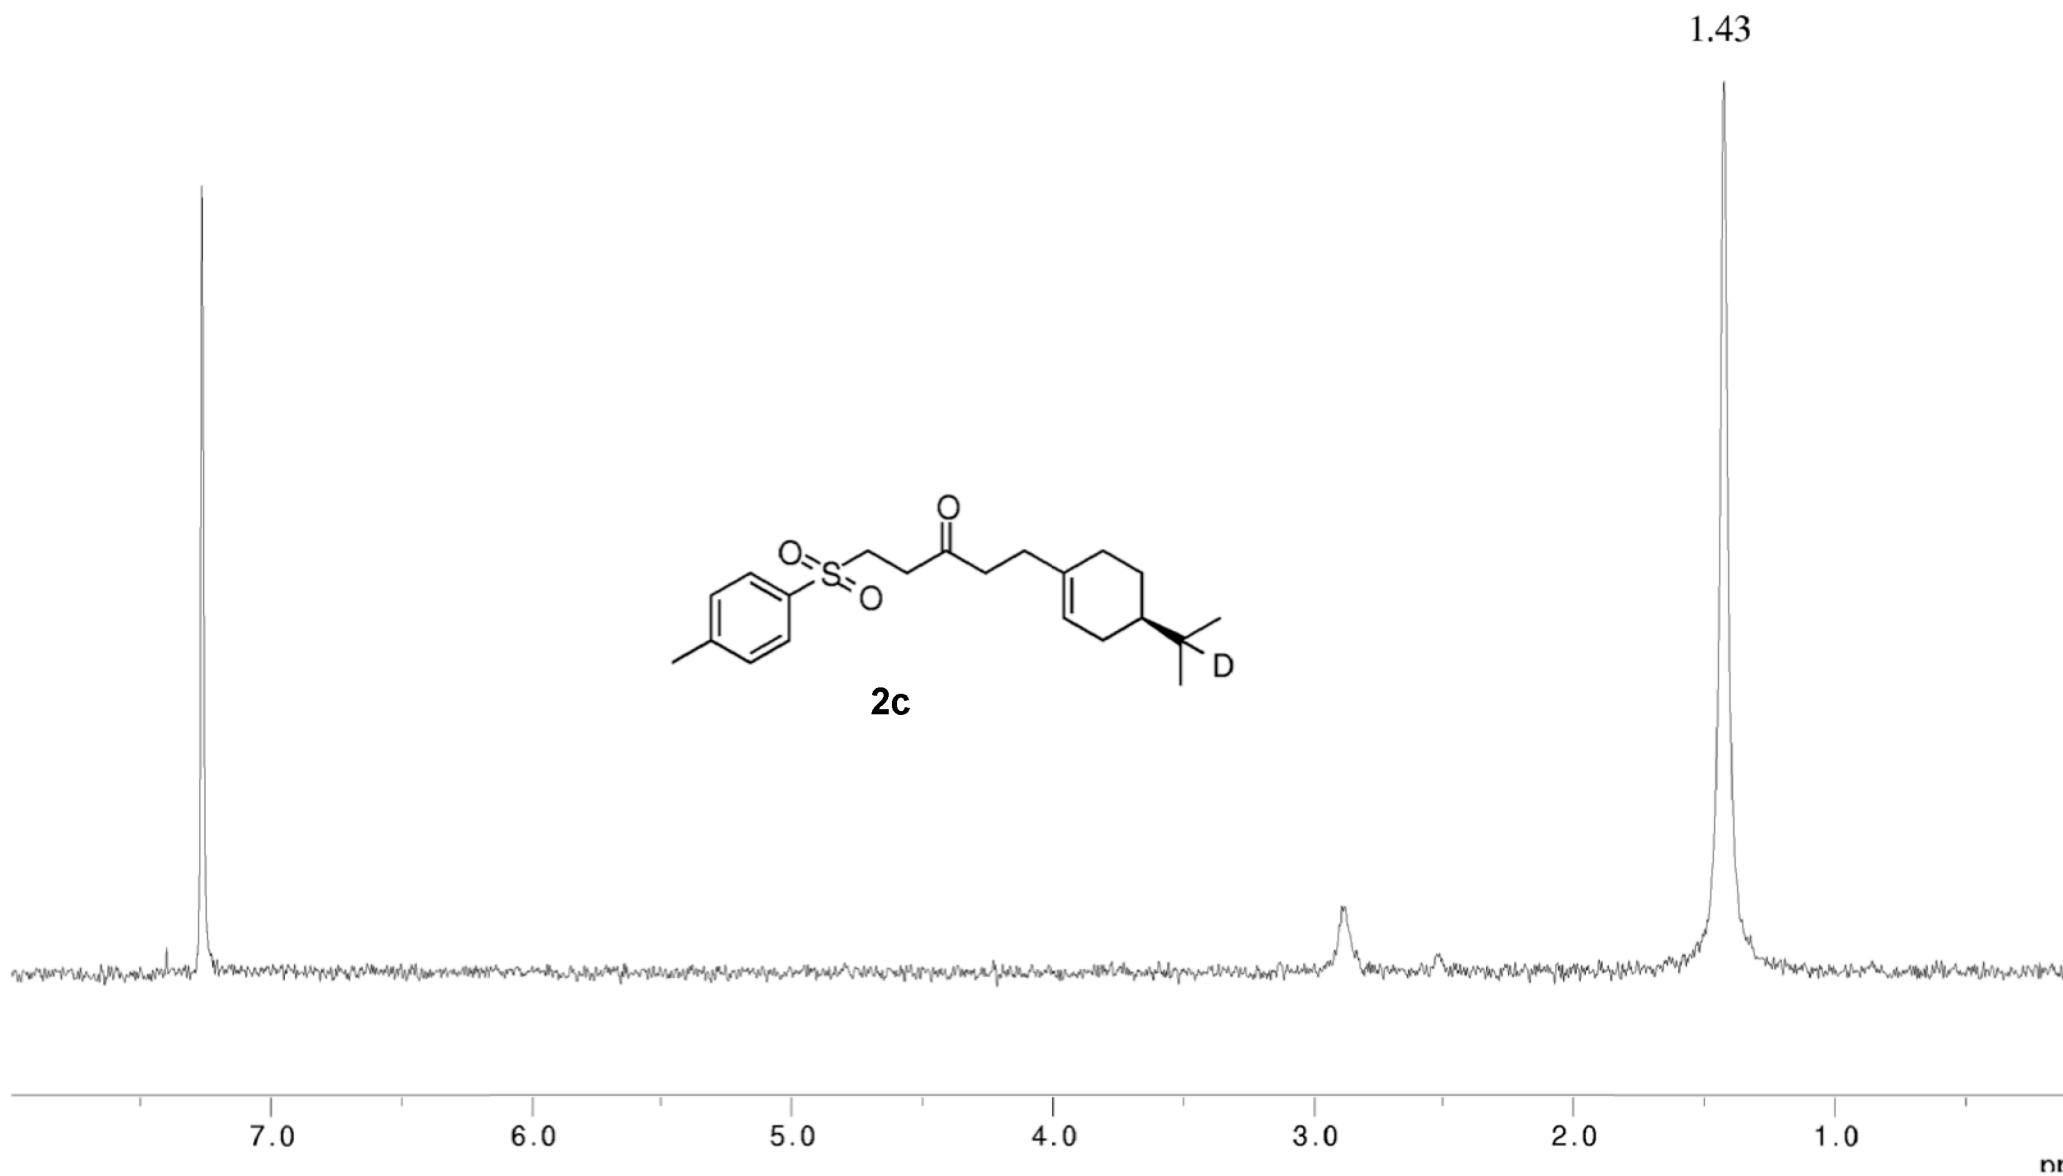

22FAL70 1 (1D 1H) CDCl3 300MHz

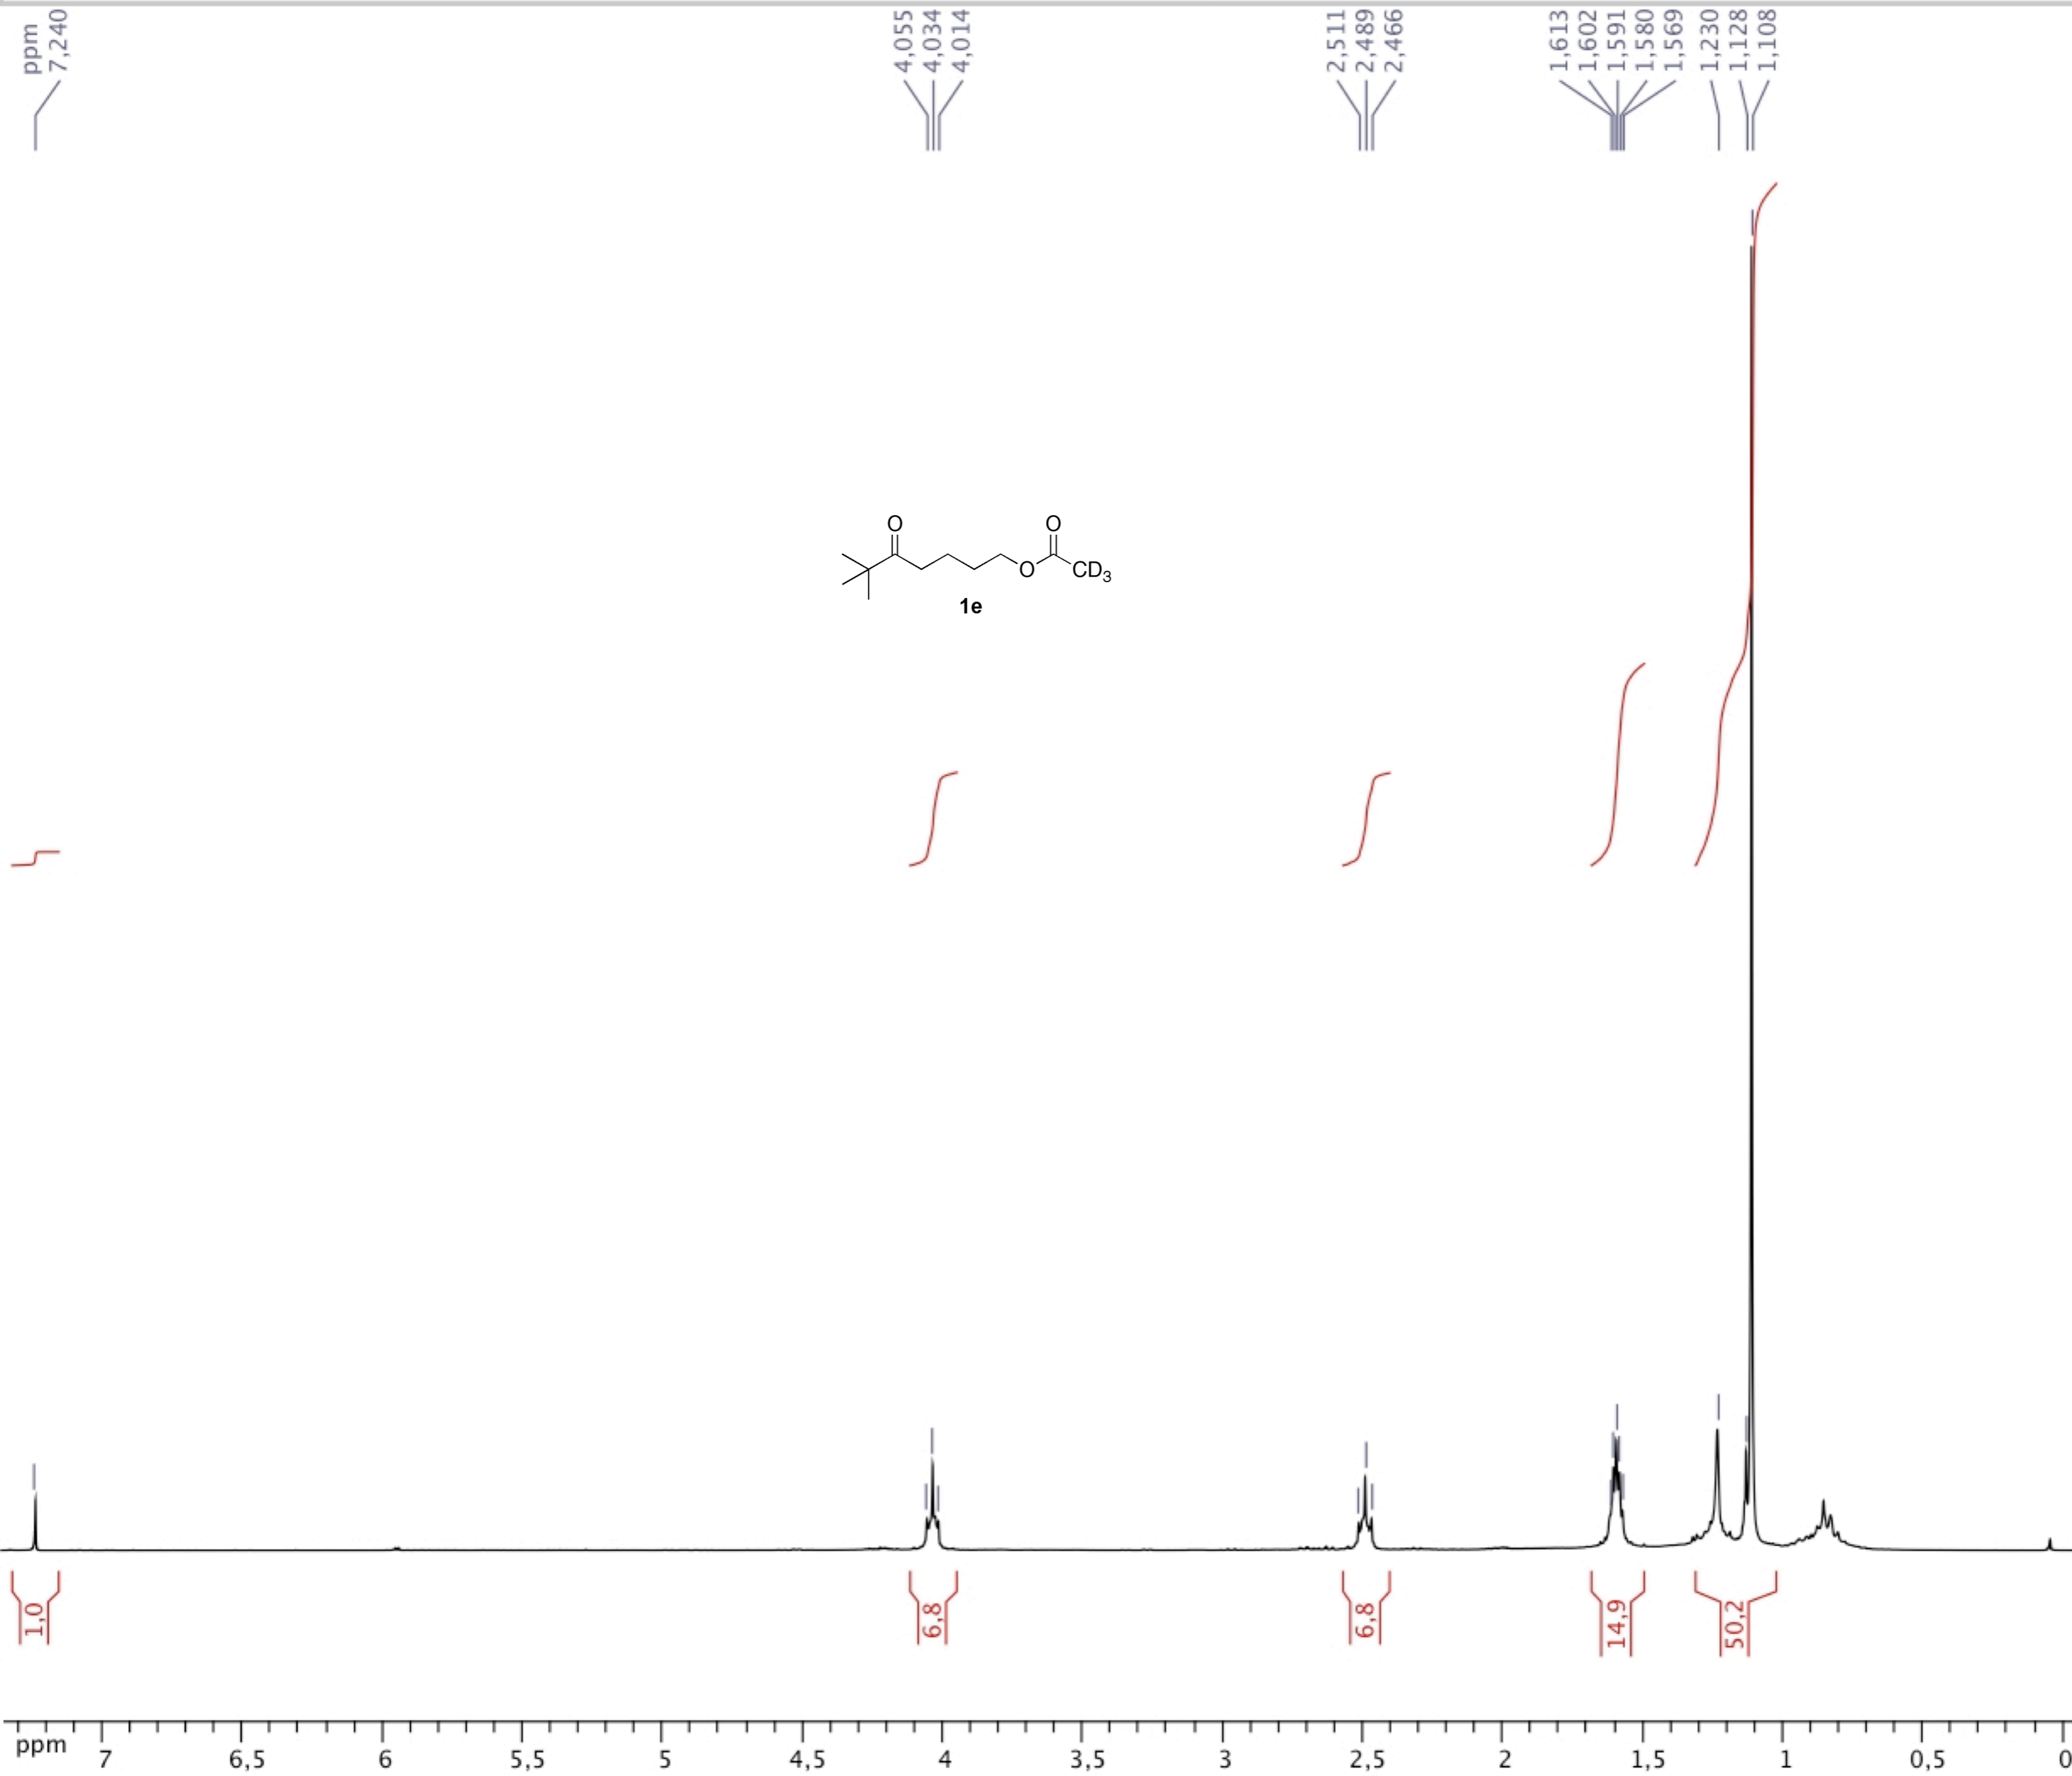

Parameters S33

22FAL70 1 (1D 1H)

F1 :

- Size : 65536 points complex
- Spectral Width : 6172.8394 Hz
- Carrier Frequency : 300.17184 MHz
- Nucleus : 1H

Type : 1D

Spectro : BRUKER 300 MHz

Probe : 5 mm QNP 1H/13C/31P/19F Z-GR

Date : Wed Apr 04 19:56:42 CEST 2007

Temperature : 300.0 K

Solvent : CDCl3

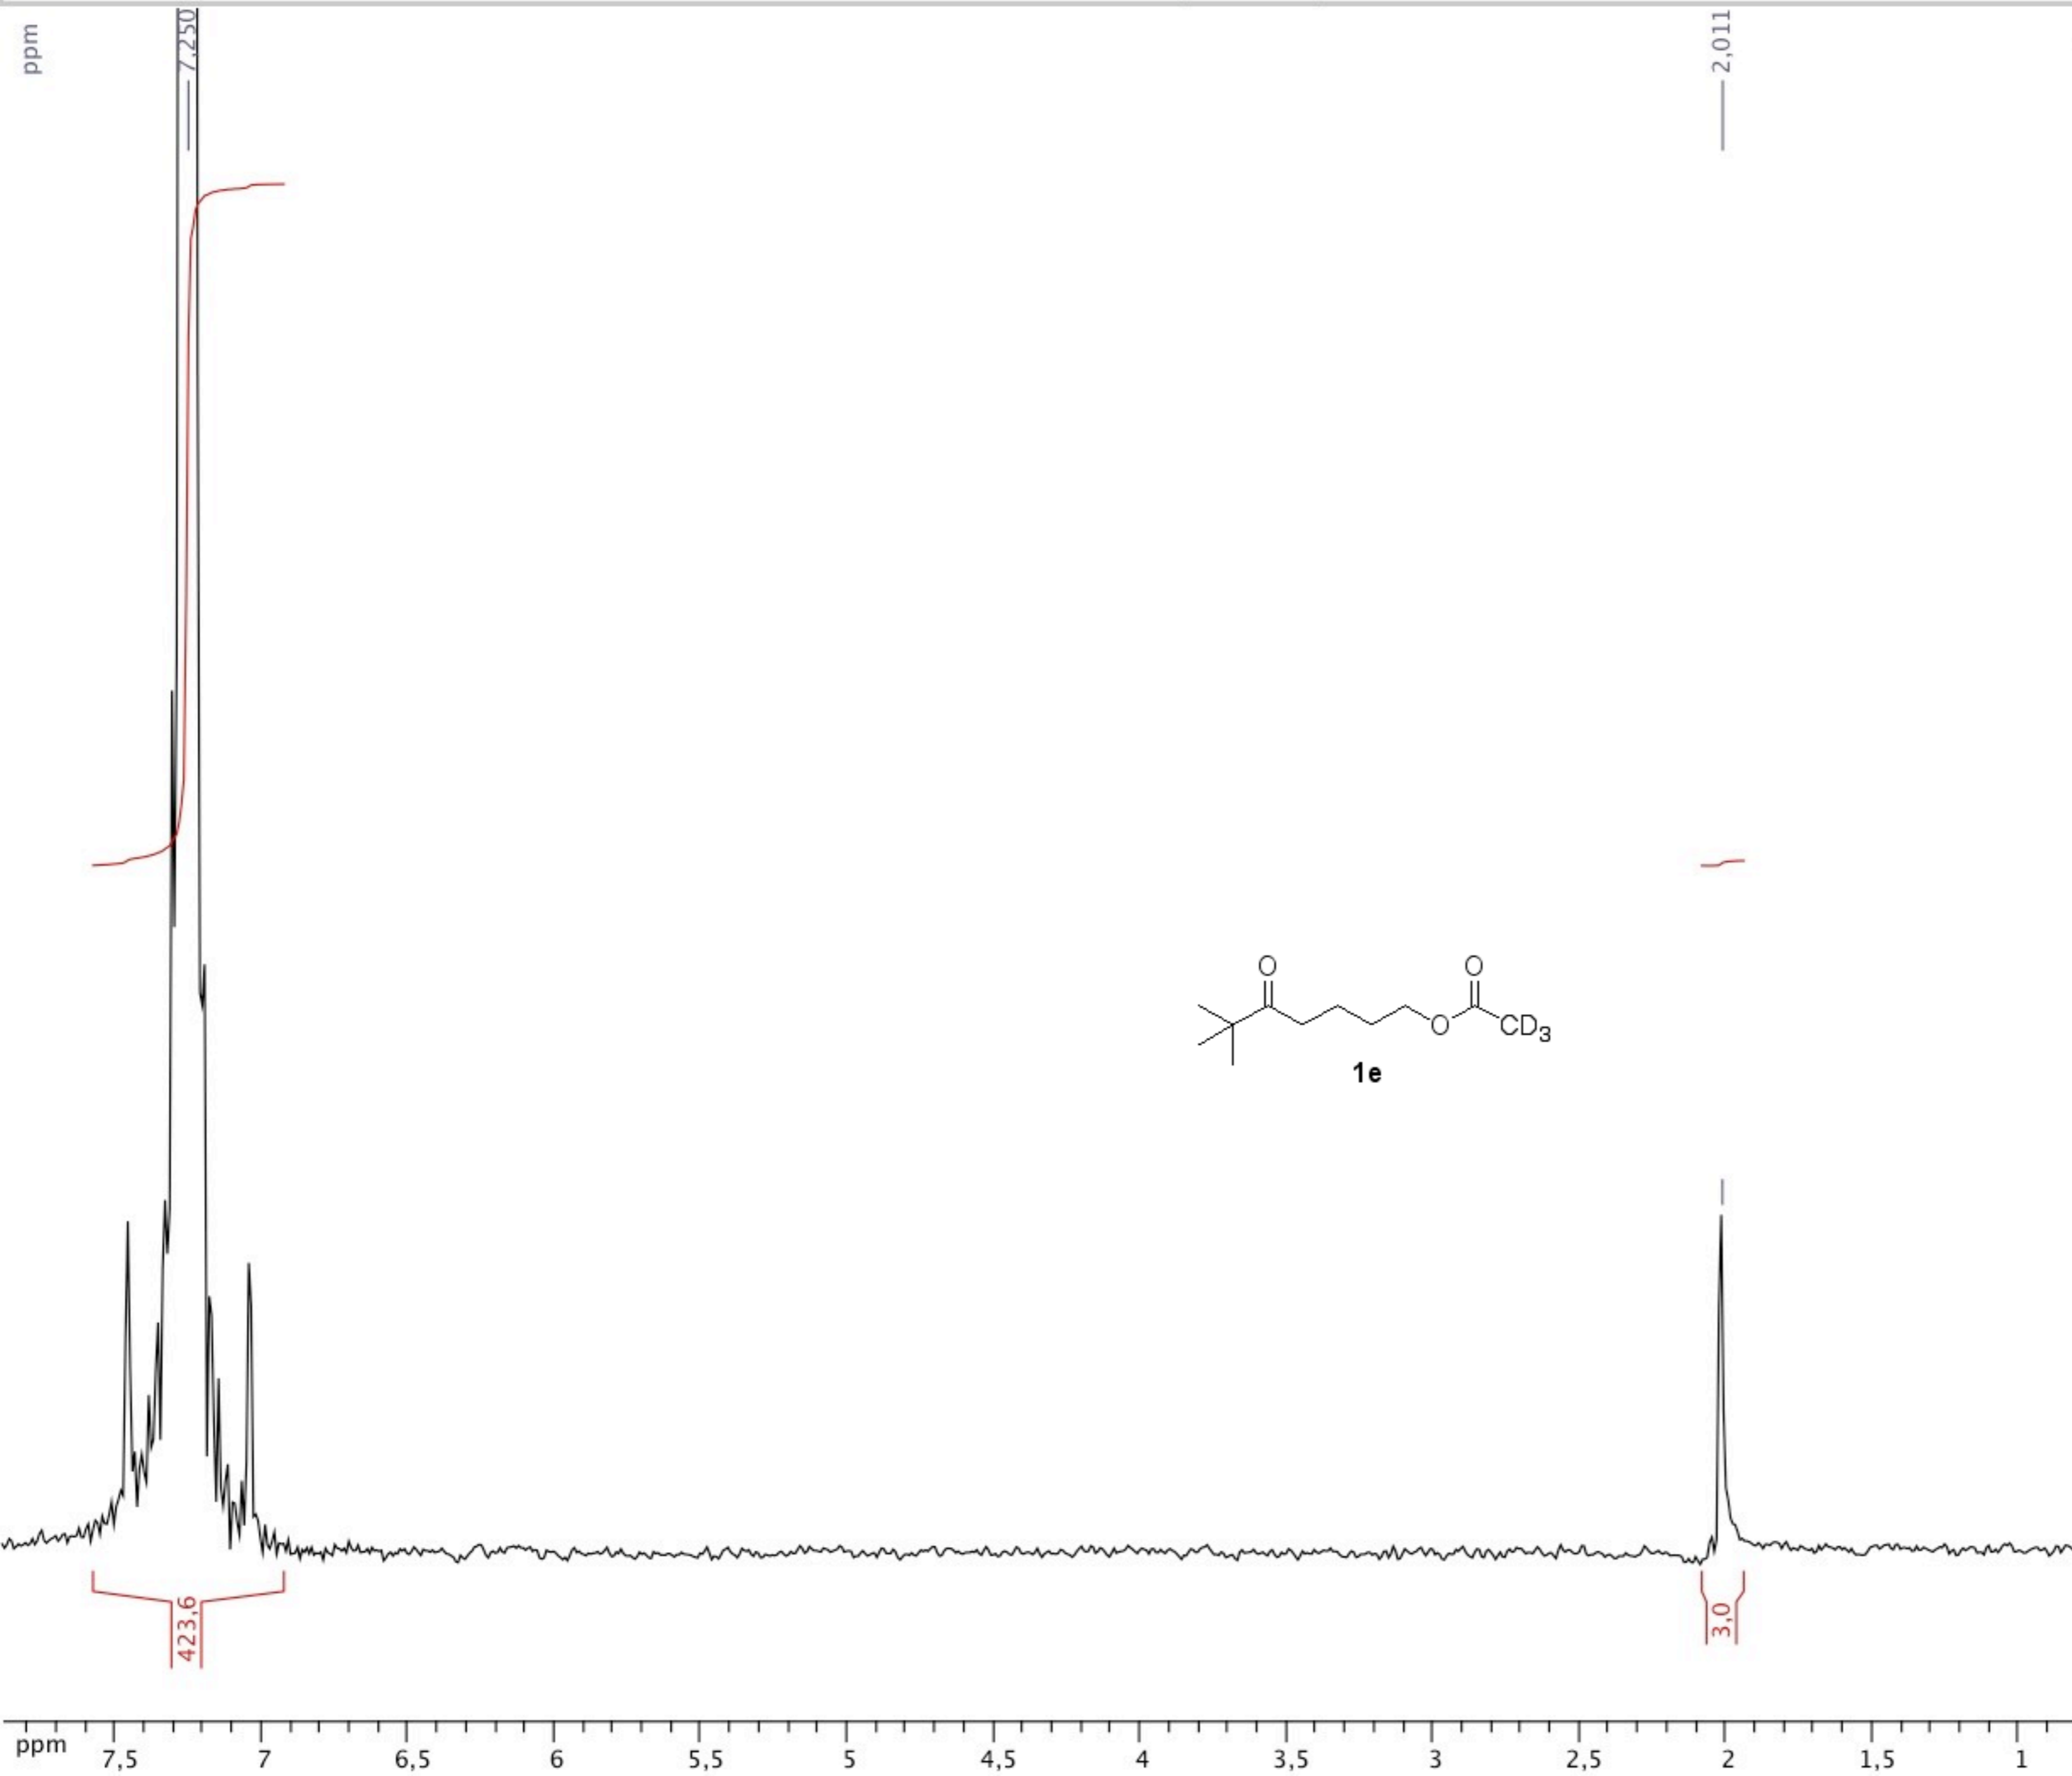

22FAL70 3 (1D 2H)

F1 :

- Size : 16384 points complex
- Spectral Width : 10000.0 Hz
- Carrier Frequency : 76.78219 MHz
- Nucleus : 2H

Type : 1D

Spectro : BRUKER 26847 MHz

Probe : 5 mm BBI 1H-BB Z-GRD Z810701/

Date : Thu Apr 19 15:45:50 CEST 2007

Temperature : 298.0 K

Solvent : CDCl3

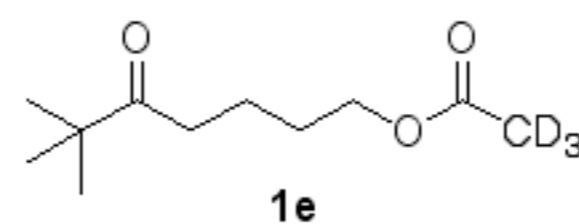

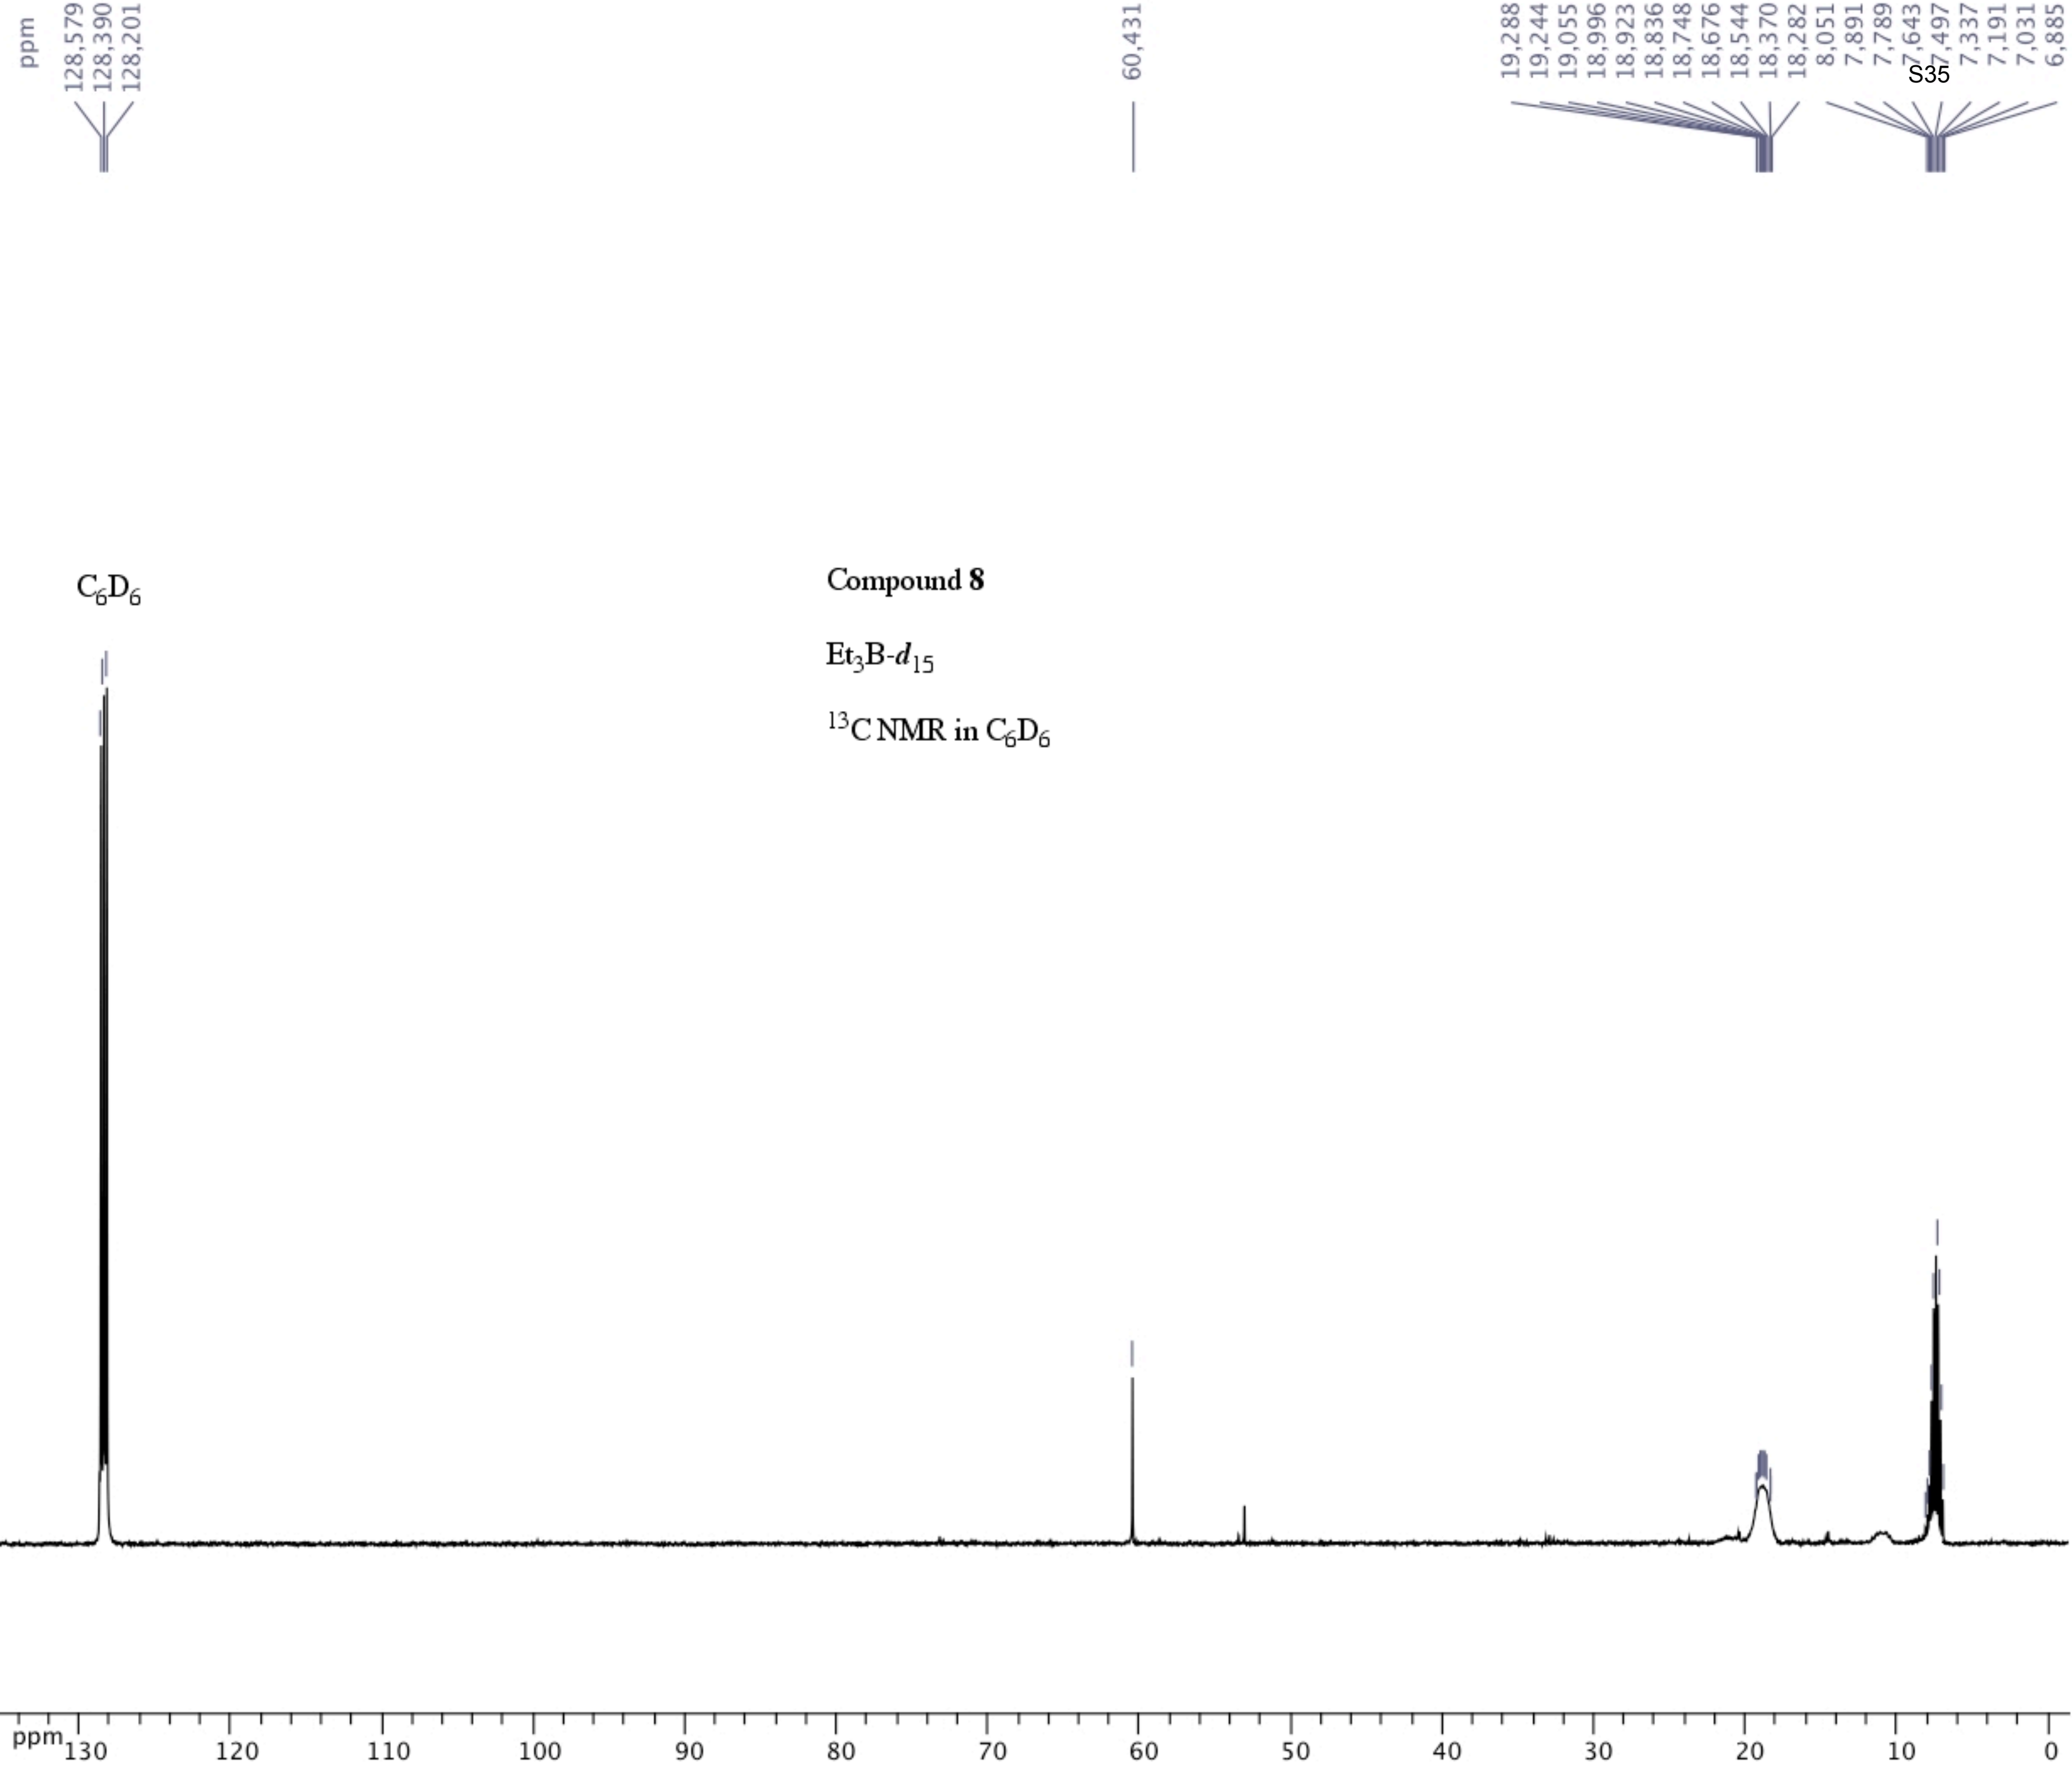

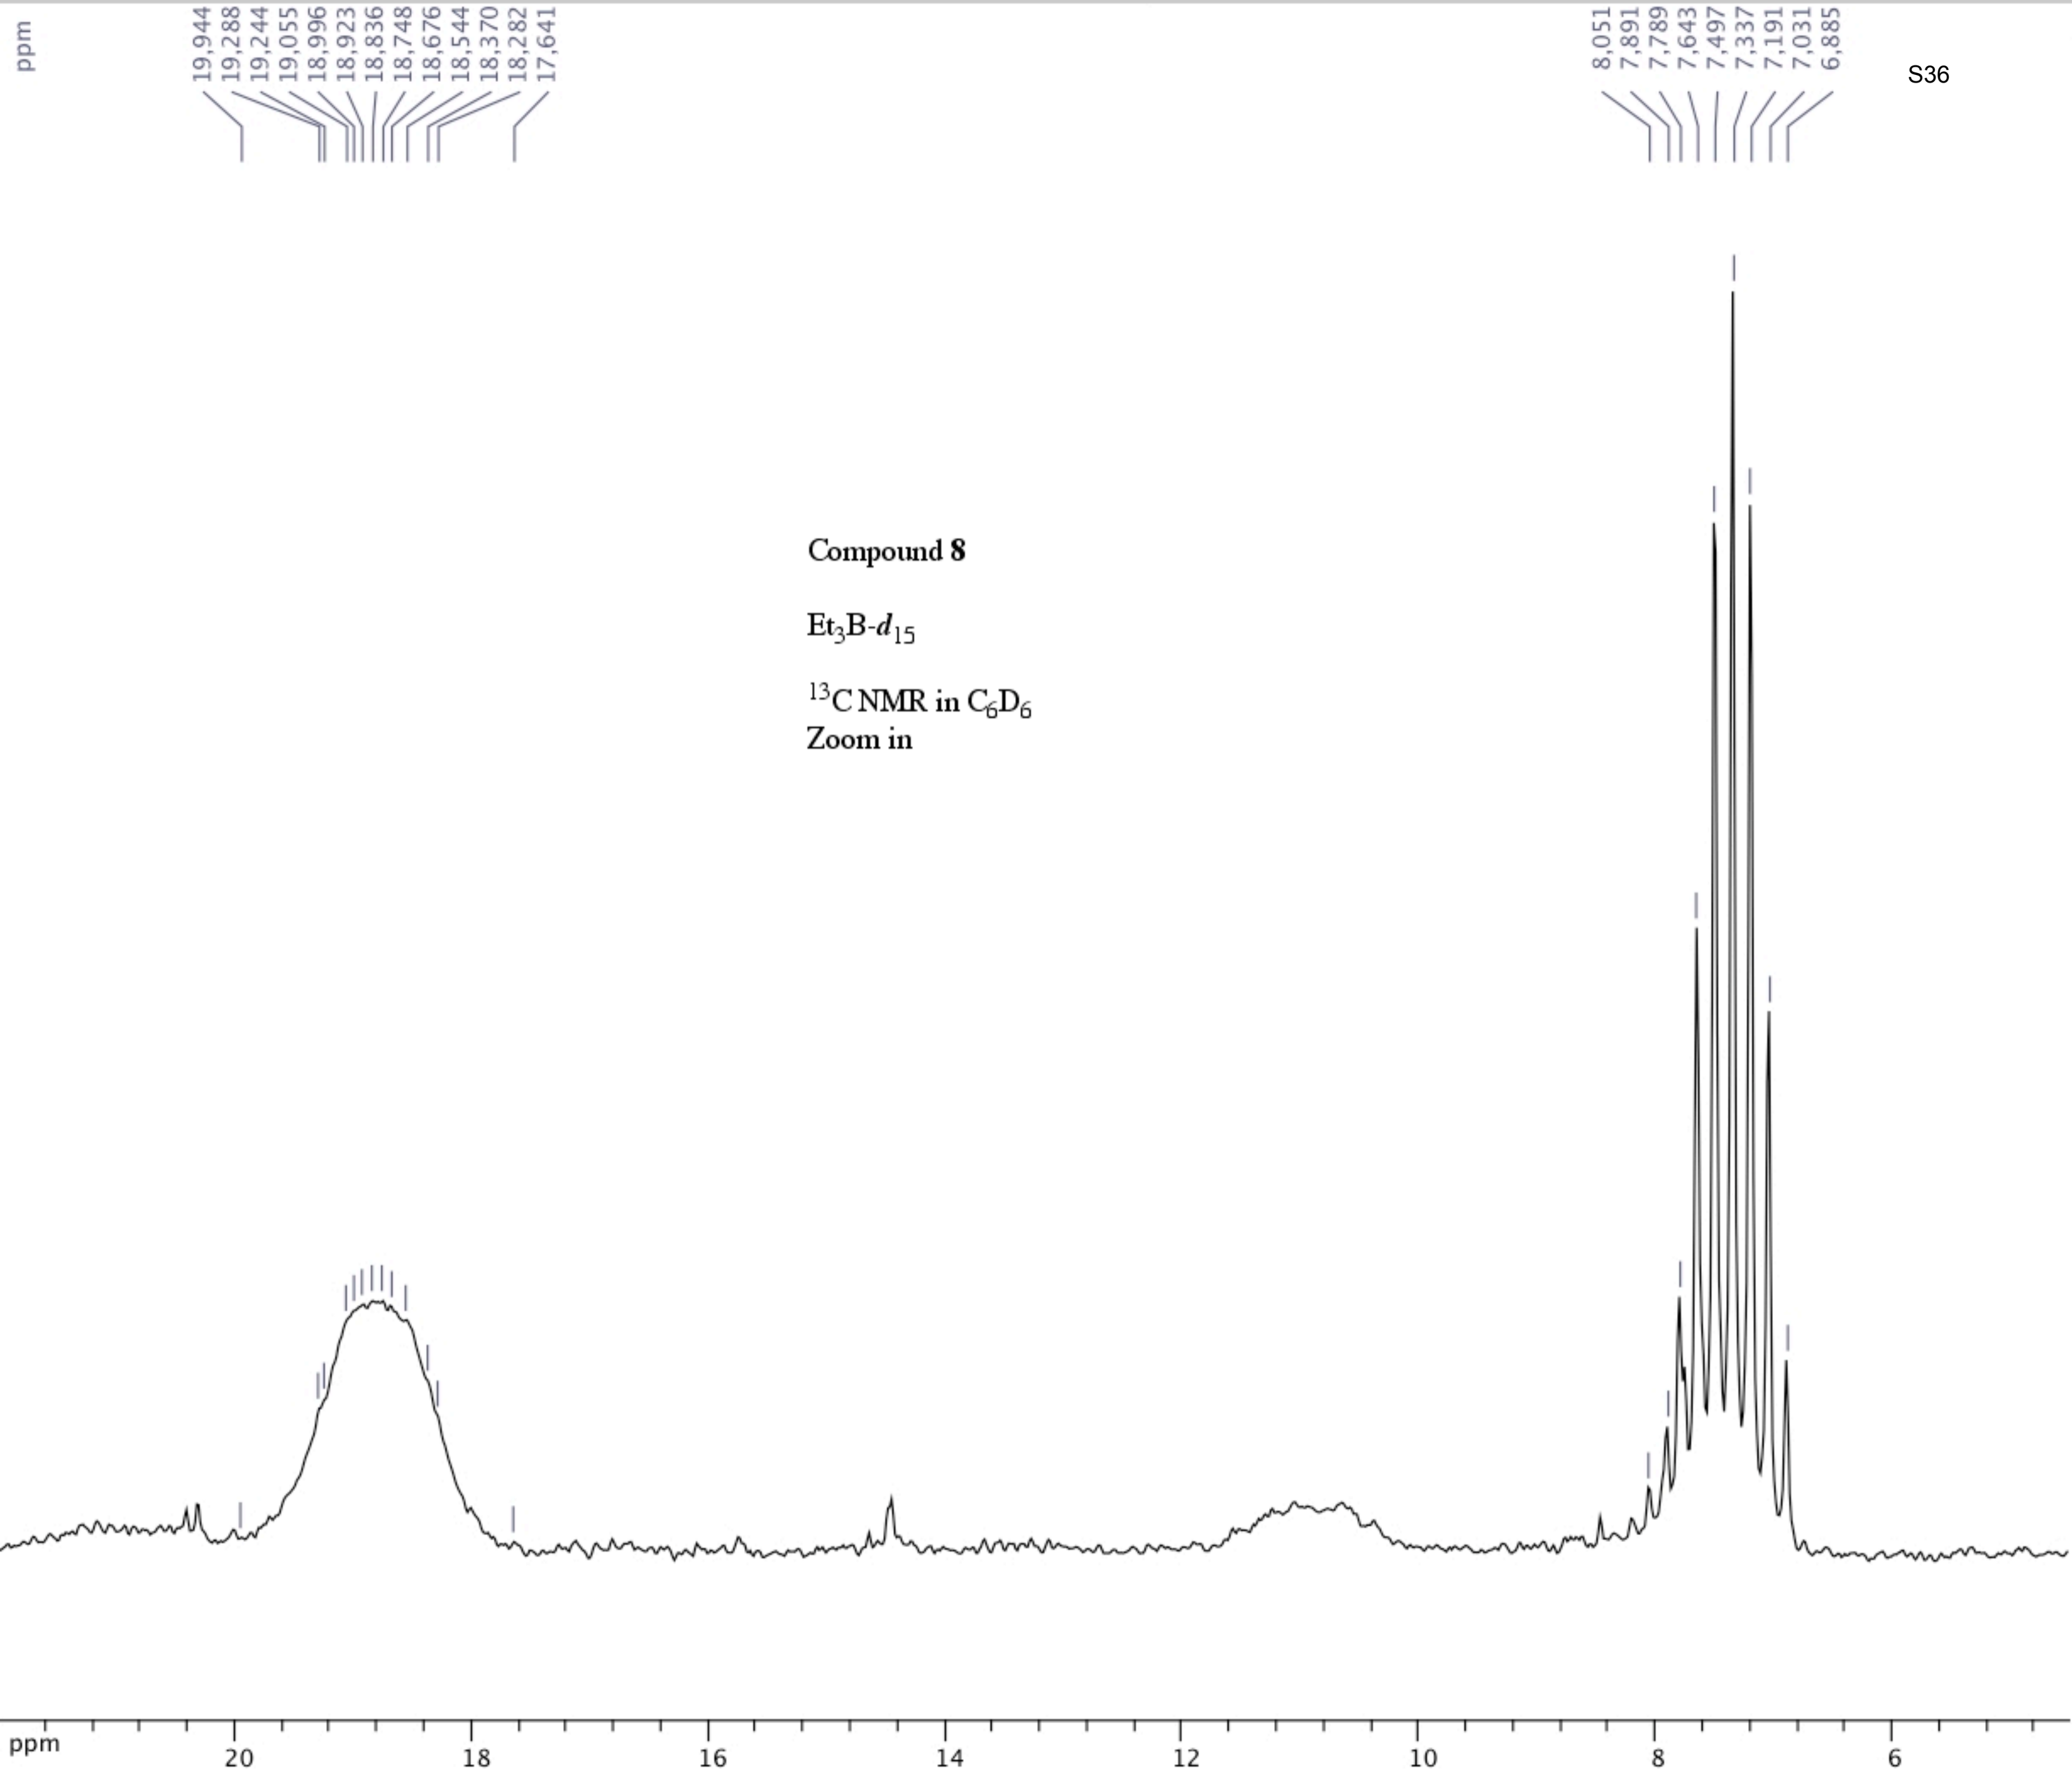

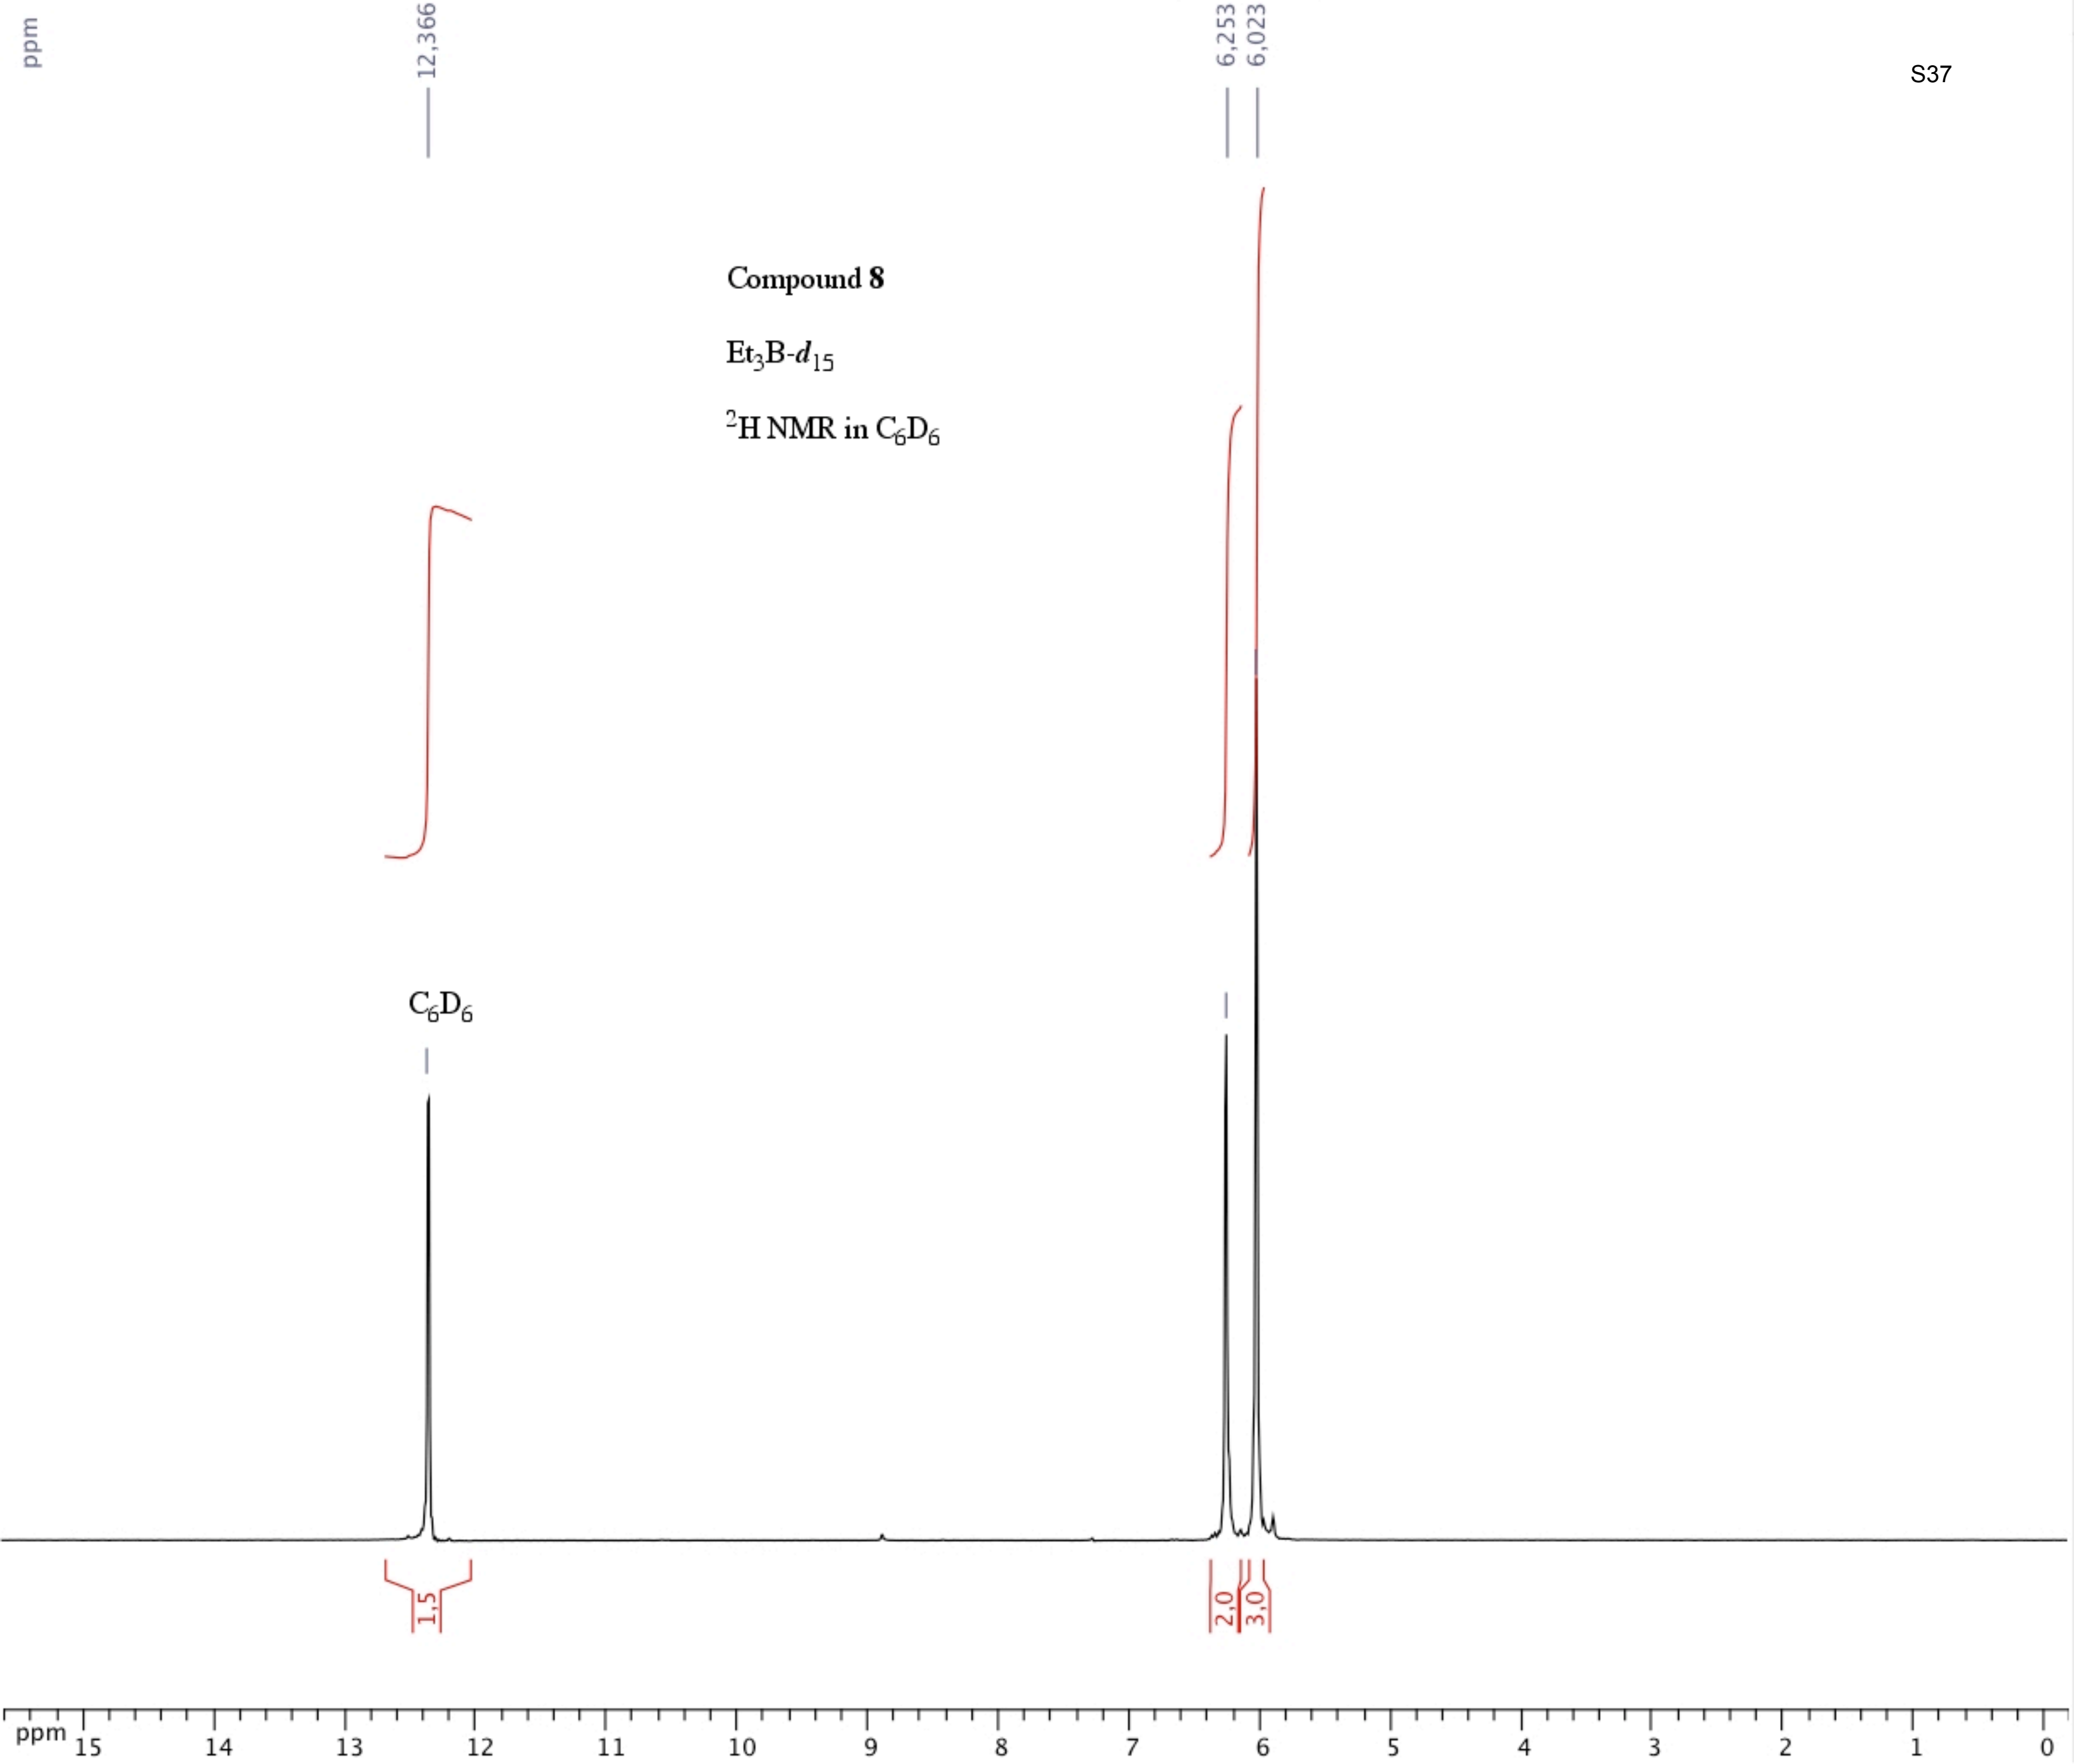

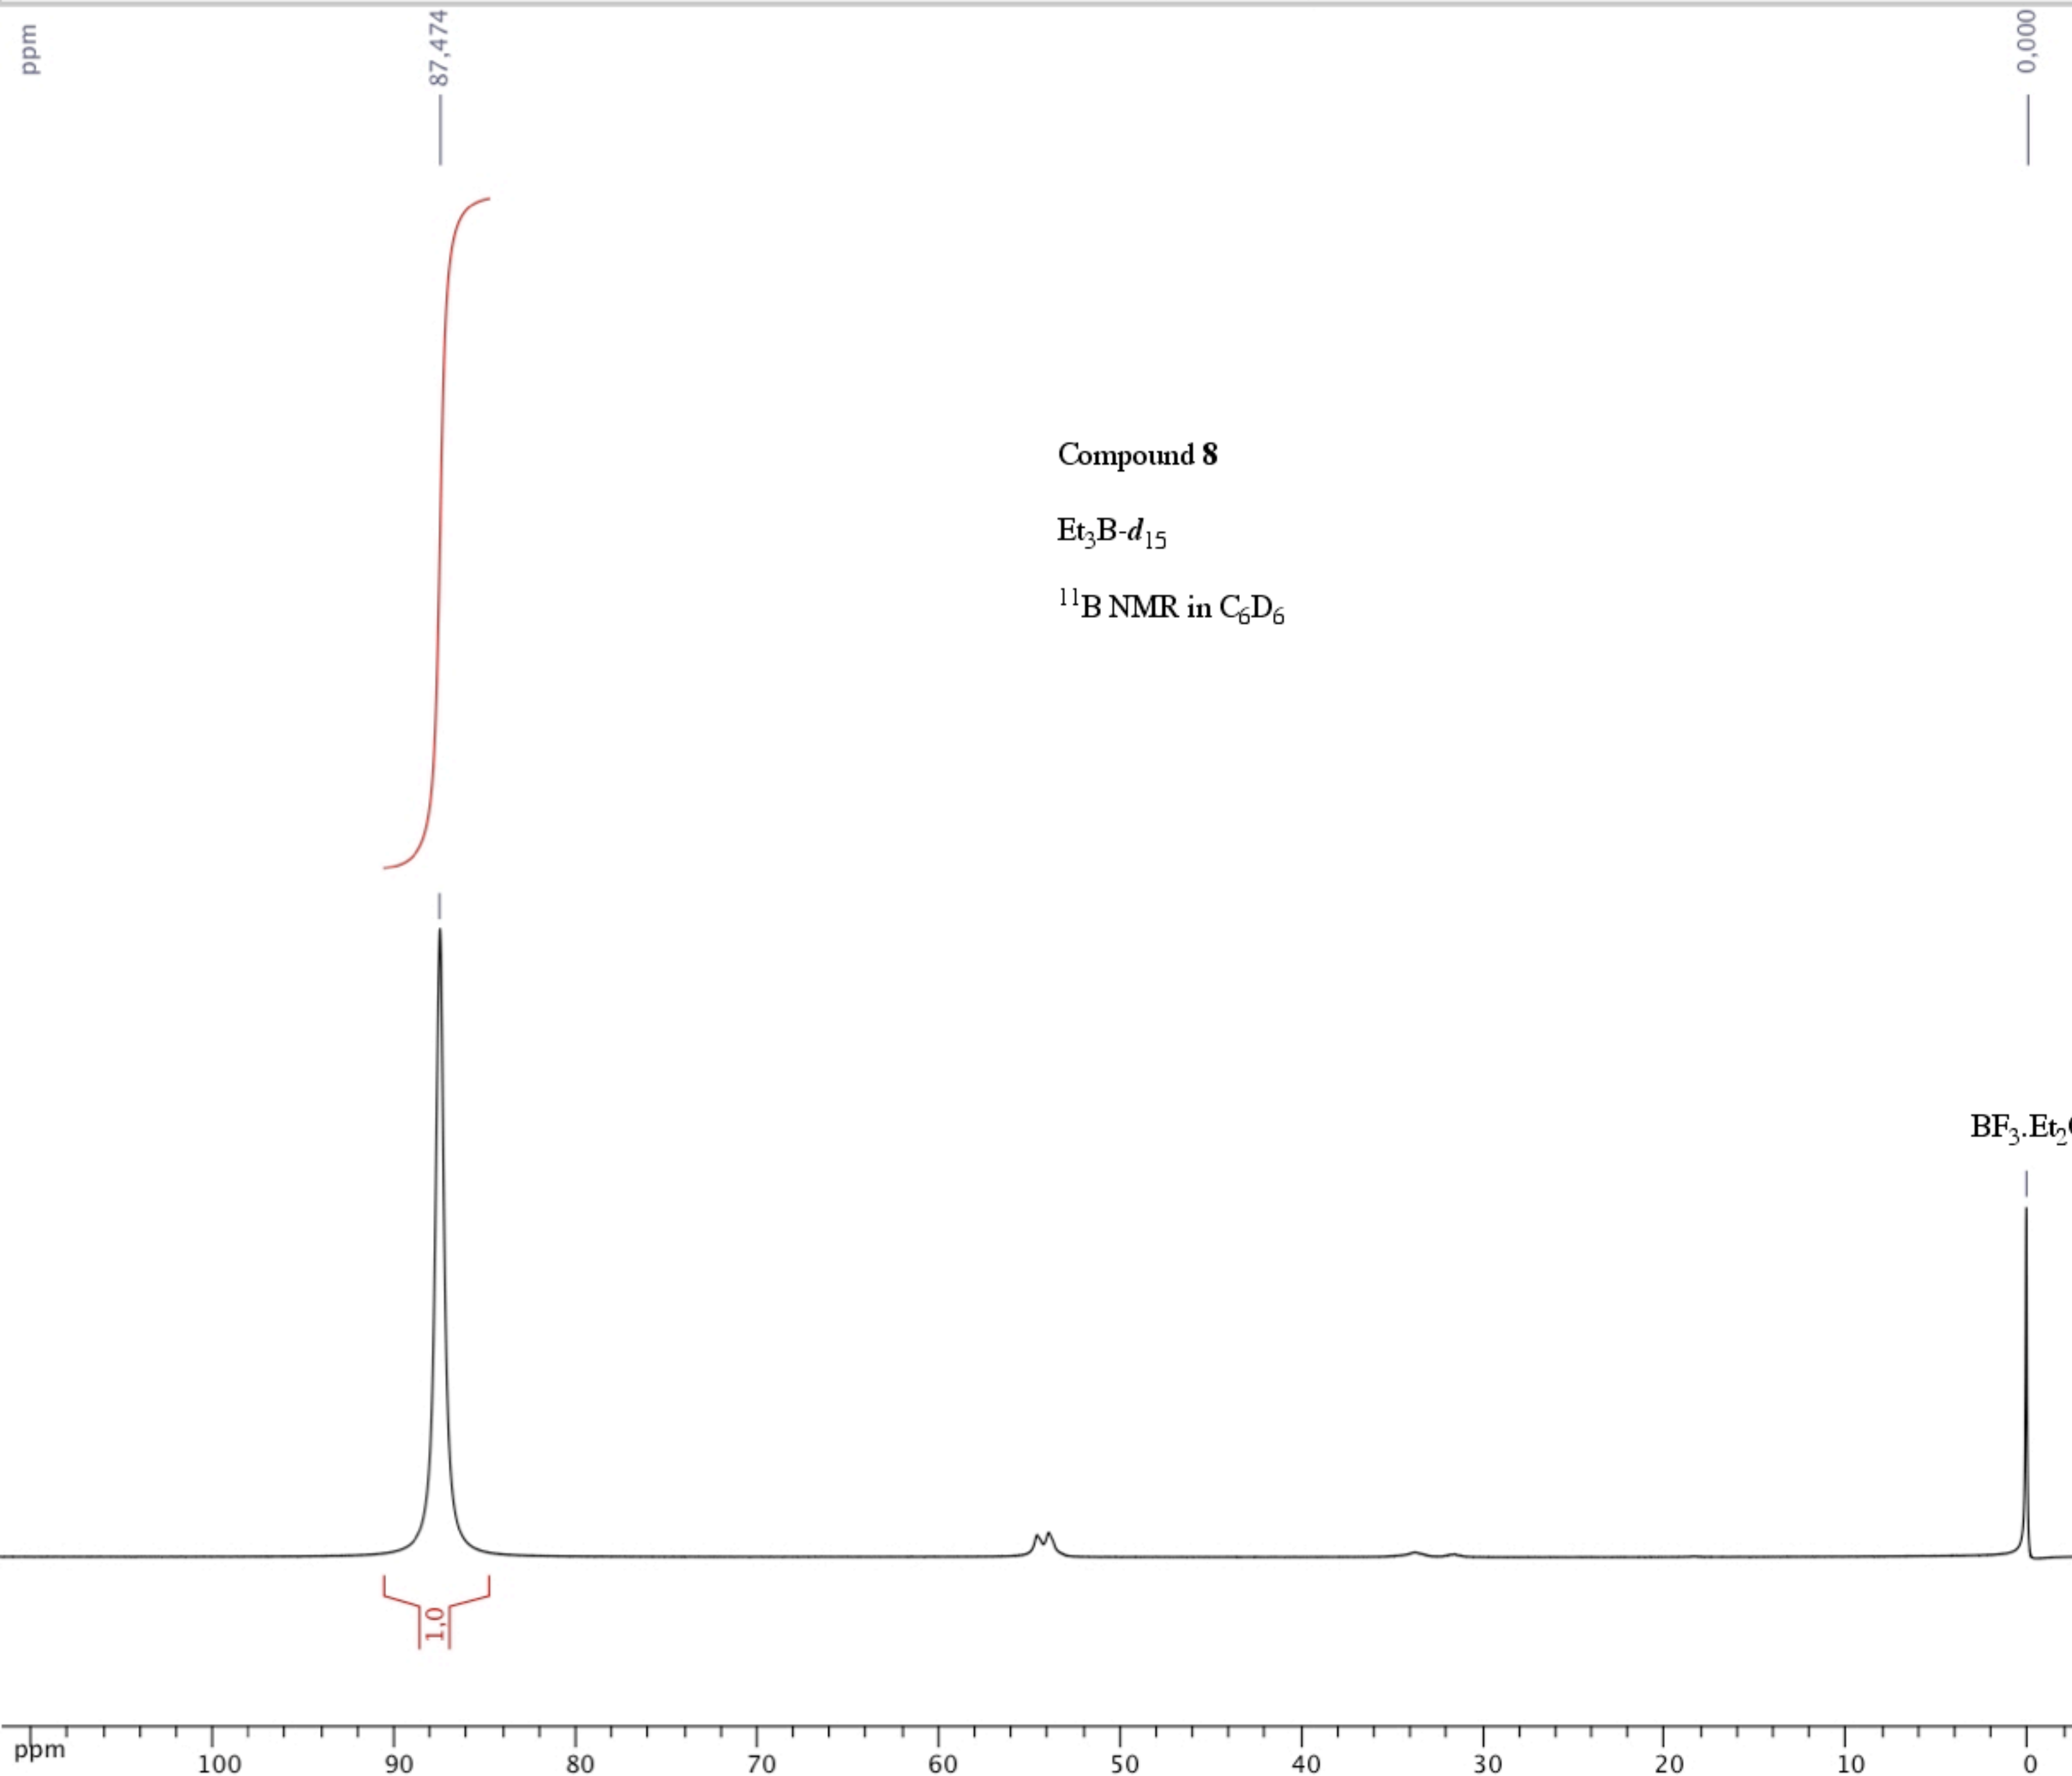

BET3 4 (1D 11B)

F1 :

- Size : 32768 points complex
- Spectral Width : 32051.281 Hz
- Carrier Frequency : 160.4766 MHz
- Nucleus : 11B

Type : 1D

Spectro : BRUKER 3954 MHz

Probe : 5 mm PABBO BB-1H Z-GRD Z8007

Date : Fri Apr 06 19:09:29 CEST 2007

Temperature : 300.0 K

Solvent : C6D6



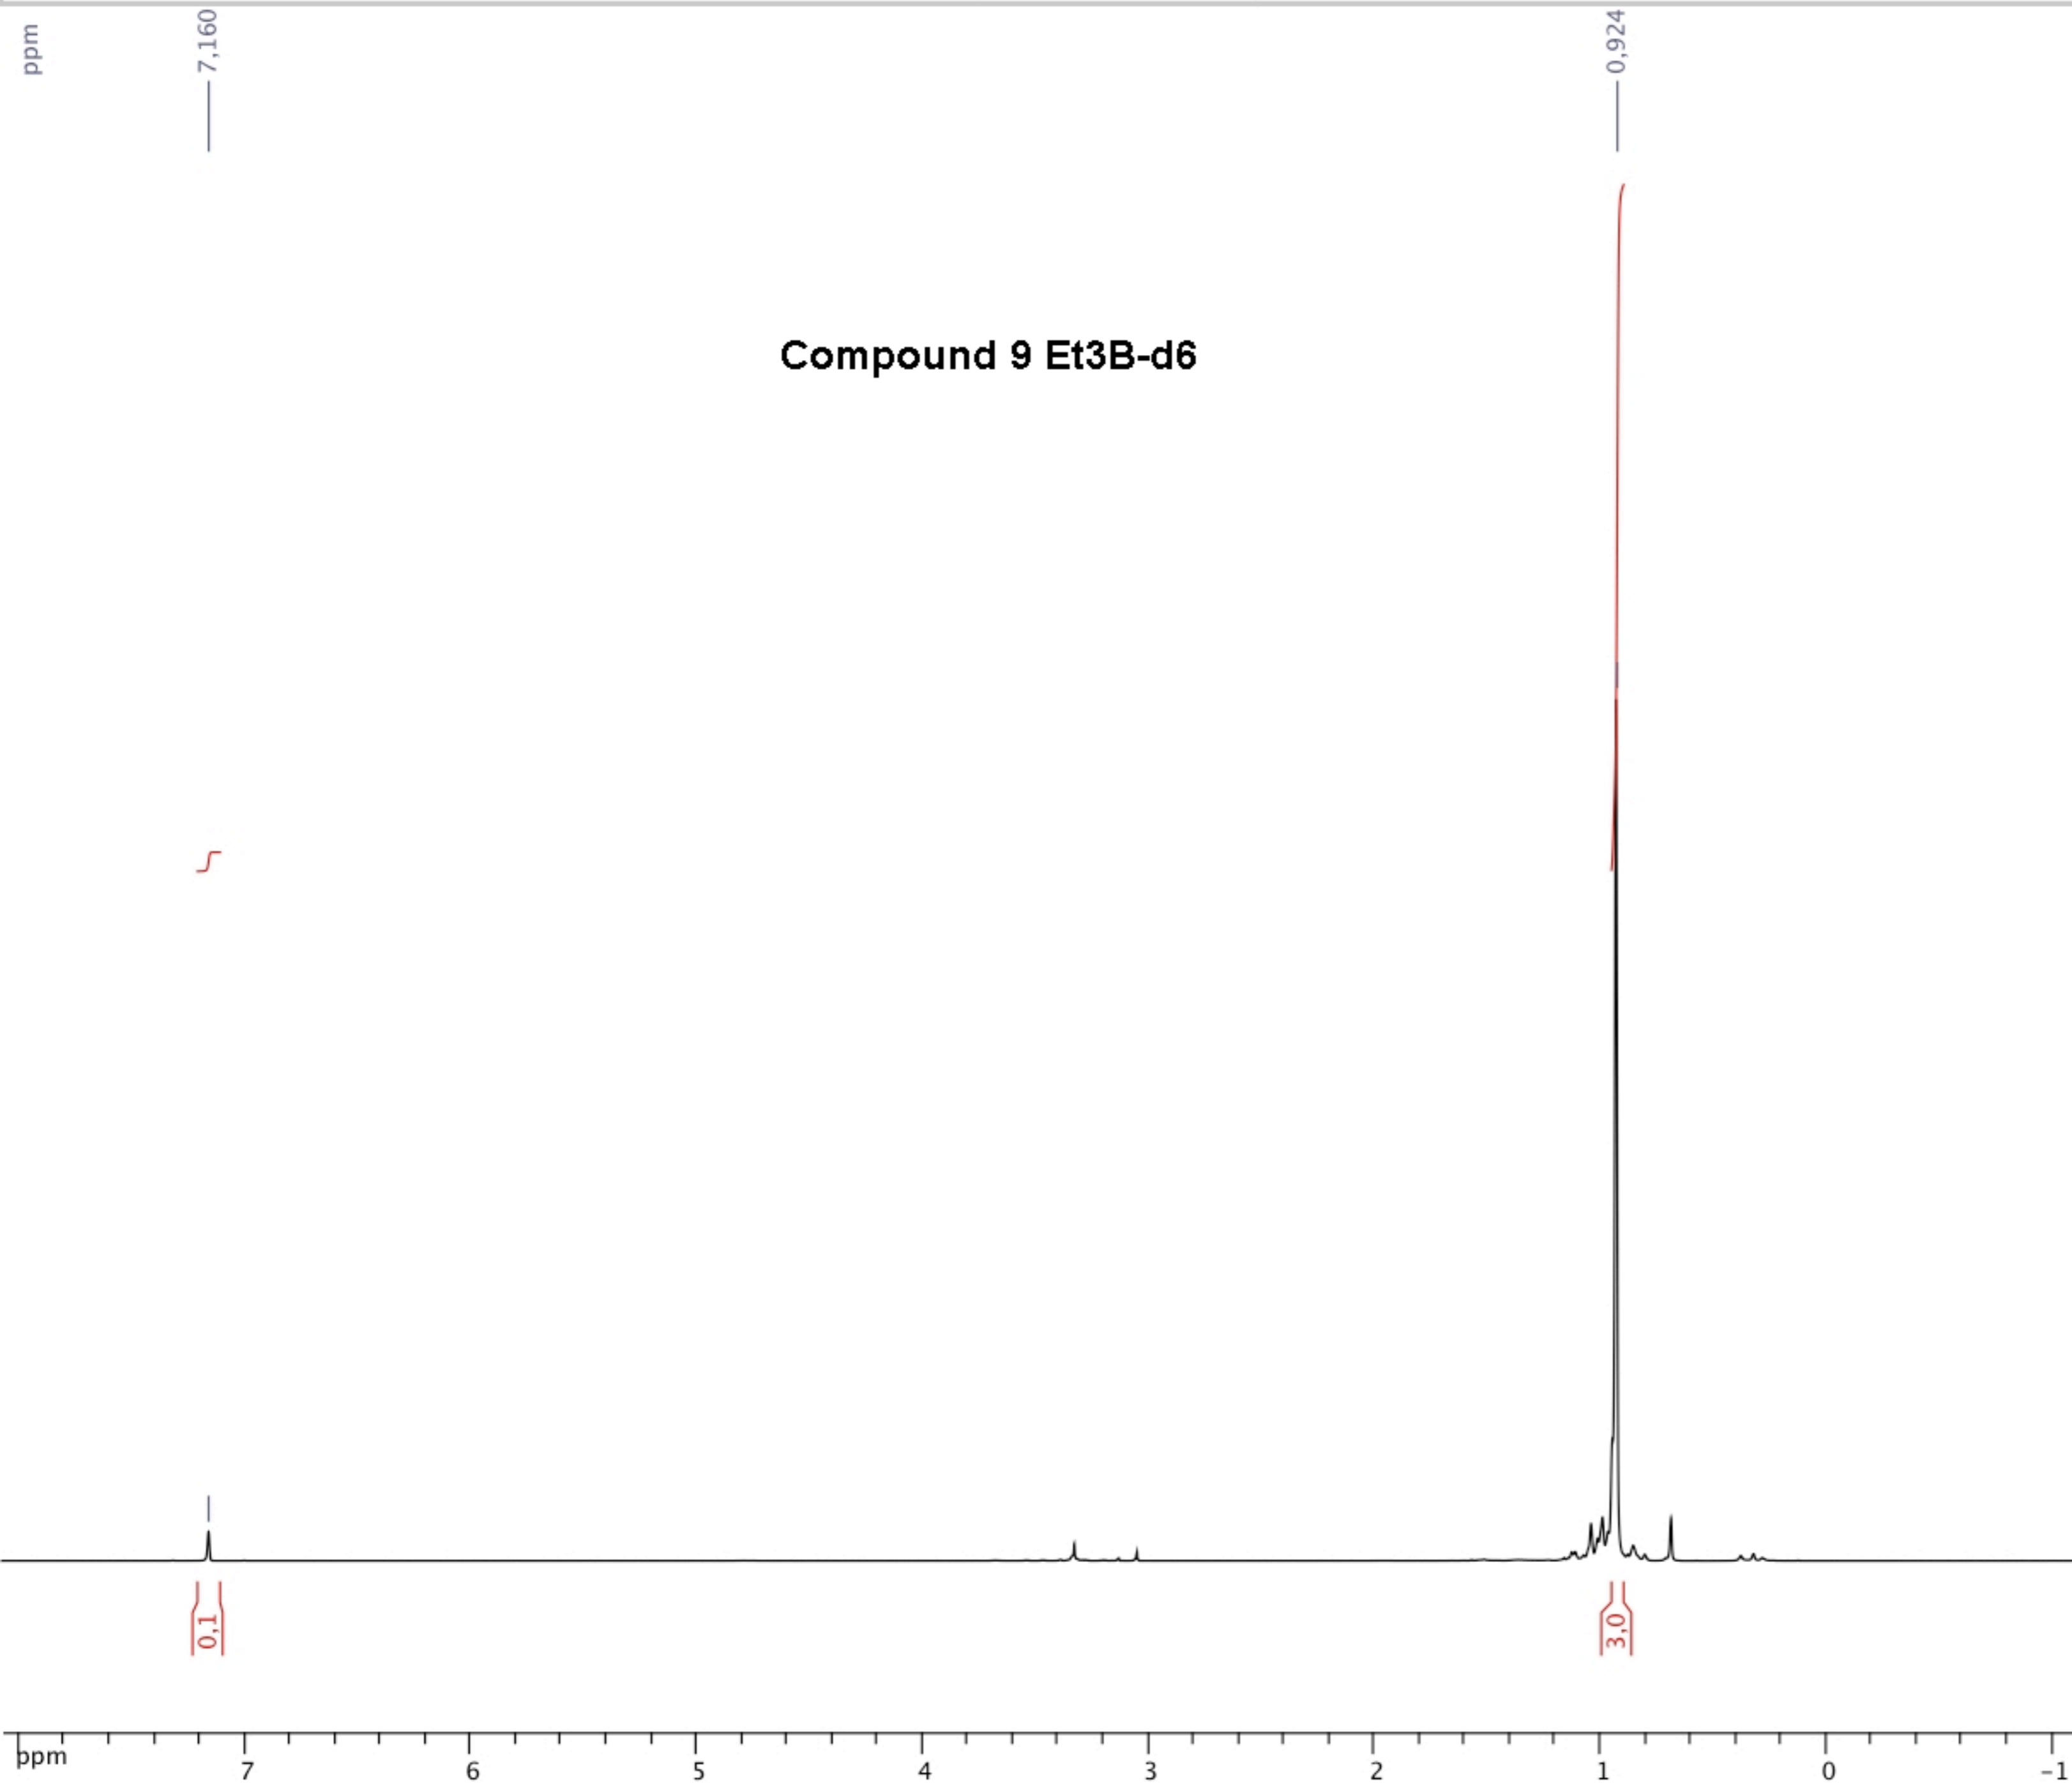B(CD<sub>2</sub>CH<sub>3</sub>)<sub>3</sub> 1 (1D 1H)

F1 :

- Size : 32768 points complex
- Spectral Width : 10000.0 Hz
- Carrier Frequency : 500.193 MHz
- Nucleus : 1H

Number of scans : 16

Type : 1D

Spectro : BRUKER 500 MHz

Probe : 5 mm BBI 1H-BB Z-GRD Z810701/

Date : Wed May 30 16:36:58 CEST 2007

Temperature : 298.0 K

Solvent : CDCl<sub>3</sub>

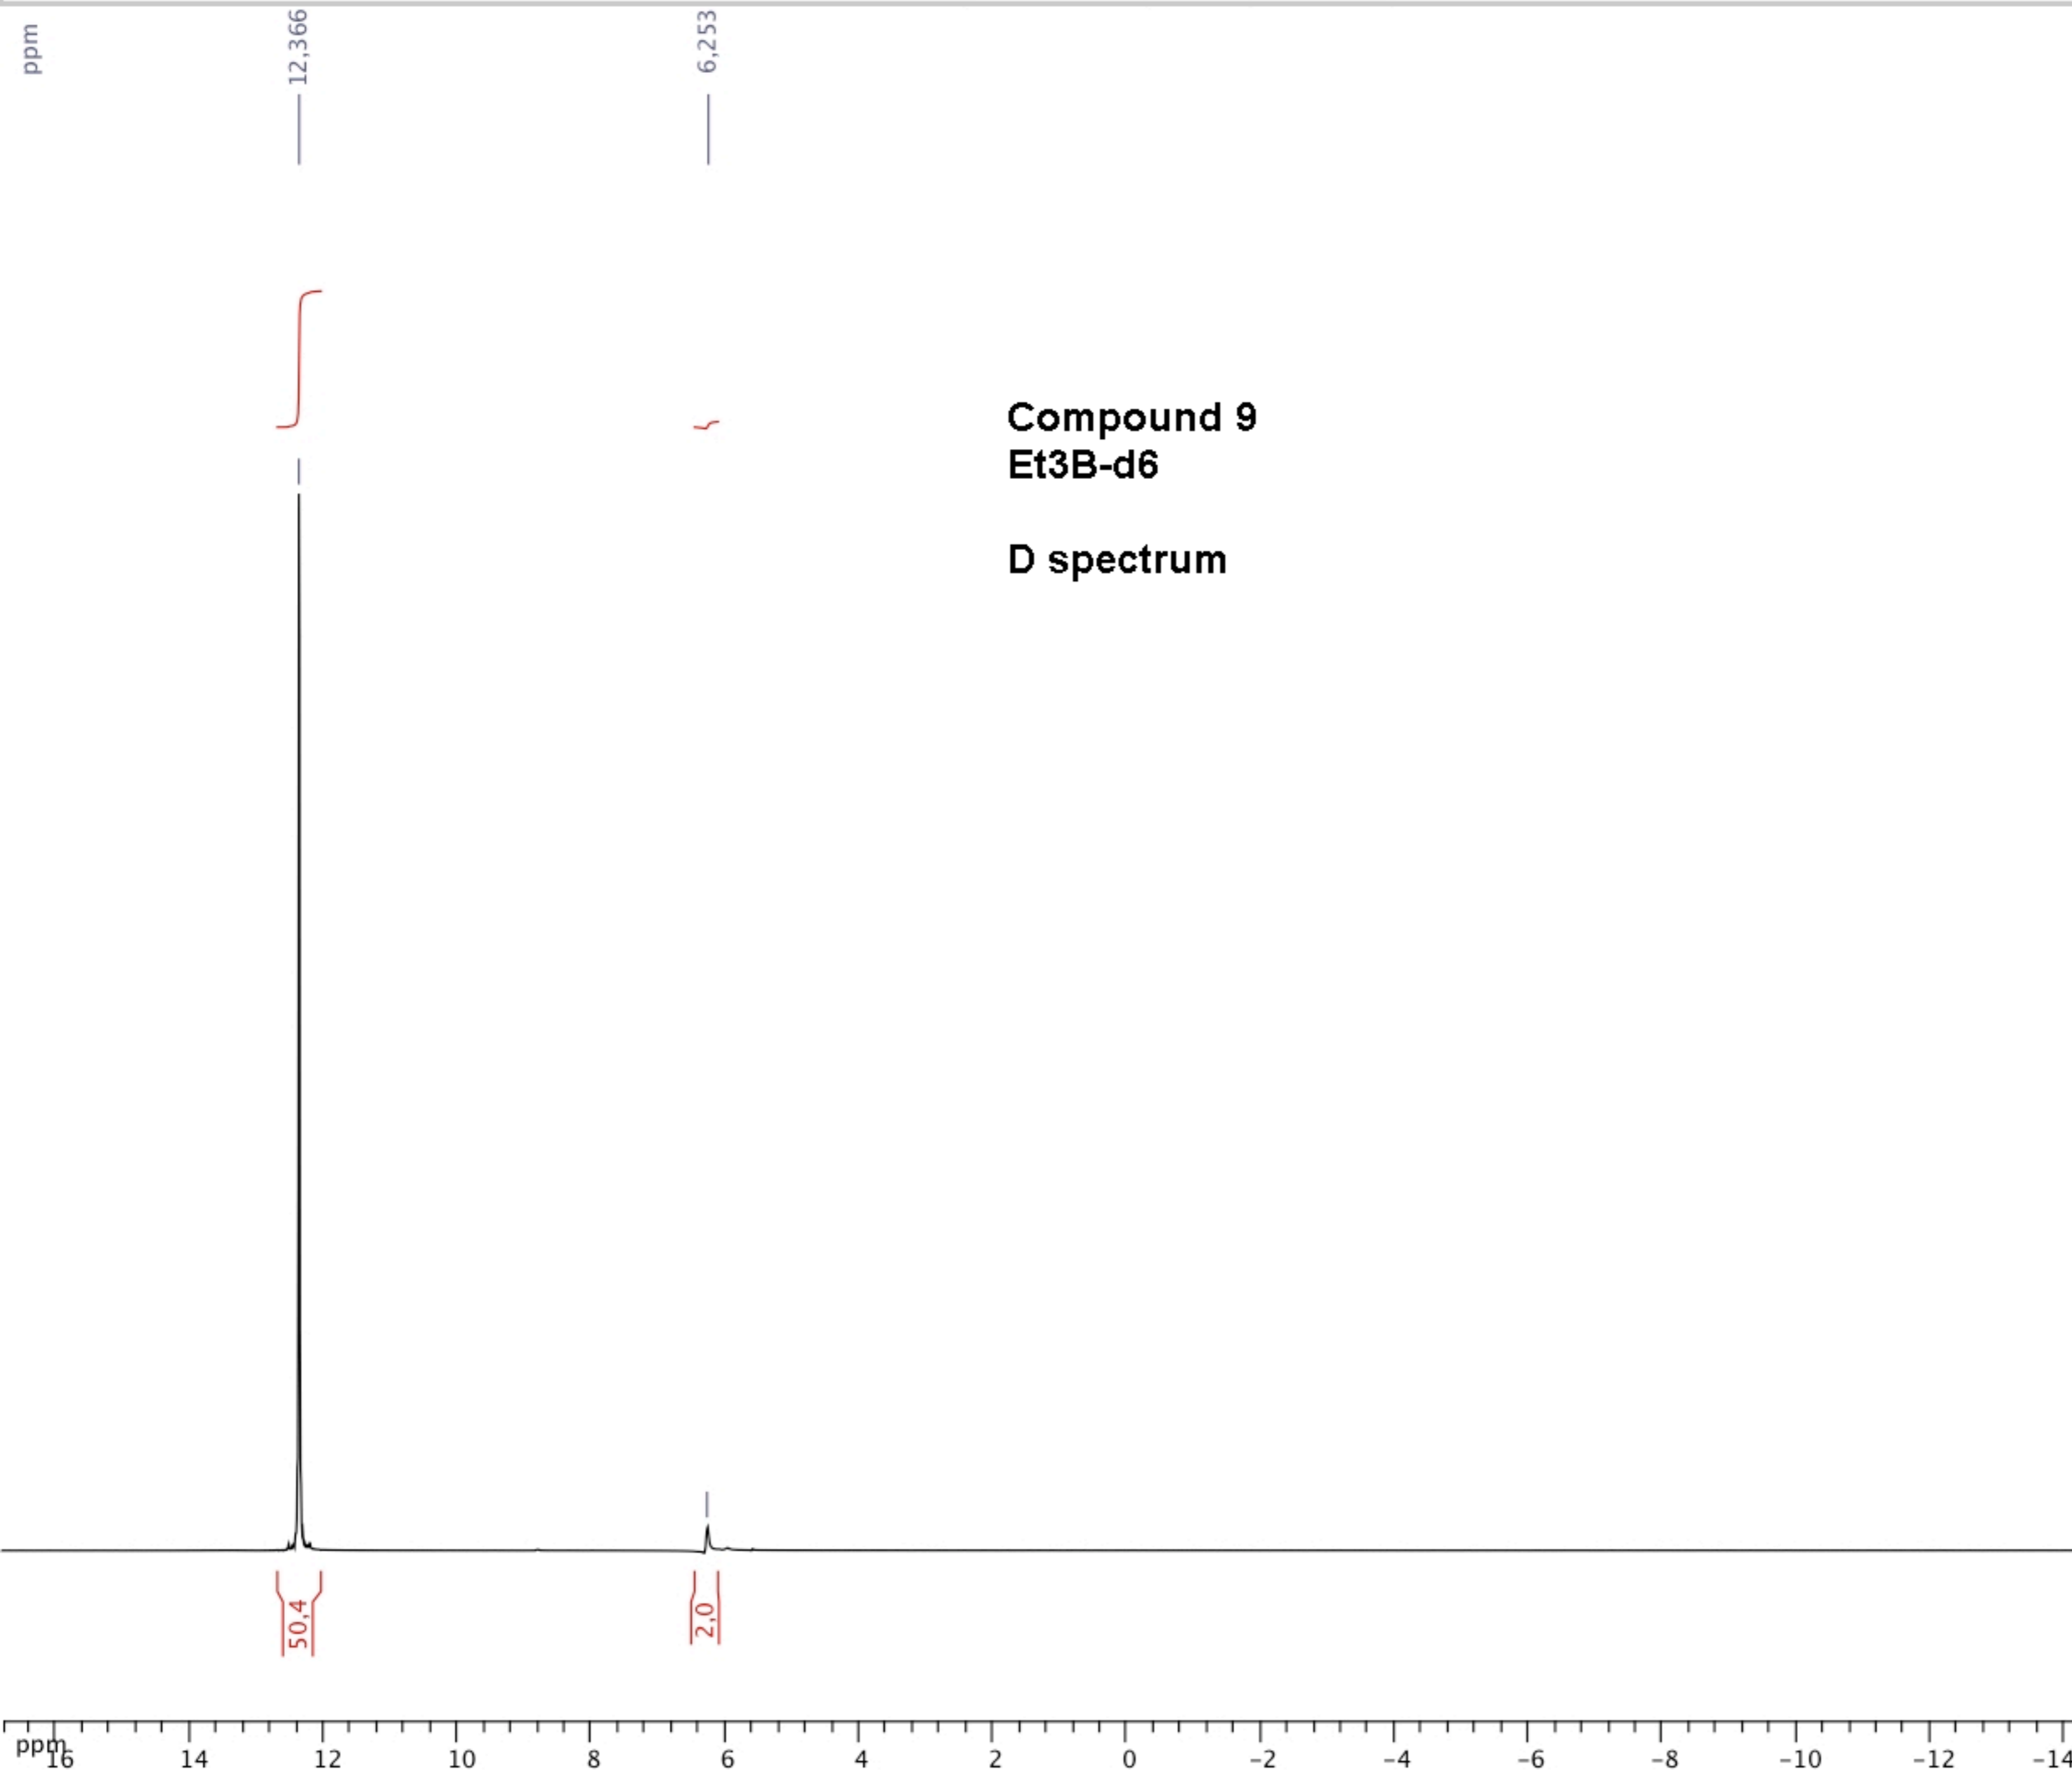B(CD<sub>2</sub>CH<sub>3</sub>)<sub>3</sub> 2 (1D 2H)

F1 :

- Size : 16384 points complex
- Spectral Width : 10000.0 Hz
- Carrier Frequency : 76.78219 MHz
- Nucleus : 2H

Number of scans : 16

Type : 1D

Spectro : BRUKER 500 MHz

Probe : 5 mm BBI 1H-BB Z-GRD Z810701/

Date : Wed May 30 16:45:39 CEST 2007

Temperature : 298.0 K

Solvent : C6D6

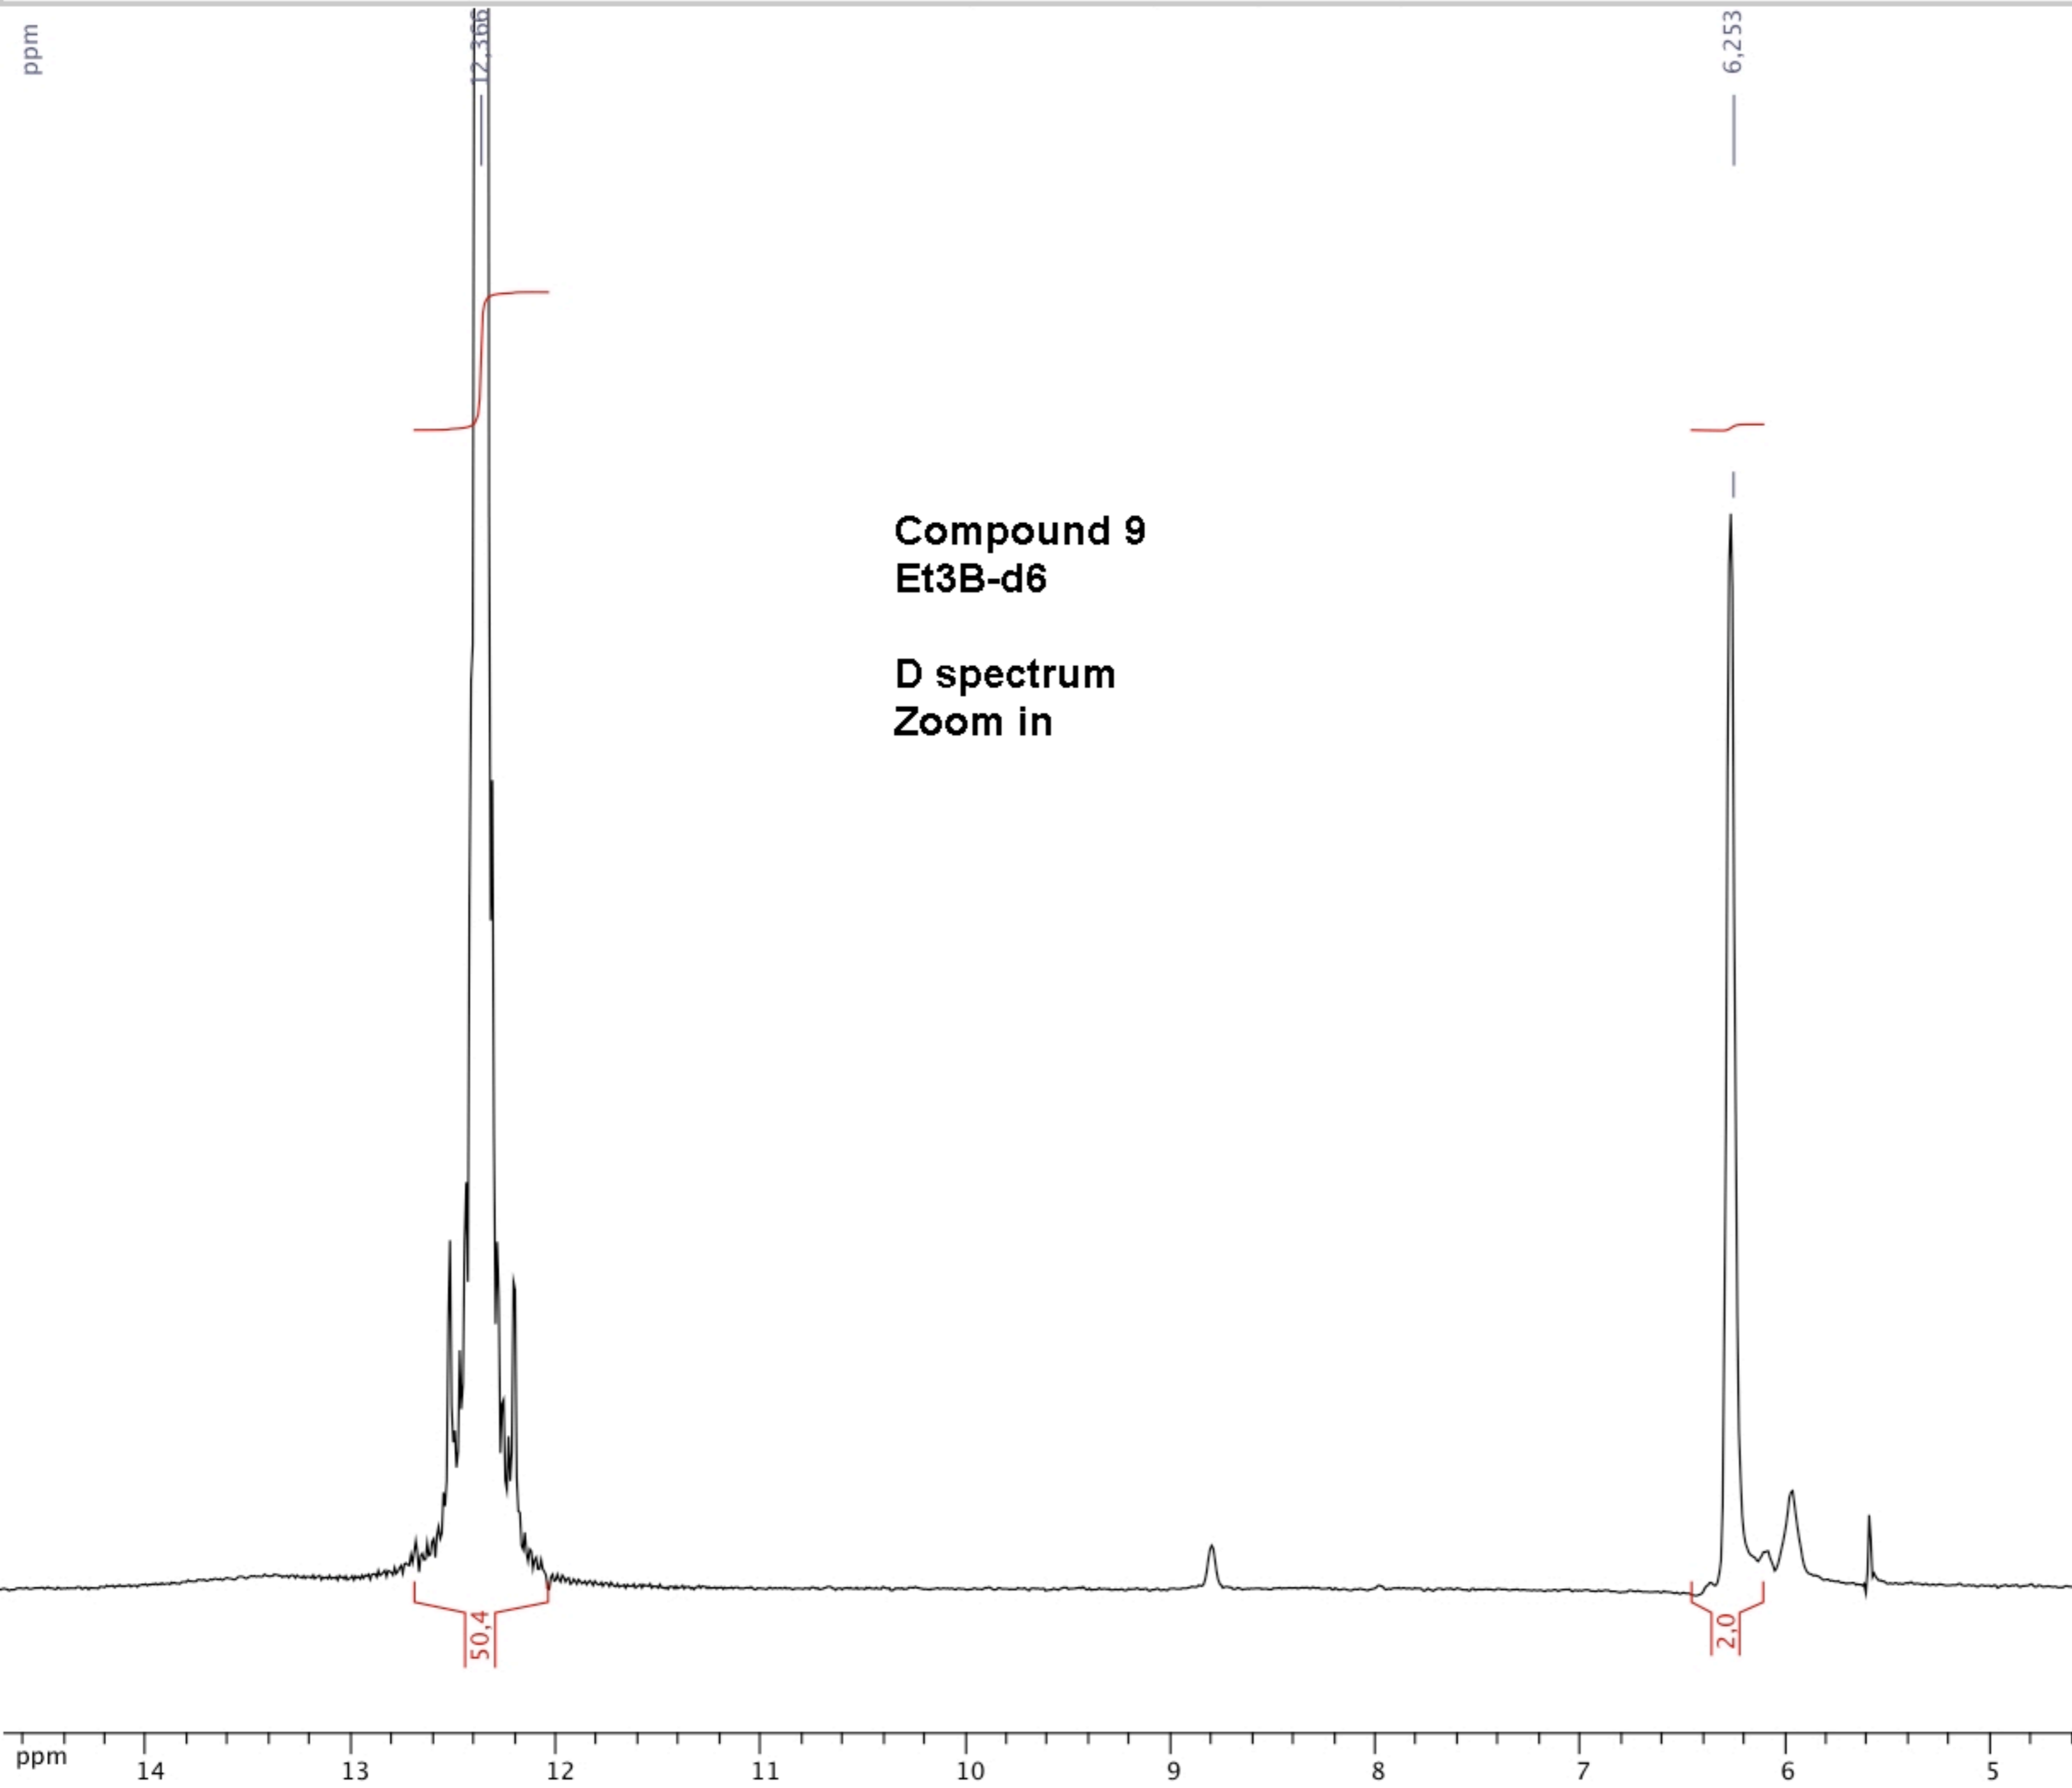B(CD<sub>2</sub>CH<sub>3</sub>)<sub>3</sub> 2 (1D 2H)

F1 :

- Size : 16384 points complex
- Spectral Width : 10000.0 Hz
- Carrier Frequency : 76.78219 MHz
- Nucleus : 2H

Number of scans : 16

Type : 1D

Spectro : BRUKER 500 MHz

Probe : 5 mm BBI 1H-BB Z-GRD Z810701/

Date : Wed May 30 16:45:39 CEST 2007

Temperature : 298.0 K

Solvent : C6D6

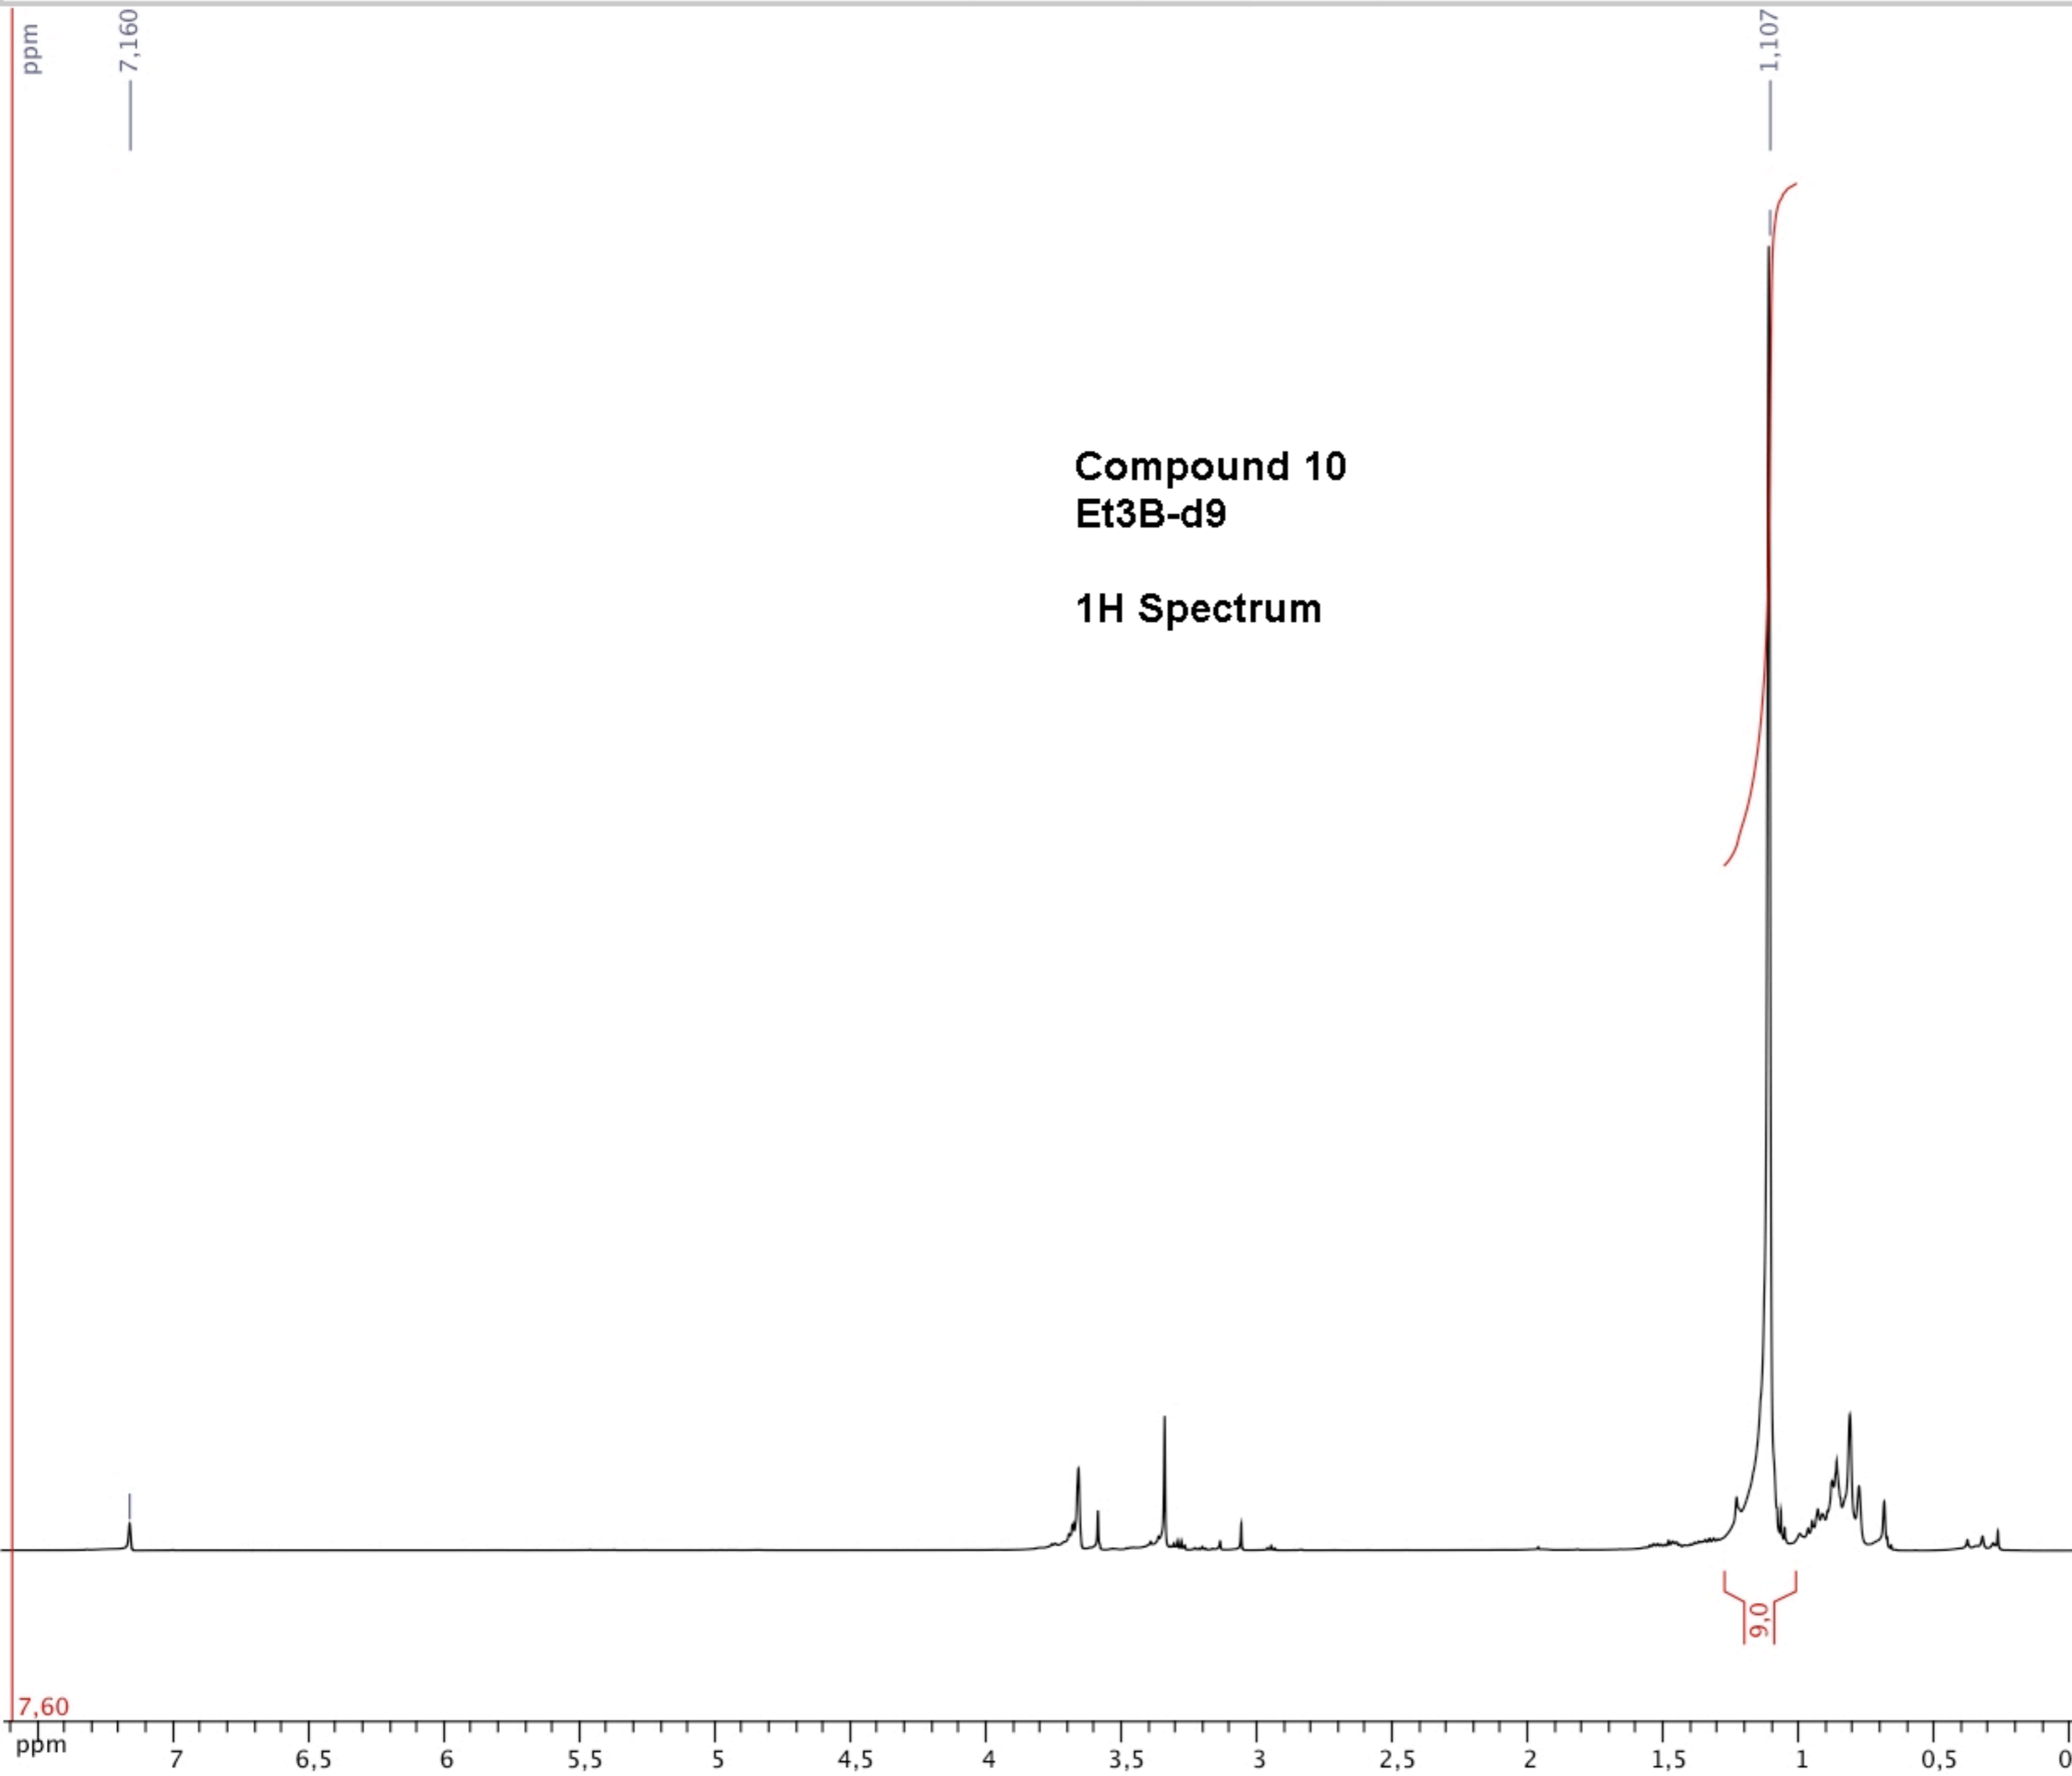B(CH<sub>2</sub>CD<sub>3</sub>)<sub>3</sub> 2 (1D 1H)

F1 :

- Size : 32768 points complex
- Spectral Width : 10000.0 Hz
- Carrier Frequency : 500.193 MHz
- Nucleus : <sup>1</sup>H

Number of scans : 16

Type : 1D

Spectro : BRUKER 500 MHz

Probe : 5 mm BBI 1H-BB Z-GRD Z810701/

Date : Mon Jun 04 11:59:44 CEST 2007

Temperature : 298.0 K

Solvent : CDCl<sub>3</sub>

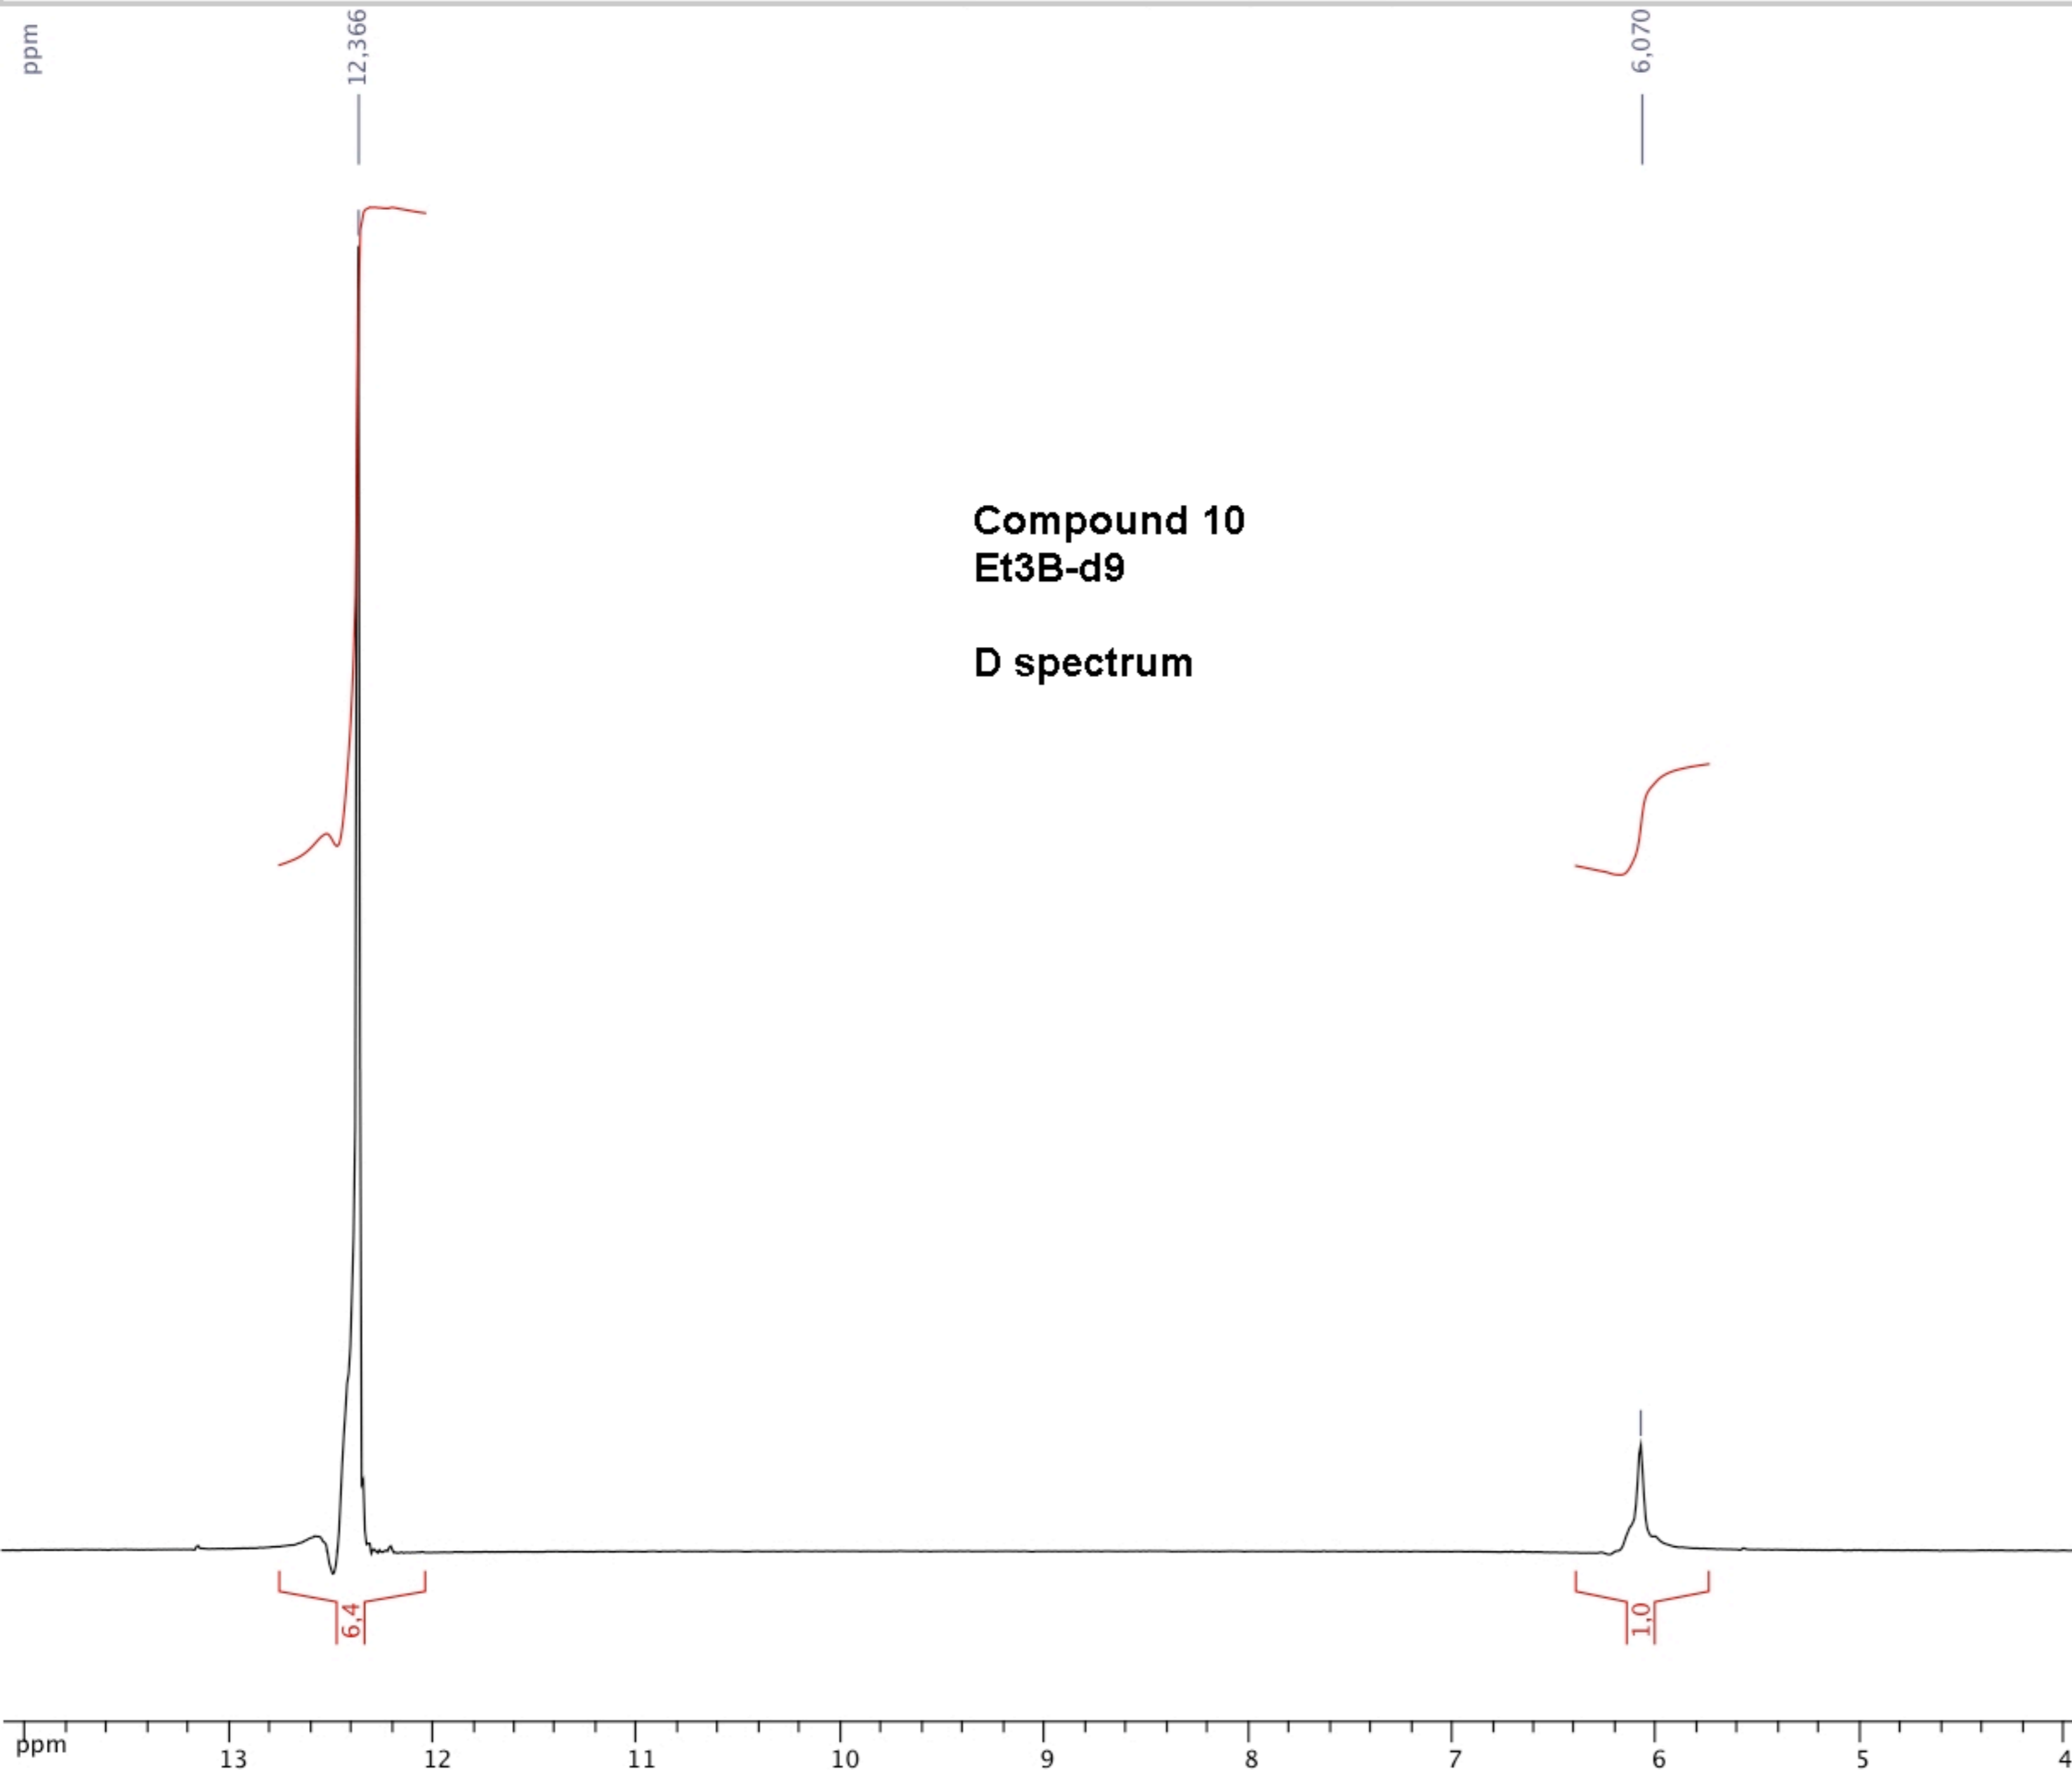B(CH<sub>2</sub>CD<sub>3</sub>)<sub>3</sub> 1 (1D 2H)

F1 :

- Size : 16384 points complex
- Spectral Width : 10000.0 Hz
- Carrier Frequency : 76.78219 MHz
- Nucleus : 2H

Number of scans : 1

Type : 1D

Spectro : BRUKER 500 MHz

Probe : 5 mm BBI 1H-BB Z-GRD Z810701/

Date : Mon Jun 04 11:54:59 CEST 2007

Temperature : 298.0 K

Solvent : C<sub>6</sub>D<sub>6</sub>
